# Supplementary material for: Oestrogen receptor polymorphisms are an associated risk factor for mild cognitive impairment and Alzheimer disease in women APOE ɛ4 carriers: a case–control study
Source: PubMed Central journal article supplement — BMJ Open. 2013 Sep 18;3(9):e003200. doi: 10.1136/bmjopen-2013-003200 (PMC3780298; doi:10.1136/bmjopen-2013-003200), 2013-09-18
Supplement: bmjopen-2013-003200.draft_revisions.pdf [file bmjopen-2013-003200.draft_revisions.pdf]

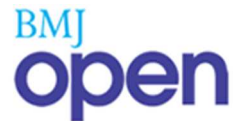

**Estrogen receptor polymorphisms are an associated risk factor for mild cognitive impairment and Alzheimer disease in women APOE ε4 carriers**

|                                 |                                                                                                                                                                                                                                                                                                                                                                                                                                                                                                                                                                                                                                                                                                                                                                                                                                                                                                                                                                                         |
|---------------------------------|-----------------------------------------------------------------------------------------------------------------------------------------------------------------------------------------------------------------------------------------------------------------------------------------------------------------------------------------------------------------------------------------------------------------------------------------------------------------------------------------------------------------------------------------------------------------------------------------------------------------------------------------------------------------------------------------------------------------------------------------------------------------------------------------------------------------------------------------------------------------------------------------------------------------------------------------------------------------------------------------|
| Journal:                        | <i>BMJ Open</i>                                                                                                                                                                                                                                                                                                                                                                                                                                                                                                                                                                                                                                                                                                                                                                                                                                                                                                                                                                         |
| Manuscript ID:                  | bmjopen-2013-003200                                                                                                                                                                                                                                                                                                                                                                                                                                                                                                                                                                                                                                                                                                                                                                                                                                                                                                                                                                     |
| Article Type:                   | Research                                                                                                                                                                                                                                                                                                                                                                                                                                                                                                                                                                                                                                                                                                                                                                                                                                                                                                                                                                                |
| Date Submitted by the Author:   | 16-May-2013                                                                                                                                                                                                                                                                                                                                                                                                                                                                                                                                                                                                                                                                                                                                                                                                                                                                                                                                                                             |
| Complete List of Authors:       | Fernández-Martínez, Manuel; Hospital Universitario Cruces, Neurology Elcoroaristizabal, Xabier; University of Basque Country UPV/EHU, Blanco, Elisa; Hospital Universitario Cruces, Neurology Galdós, Luis; Hospital Universitario Txagorritxu,, Neurology Gómez-Busto, Fernando; Vitoria-Gasteiz city Council, San Prudencio Comprehensive Care Center for elderly Álvarez-Álvarez, Maite; University of Basque Country UPV/EHU, Molano, Ana; Hospital Universitario Cruces, Neurology Bereincua, Rocío; Hospital Universitario Cruces, Neurology Inglés, Sandra; Hospital Universitario Txagorritxu, Neurology Uterga, Juan; Hospital Universitario Basurto, Neurology Indakoetxea, Begoña; Hospital Universitario Donostia, Neurology Gómez-Beldarraín, María; Hospital Galdakao, Neurology Moraza, Josefa; Hospital Santiago Apóstol, Neurology Barandiarán, Myriam; Hospital Universitario Donostia, Neurology Martínez-De Pancorbo, Marian; University of Basque Country UPV/EHU, |
| <b>Primary Subject Heading</b>: | Neurology                                                                                                                                                                                                                                                                                                                                                                                                                                                                                                                                                                                                                                                                                                                                                                                                                                                                                                                                                                               |
| Secondary Subject Heading:      | Geriatric medicine                                                                                                                                                                                                                                                                                                                                                                                                                                                                                                                                                                                                                                                                                                                                                                                                                                                                                                                                                                      |
| Keywords:                       | Dementia < NEUROLOGY, Adult neurology < NEUROLOGY, GENETICS                                                                                                                                                                                                                                                                                                                                                                                                                                                                                                                                                                                                                                                                                                                                                                                                                                                                                                                             |

SCHOLARONE™  
Manuscripts

## Estrogen receptor polymorphisms are an associated risk factor for mild cognitive impairment and Alzheimer disease in women APOE ε4 carriers

Manuel Fernández-Martínez<sup>1\*§</sup>, Xabier Elcoroaristizabal Martín<sup>2\*</sup>, Blanco Martín<sup>1</sup>, Luis Galdos Alcelay<sup>3</sup>, Fernando Gómez Busto<sup>4</sup>, Maite Álvarez-Álvarez<sup>2</sup>, Ana Molano Salazar<sup>1</sup>, Rocio Bereincua Gandarias<sup>1</sup>, Sandra Inglés Borda<sup>3</sup>, Juan María Uterga Valiente<sup>5</sup>, Begoña Indakoetxea Juanbeltz<sup>6</sup>, María Ángeles Gómez Beldarraín<sup>7</sup>, Josefa Moraza López<sup>8</sup>, Myriam Barandiarán Amillano<sup>6</sup>, Marian M. de Pancorbo<sup>2</sup>.

\*Equally Contributed.

§Corresponding author.

<sup>1</sup>Neurology Department. Hospital Universitario Cruces. BioCruces Health Research Institute (Barakaldo-Vizcaya). Spain. <sup>2</sup>BIOMICS Research Group. Dpt. of Z. and Cellular Biology A. Centro de Investigación y Estudios Avanzados Lucio Lascaray (CIEA). University of Basque Country UPV/EHU (Vitoria-Gasteiz). Spain. <sup>3</sup>Neurology Department. Hospital Universitario Txagorritxu. (Vitoria-Gasteiz). Spain. <sup>4</sup>San Prudencio Comprehensive Care Center for elderly. Vitoria-Gasteiz city Council. Basque Country. Spain. <sup>5</sup>Neurology Department. Hospital Universitario Basurto. (Bilbao-Vizcaya). <sup>6</sup>Neurology Department. Hospital Universitario Donostia. (Donostia-Guipuzcoa). <sup>7</sup>Neurology Department. Hospital de Galdakao (Galdakao -Vizcaya) <sup>8</sup>Neurology Department. Hospital Santiago Apóstol. (Vitoria-Gasteiz).

§ Manuel Fernández Martínez - [mfernandezm@oroitu.com](mailto:mfernandezm@oroitu.com)  
Xabier Elcoroaristizabal Martín - [xabierelcoro@gmail.com](mailto:xabierelcoro@gmail.com)  
Elisa Blanco Martín - [eliblam@gmail.com](mailto:eliblam@gmail.com)  
Luís Galdos Alcelay - [luis@lurra.jazztel.es](mailto:luis@lurra.jazztel.es)  
Fernando Gómez Busto - [fgomezbusto@vitoria-gasteiz.org](mailto:fgomezbusto@vitoria-gasteiz.org)  
Maite Álvarez-Álvarez - [maite.alvarez@ehu.es](mailto:maite.alvarez@ehu.es)  
Ana Molano Salazar - [psimolano@yahoo.es](mailto:psimolano@yahoo.es)  
Rocio Bereincua Gandarias - [rocio.bgan@yahoo.es](mailto:rocio.bgan@yahoo.es)  
Sandra Inglés Borda - [sibcat02@yahoo.es](mailto:sibcat02@yahoo.es)  
Juan María Uterga Valiente - [JUANMARIA.UTERGAVALIENTE@osakidetza.net](mailto:JUANMARIA.UTERGAVALIENTE@osakidetza.net)  
Begoña Indakoetxea Juanbeltz - [bindakoetxeaj@meditex.es](mailto:bindakoetxeaj@meditex.es)  
María Ángeles Gómez Beldarraín - [mariaangeles.gomezeldarraín@osakidetza.net](mailto:mariaangeles.gomezeldarraín@osakidetza.net)  
Josefa Moraza López - [m.j.moraza@gmail.com](mailto:m.j.moraza@gmail.com)  
Myriam Barandiarán Amillano - [MYRIAM.BARANDIARANAMILLANO@osakidetza.net](mailto:MYRIAM.BARANDIARANAMILLANO@osakidetza.net)  
Marian M. de Pancorbo - [marianpancorbo@gmail.com](mailto:marianpancorbo@gmail.com)

## ABSTRACT

**Objectives:** Examine the role of the single nucleotide polymorphisms (SNPs) in the estrogen receptor genes: rs9340799, rs2234693, rs2228480 (in the ESR1 gene) and rs4986938 (in the ESR2 gene) as a risk factor for amnesic mild cognitive impairment (MCI) and Alzheimer's disease (AD) and its possible association with APOE gene

**Design:** We have investigated the independent and combined association of different alleles of the estrogen receptor genes and APOE\* $\epsilon$ 4 allele with cognitive impairment by using a case-control design.

**Setting:** Subjects were prospectively recruited from the Neurology Departments of several Basque Country hospitals.

**Participants:** This study comprised 816 Caucasian subjects that were aged 50 years and older: 204 MCIa, 350 sporadic AD patients and 262 healthy controls,

**Primary and secondary outcome measures:** Clinical criteria and neuropsychological tests were used to establish the diagnostic groups (MCIa, AD and healthy controls). A dichotomous variable was used for each allele and genotype and the association with MCI and AD was established using Logistic Regression Models.

**Results:** Neither alleles nor genotypes of SNPs rs9340799, rs2234693, rs2228480 and rs4986938 of estrogen receptor genes (ESR1 and ESR2) are independently associated with the risk of MCIa or AD. However, the genetic profile created with the combination of the less represented alleles of these SNPs (expressed as XPAA) was associated with an increased risk for MCIa (OR= 3.30, 95%CI 1.28-8.54, p=0.014) and AD (OR= 5.16, 95% CI 2.19-12.14, p<0.001) in women APOE\* $\epsilon$ 4 allele carriers.

**Conclusions:** The less represented alleles of SNPs studied are associated with DCLa y AD in subjects APOE\*E4 carriers. Particularly, the genetic profile created with the less represented alleles of ESR1 and ESR2 SNPs are associated with an increased risk for MCIa and AD in women APOE $\epsilon$ 4 allele carriers.

## ARTICLE SUMMARY

### Article focus:

- Alzheimer's disease's aetiology is complex and multifactorial
- Estrogen receptors have several polymorphisms that seem to be related with the effect of the main risk factor to Alzheimer disease (AD), the APOE gene.
- The aim of the study is to examine the role of the single nucleotide polymorphisms (SNPs): rs9340799, rs2234693, rs2228480 and rs4986938 as a risk factor for mild cognitive impairment (MCI) and AD and its possible association with APOE gene

### Key message

- APOE\* $\epsilon$ 4 allele is an independent risk factor for the AD population, and this risk is highest for women
- rs9340799, rs2234693, rs2228480 and rs4986938 are not independently associated with the risk of MCI and AD

- The less represented alleles of SNPs studied are associated with MCI and AD in subjects APOE\*E4 carriers

#### Strengths and limitations of this study

- It was one of the first studies to investigate an association between polymorphisms of ER and cognitive function not only in AD patients, but also in MCI.
- It is a multicenter study with a patient sample that allows gender stratification.
- The study population comes from the hospital setting. A community-based study could provide more information.
- The levels of estradiol and the previous estrogen replacement therapy were unknown.

## INTRODUCTION:

Alzheimer's disease (AD) is the most common form of dementia, currently affecting over 9 million americans and europeans, its ethiology is complex and multifactorial. Several genes associated with sporadic and familial AD have been identified, but it is estimated that probably more than 50% of genetic risk remains unidentified [1].

The apolipoprotein E gene (*APOE*) is a genetic factor closely related to late onset AD disease, and constitutes a strong independent risk factor for sporadic AD [2]. Women have a slightly higher risk of AD compared to men [3]. However, the *APOE* gene explains only a fraction of the genetic risk associated with AD, and it is possible that other genes or metabolic factors may modify the *APOE* effect to initiate the pathogenesis of AD.

In the last years genetic research has focused on identifying common population polymorphism loci, not only *APOE*, but also other genes such as *CLU*, *CRI*, *PICALM* and *EXOC3L2* have been associated with an increased risk for developing AD [4-7]. Strikingly, although these genes have a significant effect on the risk of AD, risks differ by more than two orders of magnitude lower than *APOE*.

Estrogens are pleiotropic hormones having an influence not only on reproductive system but also in central nervous system (CNS). These hormones are synthesized by ovaries and by glia in CNS having a wide spectrum of effects such as neuroprotective and antiapoptotic [8-10]. Synaptogenic effects of estradiol-17-Beta have been demonstrated in the adult mammalian brain, low levels of estradiol are correlated with lower synapse density, while high estradiol levels are correlated with a higher density of synapses in the hippocampal region and dendritic spine density in CA1 pyramidal cells [11, 12]. Among other positive effects of estrogens[13], estradiol-17-Beta has an effect on 1) the maintenance and increase of the neurotransmitter systems, 2) the APP processing, Aβ levels and factors that alter its clearance and aggregation [14], 3) mechanisms of oxidative damage [15], Low endogenous estrogen levels have been broadly related with the increased risk of Alzheimer's in postmenopausal women. However, despite the initial data [16-19], there is disagreement regarding hormonal replacement therapy [20, 21].

Furthermore, it has also described an interaction with apolipoprotein E (ApoE). Estradiol increased ApoE levels and neurite outgrowth. ApoE2 isoform increased neurite length more than ApoE3 isoform in the presence of estradiol-17-Beta. The hormone had no effect on neurite outgrowth from mice lacking the *APOE* gene or when only ApoE4, the isoform that is associated with increased risk of neurological disease, was exogenously supplied [22]. These data support the hypothesis that *APOE* gene plays an integral role in the neurotrophic effects of estradiol-17-Beta, and the presence of a probable synergism between ApoE subtype expression and the effects of estrogens.

The mechanism through which estrogens exert its neuroprotective and anti-neurodegenerative effects in the CNS is poorly understood overall are mediated by two estrogen receptors (ERs), ERα and ERβ

1  
2  
3 (coded by *ESR1* and *ESR2* genes). ERs are located throughout the brain, especially in hippocampus  
4 and amygdala [23, 24], regions involved in memory and learning process. Thus, genetic variants in ER  
5 genes have been studied in relation to EA. There are several polymorphic loci in intron 1 of *ESR1* gene,  
6 highlighting the PvuII and XbaI locus [25]. These loci may influence the expression of *ESR1* gene; xp  
7 haplotype has higher expression than the XP one, but with no significant differences [26]. Several studies,  
8 [27-29] but not all [26] have found an increased frequency of the PvuII and XbaI *ESR1* polymorphisms in  
9 AD patients.

10 Other interesting SNP is rs2228480, this polymorphism is the coding synonymous variant at codon 594  
11 (rs2228480) within the last exon of the gene *ESR1* gene. This variant is thought to play a role in  
12 distinguishing between the receptor agonist or antagonists binding to the receptor molecule [30]. In  
13 addition, this SNP has been associated with neurodegenerative disorders and the mechanism of this  
14 association may involve alternative gene regulation and transcript processing [31].

15 Other studies have shown an association between several polymorphisms of *ESR2* gene and late onset AD,  
16 and they found that variations in this gene could modify disease susceptibility [32]. The polymorphism  
17 located in 3'UTR of *ESR2* gene, rs4986938, has been associated with the onset of Parkinson disease [33]  
18 and the susceptibility for VaD in an Israeli cohort, but not with AD [34]. In the study of Dresener-Pollack  
19 et al. (2009), VAD is differentiated from AD by clinical criteria, but in the absence of imaging data, the  
20 potential for misclassification is high. Thus, results should be confirmed.

21 To date no studies have been conducted in the prodromal stages of EA such as mild cognitive impairment  
22 of amnesic type (MCIa). Such studies could provide information on the beginning of the disease process,  
23 helping to ensure that suitable therapeutic measures are implemented at an early stage.

24 According to the above, the aim of the present study was to determine whether the *ESR1* and *ESR2* genes  
25 are linked to the risk of MCIa; whether there is an interaction with *APOE* gene; and whether such  
26 interaction could influence the risk of AD and MCIa. Our hypothesis is that the association of the *ESR1*  
27 and *ESR2* genes with cognitive impairment may exist only in  $\epsilon 4$  status carriers. We have studied this  
28 association in AD patients and in MCIa patients, the latter condition possibly representing a prodrome for  
29 dementia of AD type [35].

30 With the purpose of examining the association of the *ESR1* and *ESR2* genes involved in estrogen  
31 metabolism, as a genetic risk factor for cognitive impairment, we conducted a study on a sample of  
32 patients with MCIa, AD and a control group. All subjects were analysed for the *ESR1* (rs9340799,  
33 rs2234693 and rs2228480) and *ESR2* (rs4986938) polymorphisms and *APOE* genotype.

## 34 **METHODS:**

35 This study comprised 816 caucasian subjects, included in 3 groups: MCIa patients (n=204), AD patients  
36 (n=350) and healthy controls (n=262). Subjects were prospectively recruited from the Neurology  
37 Departments of several hospitals. Participants were aged 50 years and older. For AD and MCIa patients,  
38 evaluation also included routine blood tests: haematology, biochemistry, thyroid-stimulating hormone,  
39 vitamin B12 levels, syphilis serology and neuroimaging test (CT scan or MRI).

40 The subjects were evaluated using a broad battery of neuropsychological tests: Minimal State  
41 Examination, Clinical Dementia Rating scale, CERAD protocol, Stroop test, unilateral and bilateral motor  
42 praxis, 7-minute test, trail making part A and B; and Neuropsychiatric Inventory (NPI).

43 Based upon the results of these evaluations, the participants were classified into the following groups:  
44 MCIa patients, AD patients and healthy control subjects.

45 The diagnosis of MCIa patients was based on Petersen's criteria [35, 56]. Patients had memory  
46 complaints corroborated by an informant, representing a decline from a previous level of functioning  
47 given their age and educational level. The score in CDR scale was required to be  $\geq 0.5$ , and performance in  
48 relation to other cognitive functions and daily living activities were required to be normal. The diagnosis  
49

of AD was based on the DSM IV [57] and NINCDS-ADRDA [58] criteria for probable and possible AD. Patients with a total score of less than 3 on CDR scale (mild to moderate dementia) were included.

Healthy control subjects scored within the normal ranges for age and educational level in psychometric testing, with a CDR score of 0.

The exclusion criteria included: severe comorbidities making adequate follow-up unlikely, acute psychiatric diseases, previous cerebrovascular diseases (transient ischemic attacks, stroke or intracranial haemorrhage), other neurodegenerative diseases, and the absence of a reliable informant.

A specific database was designed and declared to the Spanish Data Protection Agency. The study was approved by the Ethics Committee of Cruces Hospital (Barakaldo, Spain). All patients signed informed consent to undergo the examination. The study was conducted in accordance with the Declaration of Helsinki concerning medical research in human subjects.

### Genetic analysis:

At the first visit, peripheral blood samples were collected at EDTA vacuum tubes from all individuals. Genomic DNA was extracted by proteolytic lysis from white blood cells using standard phenol/chloroform extraction method.

APOE gene was amplified by PCR with the primers 112F and 158R, under the PCR conditions described by Wilton and Lim [59]. Digestion of the amplified product was carried out with Hae II and Afl III, as described by Álvarez-Álvarez et al. (2003)[60].

Three single nucleotide polymorphisms (SNPs) in the ESR1 gene (rs9340799, rs2234693 and rs2228480) and one SNP in the ESR2 gene (rs4986938) were evaluated. First two SNPs in ESR1 (rs9340799 and rs2234693) are in intron 1 and are separated by only 46 base pairs. The rs9340799 polymorphism marks an A→G transition 351 nucleotides upstream in intron 1 (also known as c.454-351A>G). Those with the G allele have an absent XbaI site which has previously been called X in the literature, with the A allele denoted by x. The rs2234693 polymorphism is characterized by a T→C transition 397 nucleotides upstream in the intron (also known as c.454-497T>C) that obliterates the PvuII restriction site. The T allele has previously been called the p allele, while the C allele has been called the P allele, denoting the absence of the PvuII restriction site. Subjects were described as XX, xx, PP, pp, homozygotes; and Xx or Pp heterozygotes.

Taqman SNP Genotyping Assays were used to analyse polymorphism rs2228480; G>A (SNP1) of ESR1 gen and polymorphism rs4986938; G>A (SNP2) of ESR2 gen.

SNP genotypes of candidate genes (ESR1 and ESR2) and APOE gene were analysed blinded to clinical diagnosis.

The less frequent alleles of each SNP were evaluated such as a combined genotype (XPAA). Therefore with the name of XPAA we are referring all haplotypes with at least one X allele (rs9340799), one P allele (rs2234693), one A allele (rs2228480) and one A allele (rs4986938).

### Statistical analyses

Genepop version 4.0 was used to test the goodness of the fit to the Hardy-Weinberg equilibrium by means of the Guo-Thompson exact test for all three groups studied [61]. The G test was also used to check the differences between demographic and clinical variables, allele frequencies and genotype frequencies.

Statistical analysis was also performed using the SPSS® package, version 15.0. A dichotomous variable was used for each polymorphism: “yes” or “no” for “carrier” or “non carrier” of the APOE\*ε4 allele and for different alleles and genotypes of the SNPs in candidate genes (ESR1 and ESR2 genes).

Several multinomial regression models were created in order to determine the independent effect of X, P and SNP1-A alleles of ESR1 gen and SNP2-A allele of ESR2 gen in the total sample and in the absence of APOE\*ε4 allele. The effect of APOE\*ε4 allele in the total sample and in the different diagnostic groups was also calculated. Another model was created to assess the combined effect of different polymorphism of ESR1 and ESR2 genes and the APOE\*ε4 allele, based on the hypothesis that the effect of estrogens might exist only in APOE\*ε4 allele carriers.

Because age and gender could be associated with the frequency of some polymorphisms, we adjusted our analysis for these covariates in total sample. P-values of less than 0.05 were considered statistically significant.

## RESULTS:

We have investigated the independent and combined association of X, P and SNP1-A alleles of ESR1 gen and SNP2-A allele of ESR2 gen and APOE\*ε4 allele by using a case-control design.

In the present study we analysed a sample of 204 MCIa patients, 350 AD patients, and 262 healthy control subjects without significant differences in terms of age ( $p>0.05$ ). There was, however, a significant difference in the MMSE score between groups ( $p<0.05$ ), (Table 1).

**Table 1.** Baseline Demographic

| Group    | n   | Age <sup>a</sup> | Women (%) <sup>b</sup> | MMSE <sup>c</sup> |
|----------|-----|------------------|------------------------|-------------------|
| MCIa     | 204 | 70,25 ± 8,6      | 61,3                   | 26.38 ± 2.05      |
| AD       | 350 | 72,17 ± 8,3      | 71,1                   | 19.68 ± 4.60      |
| CONTROLS | 262 | 74,00 ± 9,6      | 59,5                   | 28.45 ± 1.63      |

<sup>a</sup> Years, mean ± Standard Deviation (S.D.). <sup>b</sup> % of Women in group. <sup>c</sup> MMSE score, mean ± S.D.

Table 2 shows the allele and genotype frequencies of ESR1 and ESR2 polymorphisms and APOE gene in MCIa, AD and controls. In all studied groups, frequencies were in Hardy-Weinberg equilibrium ( $p>0.05$ ).

**Table 2.** Allelic and genotypic frequency.

| <i>ESR1</i>      |         |                |              |                    |
|------------------|---------|----------------|--------------|--------------------|
|                  | Xbal    | MCIa (N = 204) | AD (N = 350) | CONTROLS (N = 262) |
| Allele           | X       | 0.426          | 0.409        | 0.395              |
|                  | x       | 0.574          | 0.591        | 0.605              |
| Genotype         | XX      | 0.157          | 0.154        | 0.156              |
|                  | Xx      | 0.539          | 0.509        | 0.477              |
|                  | xx      | 0.304          | 0.337        | 0.366              |
| H-W <sup>a</sup> | p-Value | 0.197          | 0.376        | 1.000              |
|                  | Pvull   |                |              |                    |

|  |                        |                |       |       |       |
|--|------------------------|----------------|-------|-------|-------|
|  | <b>Allele</b>          | <b>P</b>       | 0.488 | 0.480 | 0.462 |
|  |                        | <b>p</b>       | 0.512 | 0.520 | 0.538 |
|  | <b>Genotype</b>        | <b>PP</b>      | 0.225 | 0.209 | 0.214 |
|  |                        | <b>Pp</b>      | 0.525 | 0.543 | 0.496 |
|  |                        | <b>pp</b>      | 0.250 | 0.249 | 0.290 |
|  | <b>H-W<sup>a</sup></b> | <b>p-Value</b> | 0.575 | 0.110 | 1.000 |
|  |                        | <b>SNP1</b>    |       |       |       |
|  | <b>Allele</b>          | <b>A</b>       | 0.191 | 0.189 | 0.174 |
|  |                        | <b>G</b>       | 0.809 | 0.811 | 0.826 |
|  | <b>Genotype</b>        | <b>AA</b>      | 0.039 | 0.037 | 0.030 |
|  |                        | <b>AG</b>      | 0.304 | 0.303 | 0.286 |
|  |                        | <b>GG</b>      | 0.657 | 0.660 | 0.684 |
|  | <b>H-W<sup>a</sup></b> | <b>p-Value</b> | 0.818 | 0.861 | 1.000 |
|  | <b>ESR2</b>            |                |       |       |       |
|  |                        | <b>SNP2</b>    |       |       |       |
|  | <b>Allele</b>          | <b>A</b>       | 0.424 | 0.419 | 0.378 |
|  |                        | <b>G</b>       | 0.576 | 0.581 | 0.622 |
|  | <b>Genotype</b>        | <b>AA</b>      | 0.201 | 0.189 | 0.133 |
|  |                        | <b>AG</b>      | 0.446 | 0.460 | 0.489 |
|  |                        | <b>GG</b>      | 0.353 | 0.351 | 0.378 |
|  | <b>H-W<sup>a</sup></b> | <b>p-Value</b> | 0.245 | 0.325 | 0.591 |
|  | <b>APOE</b>            |                |       |       |       |
|  | <b>Allele</b>          | <b>2</b>       | 0.027 | 0.034 | 0.057 |
|  |                        | <b>3</b>       | 0.743 | 0.665 | 0.842 |
|  |                        | <b>4</b>       | 0.230 | 0.301 | 0.101 |
|  | <b>Genotype</b>        | <b>2,2</b>     | 0.000 | 0.000 | 0.008 |
|  |                        | <b>2,3</b>     | 0.044 | 0.046 | 0.092 |
|  |                        | <b>2,4</b>     | 0.010 | 0.017 | 0.008 |
|  |                        | <b>3,3</b>     | 0.574 | 0.434 | 0.698 |
|  |                        | <b>3,4</b>     | 0.294 | 0.420 | 0.195 |
|  |                        | <b>4,4</b>     | 0.078 | 0.083 | 0.000 |
|  | <b>H-W<sup>a</sup></b> | <b>p-Value</b> | 0.217 | 0.814 | 0.102 |



**Genetic Profile**

|                |       |       |       |
|----------------|-------|-------|-------|
| <b>XPAA(+)</b> | 0.709 | 0.708 | 0.674 |
| <b>XPAA(-)</b> | 0.291 | 0.292 | 0.326 |

*a Hardy-Weinberg probability test.*

There were no significant differences in allele and genotype frequencies in MCIa and AD compared to controls for ESR1 and ESR2 gene polymorphisms, while the differences proved significant for APOE gene (Table 3).

**Table 3.** Exact G test

| <b>Xbal<sup>a</sup></b>  |                |                         | <b>Xbal<sup>b</sup></b>  |                |                         |
|--------------------------|----------------|-------------------------|--------------------------|----------------|-------------------------|
|                          | <b>P-value</b> | <b>S.E.<sup>c</sup></b> |                          | <b>P-value</b> | <b>S.E.<sup>c</sup></b> |
| <b>MCI vs CTL</b>        | 0.339          | 0.006                   | <b>MCI vs CTL</b>        | 0.336          | 0.004                   |
| <b>MCI vs AD</b>         | 0.571          | 0.005                   | <b>MCI vs AD</b>         | 0.564          | 0.004                   |
| <b>AD vs CTL</b>         | 0.638          | 0.005                   | <b>AD vs CTL</b>         | 0.635          | 0.004                   |
| <b>PvuII<sup>a</sup></b> |                |                         | <b>PvuII<sup>b</sup></b> |                |                         |
|                          | <b>P-value</b> | <b>S.E.<sup>c</sup></b> |                          | <b>P-value</b> | <b>S.E.<sup>c</sup></b> |
| <b>MCI vs CTL</b>        | 0.479          | 0.006                   | <b>MCI vs CTL</b>        | 0.464          | 0.004                   |
| <b>MCI vs AD</b>         | 0.853          | 0.002                   | <b>MCI vs AD</b>         | 0.846          | 0.002                   |
| <b>AD vs CTL</b>         | 0.562          | 0.006                   | <b>AD vs CTL</b>         | 0.548          | 0.005                   |
| <b>SNP1<sup>a</sup></b>  |                |                         | <b>SNP1<sup>b</sup></b>  |                |                         |
|                          | <b>P-value</b> | <b>S.E.<sup>c</sup></b> |                          | <b>P-value</b> | <b>S.E.<sup>c</sup></b> |
| <b>MCI vs CTL</b>        | 0.483          | 0.005                   | <b>MCI vs CTL</b>        | 0.491          | 0.004                   |
| <b>MCI vs AD</b>         | 0.935          | 0.002                   | <b>MCI vs AD</b>         | 0.935          | 0.001                   |
| <b>AD vs CTL</b>         | 0.532          | 0.011                   | <b>AD vs CTL</b>         | 0.552          | 0.007                   |
| <b>SNP2<sup>a</sup></b>  |                |                         | <b>SNP2<sup>b</sup></b>  |                |                         |
|                          | <b>P-value</b> | <b>S.E.<sup>c</sup></b> |                          | <b>P-value</b> | <b>S.E.<sup>c</sup></b> |
| <b>MCI vs CTL</b>        | 0.180          | 0.009                   | <b>MCI vs CTL</b>        | 0.153          | 0.005                   |
| <b>MCI vs AD</b>         | 0.896          | 0.003                   | <b>MCI vs AD</b>         | 0.904          | 0.003                   |
| <b>AD vs CTL</b>         | 0.139          | 0.007                   | <b>AD vs CTL</b>         | 0.173          | 0.009                   |

|            | APOE <sup>a</sup> |                   | APOE <sup>b</sup> |                   |        |
|------------|-------------------|-------------------|-------------------|-------------------|--------|
|            | P-value           | S.E. <sup>c</sup> | P-value           | S.E. <sup>c</sup> |        |
| MCI vs CTL | 0.000             | <0.001            | MCI vs CTL        | 0.000             | <0.001 |
| MCI vs AD  | 0.033             | 0.002             | MCI vs AD         | 0.033             | 0.002  |
| AD vs CTL  | 0.000             | <0.001            | AD vs CTL         | 0.000             | <0.001 |

*a Allelic frequency. b Genotypic frequency. c Standard Error*

In order to determine whether the less represented alleles of SNPs in candidate genes (ESR1 and ESR2 genes) were an independent risk factor for MCI and AD, we selected a subgroup of MCI and AD and control individuals with the presence of at least one of these alleles. None of them had a significant effect (data not shown).

In the total sample, APOE\*ε4 allele is a risk factor for cognitive impairment; the odds ratios (ORs) of developing MCI and AD were 2.44 (95%CI 1.61-3.69, p<0.001) and 4.23 (95%CI 2.93-6.12, p<0.001), respectively (Table 4). The higher risk conferred by APOE\*ε4 allele was observed even when the samples were subgrouped by sex, but in AD women the risk was higher than in men, 4.85 (95%CI 3.04-7.73, p<0.001) versus 3.19 (95%CI 1.73-5.88, p<0.001).

**Table 4.** Risk Factors for MCI and AD from Logistic Regression Models

| Global Effects               | MCI              |        | AD                |        |
|------------------------------|------------------|--------|-------------------|--------|
|                              | OR CI95%         | p      | OR CI95%          | p      |
| X (+) <sup>a</sup>           | 1.39 (0.93-2.06) | 0.104  | 1.18 (0.85-1.67)  | 0.324  |
| P (+) <sup>b</sup>           | 1.25 (0.82-1.90) | 0.293  | 1.26 (0.88-1.23)  | 0.205  |
| SNP1-A <sup>c</sup>          | 1.14 (0.76-1.71) | 0.506  | 1.13 (0.78-1.62)  | 0.510  |
| SNP2-A <sup>d</sup>          | 1.05 (0.71-1.54) | 0.304  | 1.08 (0.77-1.51)  | 0.649  |
| E4 (+) <sup>e</sup>          | 2.44 (1.61-3.69) | <0.001 | 4.23 (2.93-6.12)  | <0.001 |
| Women                        | 1.07 (0.73-1.56) | 0.705  | 1.67 (1.19-2.35)  | 0.003  |
| E4 (+)*Women <sup>f</sup>    | 2.27 (1.32-3.87) | 0.003  | 4.85 (3.04-7.73)  | <0.001 |
| E4 (+)*Men <sup>g</sup>      | 2.74 (1.43-5.23) | 0.002  | 3.19 (1.73-5.88)  | <0.001 |
| <b>Independent Effects</b>   |                  |        |                   |        |
| X (+) E4(-) <sup>h</sup>     | 1.04 (0.65-1.66) | 0.863  | 1.18 (0.76-1.81)  | 0.452  |
| P (+) E4(-) <sup>h</sup>     | 0.86 (0.52-1.40) | 0.545  | 1.19 (0.754-1.90) | 0.444  |
| SNP1-A(+)*E4(-) <sup>h</sup> | 1.19 (0.74-1.92) | 0.469  | 1.13 (0.73-1.76)  | 0.568  |
| SNP2-A(+)*E4(-) <sup>h</sup> | 1.03 (0.65-1.66) | 0.879  | 1.07 (0.70-1.64)  | 0.758  |
| <b>ESR1</b>                  |                  |        |                   |        |

| <b>Combined Effects</b>       |                   |        |                   |        |
|-------------------------------|-------------------|--------|-------------------|--------|
| E4(+)*X <sup>i</sup>          | 3.17 (1.80-5.59)  | <0.001 | 5.07 (3.00-8.55)  | <0.001 |
| E4(+)*P <sup>i</sup>          | 2.74 (1.55-4.85)  | 0.001  | 5.35 (3.11-9.17)  | <0.001 |
| E4(+)*SNP1-A <sup>i</sup>     | 2.53 (1.31-4.90)  | <0.001 | 4.44 (2.48-7.93)  | <0.001 |
| <b>ESR2</b>                   |                   |        |                   |        |
| <b>Combined Effects</b>       |                   |        |                   |        |
| E4(+)*SNP2-A <sup>i</sup>     | 2.77 (1.55-4.93)  | 0.001  | 4.87 (2.91-8.17)  | <0.001 |
| <b>Genetic Profile (XPAA)</b> |                   |        |                   |        |
| <b>Independent Effects</b>    |                   |        |                   |        |
| XPAA*E4(-) <sup>j</sup>       | 1.31 (0.48-3.54)  | 0.590  | 1.19 (0.49-2.91)  | 0.696  |
| XPAA(-)*E4(+) <sup>k</sup>    | 2.53 (1.61-3.93)  | <0.001 | 4.32 (2.91-6.40)  | <0.001 |
| <b>Combined Effects</b>       |                   |        |                   |        |
| XPAA*E4(+) <sup>l</sup>       | 3.30 (1.28-8.54)  | 0.014  | 5.16 (2.19-12.14) | <0.001 |
| XPAA*E4(+)*Women <sup>m</sup> | 3.84 (1.09-13.57) | 0.036  | 8.04 (2.60-24.80) | <0.001 |
| XPAA*E4(+)*Men <sup>m</sup>   | 3.20 (0.73-14.11) | 0.124  | 3.57 (0.88-14.47) | 0.075  |

<sup>a</sup> Sample selected by at least one X of RFLP Xbal. <sup>b</sup> Sample selected by at least one P of RFLP PvuII. <sup>c</sup> Sample selected by at least one A allele of rs2228480. <sup>d</sup> Sample selected by at least one A allele of rs4986938. <sup>e</sup> Sample selected by at least one E4 allele of APOE gene. <sup>f</sup> Women selected by at least one E4 allele of APOE gene. <sup>g</sup> Men selected by at least one E4 allele of APOE gene. <sup>h</sup> Sample selected by at least one allele that is indicated and the absence of E4 allele of APOE gene. <sup>i</sup> Sample selected by at least one E4 allele of APOE gene and one of the alleles that is indicated. Reference category was sample control. <sup>j</sup> Sample selected by absence of E4 allele of APOE gene and the presence of XPAA. <sup>k</sup> Sample selected by absence of XPAA and the presence by at least one E4 allele of APOE gene. Sample selected by at least one E4 allele of APOE gene and the presence XPAA. <sup>l</sup> Sample selected by at least one E4 allele of APOE gene and the presence of XPAA. <sup>m</sup> Women or Men selected by at least one E4 allele of APOE gene and the presence of XPAA. \* In all models reference category was sample control

Aiming to avoid the combined effect of the less represented alleles of SNPs in candidates genes and APOE\*ε4 allele, we analysed the risk of MCIa and AD according to the presence of X, P, SNP1-A and SNP2-A alleles and the absence of one APOE\*ε4 allele. We did not found a significant effect, even when the samples were subgrouped by sex (data not shown).

We further evaluated a possible synergistic effect between the less represented alleles of SNP in candidates genes and APOE\*ε4 allele by using a multivariate logistic regression model. To analyse this effect, we subgrouped the subjects according to the presence of X, P, SNP1-A and SNP2-A alleles and at least one APOE\*ε4 allele. A slight increase in nominal risk of MCI and AD was observed.

In order to analyse the combined effect between estrogen polymorphisms, we created a genetic profile with the less represented alleles of these SNPs, expressed as XPAA. We did not found a significant risk in the absence of one APOE\*ε4 allele, but analysing the combined effect of XPAA with APOE\*ε4 allele, ORs were as follows: MCIa, OR= 3.30 (95%CI 1.28-8.54, p=0.014) and AD, OR= 5.16 (95%CI 2.19-

12.14,  $p < 0.001$ ), these ORs were even greater than the independent effect of APOE\* $\epsilon$ 4 allele with XPAA(-) (absence of this genetic profile). However when the samples were subgrouped by sex, MCIa and AD women showed an increased OR, 3.84 (95%CI 1.09-13.57,  $p < 0.036$ ) and 8.04 (95%CI 2.60-24.80,  $p < 0.001$ ) respectively, comparing with men.

## DISCUSSION

Our study shows that neither alleles nor genotypes of SNPs rs9340799 (A>G; XbaI), rs2234693 (PvuII; C>T) and rs2228480 (A>G) (*ESR1* gene) and SNP rs4986938 (A>G) (*ESR2* gene) are independently associated with the risk of MCIa or AD. The less represented alleles of SNPs in candidate genes (*ESR1* and *ESR2* genes) were not an independent risk factor for MCIa and AD in absence of APOE\* $\epsilon$ 4. Furthermore, the genetic profile created with the less represented alleles of SNPs in candidate genes were associated with an increased risk for MCIa and AD in women APOE\* $\epsilon$ 4 allele carriers.

In our series, APOE\* $\epsilon$ 4 allele seems to be an independent risk factor for the AD population, and this risk is highest for women. The APOE\* $\epsilon$ 4 allele also constitutes a risk factor for MCIa patients.

On evaluating the combined effect of the APOE\* $\epsilon$ 4 allele in the presence of alleles or genotypes of *ESR1* and *ESR2* SNPs the risk for AD remains significant; though this association did not confer a relevant additional risk of MCIa and AD.

When we created a genetic profile with the less represented alleles of *ESR1* and *ESR2* SNPs, expressed as XPAA, we did not find a significant risk in the absence of one APOE\* $\epsilon$ 4 allele. However, the presence of XPAA and at least one APOE\* $\epsilon$ 4 allele increases the risk in MCIa and AD women.

Nowadays the most well-known polymorphism of *ESR1* gene related with AD are SNPs rs9340799 (A>G; XbaI) and rs2234693 (PvuII; T>C). Regarding the association between XbaI with AD, several studies show that *ESR1* XbaI polymorphism is an additional risk factor [27, 36-38]. However, other studies have not found this association [29, 39-42]. These results and several meta-analysis [1, 43] suggested that *ESR1* gene polymorphisms might be related to the individual susceptibility to AD, especially in the females.

Concerning the association between *ESR1* PvuII polymorphism with AD, several published studies have shown a great heterogeneity. In some of them no association has been found [26, 39, 40, 42, 44]. Other studies claimed a protective role of P allele of *ESR1* PvuII polymorphism [29, 37, 38], whereas others found an opposite effect [27, 28, 36, 45-47]. Some studies [36] have established an association between *ESR1* PP and XX genotypes with an increased risk for AD only in males (OR = 3.6, 95% CI = 1.2-10.9) and conferred a relevant additional risk of AD to subjects also carrying APOE\* $\epsilon$ 4 allele, and in AD women. In this last study *ESR1* PP and XX genotypes were also associated with lower MMSE values ( $p = 0.0007$ ). This data suggests that the involvement of *ESR1* polymorphisms (XbaI and PvuII) in AD onset is mediated by the regulation of *APOE* expression. Our data support this hypothesis, in accordance with the increased risk of MCI and AD observed in patients with APOE \*  $\epsilon$ 4 allele.

In our knowledge, this is the first study to show evidences in support of the association of SNP rs2228480 with MCI and AD patients APOE\* $\epsilon$ 4 allele carriers. Previously, this SNP only has been linked to the alternative regulation and transcript processing of *ESR1* gene [31, 48]. To date had not been provided other information in relation to neurodegenerative disorders.

Regarding polymorphisms of *ESR2* gen, several studies have been published with conflicting results: susceptibility for vascular dementia (VaD) but not for sporadic AD in elderly Jewish women was found in *ESR2* rs4986938 polymorphism [34]. Pirskanen et al. (2005)[32] found that some gene variants of *ESR2* gen are associated with increased risk of AD in women (rs1271573 T/T genotype and rs1256043 T/T genotype) while others not (IVS31842, rs4986938). Lambert et al. (2001) [40] found no independent association of these polymorphisms with the risk of developing AD. One study suggests the *ESR2* allele 5 seems to be a protective factor [49]. Meta-analyses have not been performed on the following polymorphisms of *ESR2* gen since they lack published genotype data or the published genotype data was

not eligible for inclusion. Other studies [50] have not detected a significant gene-gene interaction between *ESR1*, *ESR2* SNPs and *APOE* status but the analysis was performed in late onset AD.

In contrast with previous studies we have analysed the genetic profile of the less represented alleles of *ESR1* and *ESR2* gene polymorphisms, XPAA; when considering the XPAA isolatedly, the genetic profile was not an independent risk factor for MCIa and AD, but the combined effect with *APOE*\* $\epsilon$ 4 allele confers an increased risk in women, whereas it does not contribute to the disease susceptibility in men. According to our results, some variations in the ER genes in synergy with *APOE*\* $\epsilon$ 4 allele may be associated with an increased risk of MCIa and AD in women.

Our results may suggest that the risk for MCIa and AD may be modulated only when both *ESR1* and *ESR2* genes have several polymorphisms, which might be related to their expression and biological activities. The variations in the ERs genes may involve alternative gene regulation and transcript processing in the brain [31]. *APOE* gene expression can be differentially regulated depending on activation of ER subtypes. A recent study [15] demonstrated that activation of *ESR1* gene up-regulated *APOE*\* $\epsilon$ 4 mRNA and protein expression in hippocampus. In contrast, activation of *ESR2* gene down-regulated the mRNA and protein expression of *APOE*. Thus, it is expected lower regulation in postmenopausal women [51], conferring less protection against the effect of *APOE*\* $\epsilon$ 4 allele.

Estrogens have been shown to affect amyloid precursor protein metabolism, by increasing the secretory metabolism of amyloid protein precursor (*APP*). Estrogens are also a potent factor that not only prevents vascular disease but also improves blood flow, including blood flow in regions on the brain affected by AD [52]. Synaptic sprouting by estradiol in a model of AD may operate via an *APOE*\* $\epsilon$ 4-dependent mechanism [53]. Cholinergic neurons that are implicated in cognitive functions may be regulated by estrogens. The distribution of ERs corresponds to that of cholinergic system [54]. The important decrease in endogenous estrogen levels after menopause may contribute to the development of AD [55]. Despite the protective effect of estrogens upon AD, this effect might to be modified by ERs polymorphisms, particularly in *APOE*\* $\epsilon$ 4 allele carriers. Thus, the current state of knowledge of the role of estrogens for preventing dementia in postmenopausal women should be reviewed.

The strengths of our study are its multicenter nature including AD patients, healthy controls, and MCIa patients. In our knowledge, ours is the first study to investigate and association between polymorphisms of ER (rs9340799, rs2234693, rs2228480 and rs4986938) and cognitive function not only in AD patients, but also in MCIa. Moreover, the patient sample is not small, allowing gender stratification.

Some limitations to our study must be addressed. The study population comes from the hospital setting. A community-based study could provide more information. The serum levels of estradiol have not been measured, and we do not know whether the patients received ERT in the last years. We also include a sample of patients with MCIa, this stage is probably a heterogeneous clinical entity. But, the broad battery of neuropsychological test used in our sample might ensure a highest homogeneity.

## CONCLUSIONS

In our study, *APOE*\* $\epsilon$ 4 allele is an independent risk factor for MCIa and AD patients. The combined effect of the *APOE*\* $\epsilon$ 4 allele and the less represented alleles of *ESR1* and *ESR2* SNPs remains the risk for MCIa and AD; although this association does not confer a relevant additional risk of AD and MCIa. Furthermore, the genetic profile with the less represented alleles of *ESR1* and *ESR2* gene polymorphisms, expressed as XPAA, did not increased the risk of cognitive impairment in the absence of one *APOE*\* $\epsilon$ 4 allele, but the presence of XPAA and at least one *APOE*\* $\epsilon$ 4 allele increases the risk in MCIa and AD women.

**OTHER INFORMATION:****Competing interests:**

None.

**Funding:**

This work was sponsored by grants from the Federación de Asociaciones de Familiares de enfermos de Alzheimer de Euskadi, Fondo de Investigación Sanitaria del Instituto Carlos III (Madrid), Pfizer Foundation and Ayudas a la Investigación de la Obra Social de la Caja Vital Kutxa.

For peer review only

## REFERENCES

- [1] Bertram L, McQueen MB, Mullin K, Blacker D, Tanzi RE. Systematic meta-analyses of Alzheimer disease genetic association studies: the AlzGene database. *Nat Genet* 39: 17-23 (2007).
- [2] Saunders AM, Strittmatter WJ, Schmechel D, George-Hyslop PH, Pericak-Vance MA, Joo SH, et al. Association of apolipoprotein E allele epsilon 4 with late-onset familial and sporadic Alzheimer's disease. *Neurology* 43: 1467-72 (1993).
- [3] Farrer LA, Cupples LA, Haines JL, Hyman B, Kukull WA, Mayeux R, et al. Effects of age, sex, and ethnicity on the association between apolipoprotein E genotype and Alzheimer disease. A meta-analysis. APOE and Alzheimer Disease Meta Analysis Consortium. *JAMA* 278: 1349-56 (1997).
- [4] Carrasquillo MM, Belbin O, Hunter TA, Ma L, Bisceglia GD, Zou F, et al. Replication of CLU, CR1, and PICALM associations with Alzheimer disease. *Arch Neurol* 67: 961-4
- [5] Harold D, Abraham R, Hollingworth P, Sims R, Gerrish A, Hamshere ML, et al. Genome-wide association study identifies variants at CLU and PICALM associated with Alzheimer's disease. *Nat Genet* 41: 1088-93 (2009).
- [6] Lambert JC, Heath S, Even G, Campion D, Sleegers K, Hiltunen M, et al. Genome-wide association study identifies variants at CLU and CR1 associated with Alzheimer's disease. *Nat Genet* 41: 1094-9 (2009).
- [7] Seshadri S, Fitzpatrick AL, Ikram MA, DeStefano AL, Gudnason V, Boada M, et al. Genome-wide analysis of genetic loci associated with Alzheimer disease. *JAMA* 303: 1832-40 (2010).
- [8] Garcia-Segura LM, McCarthy MM. Minireview: Role of glia in neuroendocrine function. *Endocrinology* 145: 1082-6 (2004).
- [9] Hu R, Cai WQ, Wu XG, Yang Z. Astrocyte-derived estrogen enhances synapse formation and synaptic transmission between cultured neonatal rat cortical neurons. *Neuroscience* 144: 1229-40 (2007).
- [10] Marin R, Guerra B, Alonso R, Ramirez CM, Diaz M. Estrogen activates classical and alternative mechanisms to orchestrate neuroprotection. *Curr Neurovasc Res* 2: 287-301 (2005).
- [11] Hao J, Janssen WG, Tang Y, Roberts JA, McKay H, Lasley B, et al. Estrogen increases the number of spinophilin-immunoreactive spines in the hippocampus of young and aged female rhesus monkeys. *J Comp Neurol* 465: 540-50 (2003).
- [12] Woolley CS, McEwen BS. Estradiol mediates fluctuation in hippocampal synapse density during the estrous cycle in the adult rat. *J Neurosci* 12: 2549-54 (1992).
- [13] Pike CJ, Carroll JC, Rosario ER, Barron AM. Protective actions of sex steroid hormones in Alzheimer's disease. *Front Neuroendocrinol* 30: 239-58 (2009).
- [14] Amtul Z, Wang L, Westaway D, Rozmahel RF. Neuroprotective mechanism conferred by 17beta-estradiol on the biochemical basis of Alzheimer's disease. *Neuroscience* 169: 781-6
- [15] Wang X, Dykens JA, Perez E, Liu R, Yang S, Covey DF, et al. Neuroprotective effects of 17beta-estradiol and nonfeminizing estrogens against H<sub>2</sub>O<sub>2</sub> toxicity in human neuroblastoma SK-N-SH cells. *Mol Pharmacol* 70: 395-404 (2006).
- [16] Baldereschi M, Di Carlo A, Lepore V, Bracco L, Maggi S, Grigoletto F, et al. Estrogen-replacement therapy and Alzheimer's disease in the Italian Longitudinal Study on Aging. *Neurology* 50: 996-1002 (1998).

- 1  
2  
3 [17] Tang MX, Jacobs D, Stern Y, Marder K, Schofield P, Gurland B, et al. Effect of  
4 oestrogen during menopause on risk and age at onset of Alzheimer's disease. *Lancet*  
5 348: 429-32 (1996).
- 6 [18] Kawas C, Resnick S, Morrison A, Brookmeyer R, Corrada M, Zonderman A, et  
7 al. A prospective study of estrogen replacement therapy and the risk of developing  
8 Alzheimer's disease: the Baltimore Longitudinal Study of Aging. *Neurology* 48: 1517-  
9 21 (1997).
- 10 [19] Resnick SM, Metter EJ, Zonderman AB. Estrogen replacement therapy and  
11 longitudinal decline in visual memory. A possible protective effect? *Neurology* 49:  
12 1491-7 (1997).
- 13 [20] Hogervorst E, Bandelow S. Brain and cognition. Is there any case for improving  
14 cognitive function in menopausal women using estrogen treatment? *Minerva Ginecol*  
15 61: 499-515 (2009).
- 16 [21] Maki PM, Sundermann E. Hormone therapy and cognitive function. *Hum*  
17 *Reprod Update* 15: 667-81 (2009).
- 18 [22] Nathan BP, Barsukova AG, Shen F, McAsey M, Struble RG. Estrogen facilitates  
19 neurite extension via apolipoprotein E in cultured adult mouse cortical neurons.  
20 *Endocrinology* 145: 3065-73 (2004).
- 21 [23] Shughrue P, Scrimo P, Lane M, Askew R, Merchenthaler I. The distribution of  
22 estrogen receptor-beta mRNA in forebrain regions of the estrogen receptor-alpha  
23 knockout mouse. *Endocrinology* 138: 5649-52 (1997).
- 24 [24] Shughrue PJ, Lane MV, Merchenthaler I. Comparative distribution of estrogen  
25 receptor-alpha and -beta mRNA in the rat central nervous system. *J Comp Neurol* 388:  
26 507-25 (1997).
- 27 [25] Castagnoli A, Maestri I, Bernardi F, Del Senno L. PvuII RFLP inside the human  
28 estrogen receptor gene. *Nucleic Acids Res* 15: 866 (1987).
- 29 [26] Maruyama H, Toji H, Harrington CR, Sasaki K, Izumi Y, Ohnuma T, et al. Lack  
30 of an association of estrogen receptor alpha gene polymorphisms and transcriptional  
31 activity with Alzheimer disease. *Arch Neurol* 57: 236-40 (2000).
- 32 [27] Brandi ML, Becherini L, Gennari L, Racchi M, Bianchetti A, Nacmias B, et al.  
33 Association of the estrogen receptor alpha gene polymorphisms with sporadic  
34 Alzheimer's disease. *Biochem Biophys Res Commun* 265: 335-8 (1999).
- 35 [28] Isoe-Wada K, Maeda M, Yong J, Adachi Y, Harada H, Urakami K, et al.  
36 Positive association between an estrogen receptor gene polymorphism and Parkinson's  
37 disease with dementia. *Eur J Neurol* 6: 431-5 (1999).
- 38 [29] Mattila KM, Axelman K, Rinne JO, Blomberg M, Lehtimaki T, Laippala P, et  
39 al. Interaction between estrogen receptor 1 and the epsilon4 allele of apolipoprotein E  
40 increases the risk of familial Alzheimer's disease in women. *Neurosci Lett* 282: 45-8  
41 (2000).
- 42 [30] Pavao M, Traish AM. Estrogen receptor antibodies: specificity and utility in  
43 detection, localization and analyses of estrogen receptor alpha and beta. *Steroids* 66: 1-  
44 16 (2001).
- 45 [31] Weickert CS, Miranda-Angulo AL, Wong J, Perlman WR, Ward SE,  
46 Radhakrishna V, et al. Variants in the estrogen receptor alpha gene and its mRNA  
47 contribute to risk for schizophrenia. *Hum Mol Genet* 17: 2293-309 (2008).
- 48 [32] Pirskanen M, Hiltunen M, Mannermaa A, Helisalmi S, Lehtovirta M, Hanninen  
49 T, et al. Estrogen receptor beta gene variants are associated with increased risk of  
50 Alzheimer's disease in women. *Eur J Hum Genet* 13: 1000-6 (2005).
- 51  
52  
53  
54  
55  
56  
57  
58  
59  
60



- 1  
2  
3 [33] Westberg L, Hakansson A, Melke J, Shahabi HN, Nilsson S, Buervenich S, et al.  
4 Association between the estrogen receptor beta gene and age of onset of Parkinson's  
5 disease. *Psychoneuroendocrinology* 29: 993-8 (2004).
- 6 [34] Dresner-Pollak R, Kinnar T, Friedlander Y, Sharon N, Rosenmann H, Pollak A.  
7 Estrogen receptor beta gene variant is associated with vascular dementia in elderly  
8 women. *Genet Test Mol Biomarkers* 13: 339-42 (2009).
- 9 [35] Petersen RC. Mild cognitive impairment clinical trials. *Nat Rev Drug Discov* 2:  
10 646-53 (2003).
- 11 [36] Corbo RM, Gambina G, Ruggeri M, Scacchi R. Association of estrogen receptor  
12 alpha (ESR1) PvuII and XbaI polymorphisms with sporadic Alzheimer's disease and  
13 their effect on apolipoprotein E concentrations. *Dement Geriatr Cogn Disord* 22: 67-72  
14 (2006).
- 15 [37] Monastero R, Cefalu AB, Camarda C, Noto D, Camarda LK, Caldarella R, et al.  
16 Association of estrogen receptor alpha gene with Alzheimer's disease: a case-control  
17 study. *J Alzheimers Dis* 9: 273-8 (2006).
- 18 [38] Porrello E, Monti MC, Sinforiani E, Cairati M, Guaita A, Montomoli C, et al.  
19 Estrogen receptor alpha and APOEepsilon4 polymorphisms interact to increase risk for  
20 sporadic AD in Italian females. *Eur J Neurol* 13: 639-44 (2006).
- 21 [39] den Heijer T, Schuit SC, Pols HA, van Meurs JB, Hofman A, Koudstaal PJ, et  
22 al. Variations in estrogen receptor alpha gene and risk of dementia, and brain volumes  
23 on MRI. *Mol Psychiatry* 9: 1129-35 (2004).
- 24 [40] Lambert JC, Harris JM, Mann D, Lemmon H, Coates J, Cumming A, et al. Are  
25 the estrogen receptors involved in Alzheimer's disease? *Neurosci Lett* 306: 193-7  
26 (2001).
- 27 [41] Prince JA, Feuk L, Sawyer SL, Gottfries J, Ricksten A, Nagga K, et al. Lack of  
28 replication of association findings in complex disease: an analysis of 15 polymorphisms  
29 in prior candidate genes for sporadic Alzheimer's disease. *Eur J Hum Genet* 9: 437-44  
30 (2001).
- 31 [42] Usui C, Shibata N, Ohnuma T, Higashi S, Ohkubo T, Ueki A, et al. No genetic  
32 association between the myeloperoxidase gene -463 polymorphism and estrogen  
33 receptor-alpha gene polymorphisms and Japanese sporadic Alzheimer's disease. *Dement  
34 Geriatr Cogn Disord* 21: 296-9 (2006).
- 35 [43] Luckhaus C, Sand PG. Estrogen Receptor 1 gene (ESR1) variants in Alzheimer's  
36 disease. Results of a meta-analysis. *Aging Clin Exp Res* 19: 165-8 (2007).
- 37 [44] Rodriguez E, Mateo I, Llorca J, Sanchez-Quintana C, Infante J, Berciano J, et al.  
38 No association between low density lipoprotein receptor genetic variants and  
39 Alzheimer's disease risk. *Am J Med Genet B Neuropsychiatr Genet* 141B: 541-3  
40 (2006).
- 41 [45] Boada M, Antunez C, Lopez-Arrieta J, Caruz A, Moreno-Rey C, Ramirez-Lorca  
42 R, et al. Estrogen receptor alpha gene variants are associated with Alzheimer's disease.  
43 *Neurobiol Aging*:  
44
- 45 [46] Ji Y, Urakami K, Wada-Isoe K, Adachi Y, Nakashima K. Estrogen receptor gene  
46 polymorphisms in patients with Alzheimer's disease, vascular dementia and alcohol-  
47 associated dementia. *Dement Geriatr Cogn Disord* 11: 119-22 (2000).
- 48 [47] Lin GF, Ma QW, Zhang DS, Zha YL, Lou KJ, Shen JH. Polymorphism of alpha-  
49 estrogen receptor and aryl hydrocarbon receptor genes in dementia patients in Shanghai  
50 suburb. *Acta Pharmacol Sin* 24: 651-6 (2003).
- 51 [48] Long JR, Xu H, Zhao LJ, Liu PY, Shen H, Liu YJ, et al. The oestrogen receptor  
52 alpha gene is linked and/or associated with age of menarche in different ethnic groups. *J  
53 Med Genet* 42: 796-800 (2005).
- 54  
55  
56  
57  
58  
59  
60

- 1  
2  
3 [49] Forsell C, Enmark E, Axelman K, Blomberg M, Wahlund LO, Gustafsson JA, et  
4 al. Investigations of a CA repeat in the oestrogen receptor beta gene in patients with  
5 Alzheimer's disease. *Eur J Hum Genet* 9: 802-4 (2001).
- 6 [50] Goumidi L, Dahlman-Wright K, Tapiá-Paez I, Matsson H, Pasquier F, Amouyel  
7 P, et al. Study of estrogen receptor-alpha and receptor-beta gene polymorphisms on  
8 Alzheimer's disease. *J Alzheimers Dis* 26: 431-9
- 9 [51] Ishunina TA, van Heerikhuizen JJ, Ravid R, Swaab DF. Estrogen receptors and  
10 metabolic activity in the human tuberomammillary nucleus: changes in relation to sex,  
11 aging and Alzheimer's disease. *Brain Res* 988: 84-96 (2003).
- 12 [52] Birge SJ. The role of estrogen in the treatment of Alzheimer's disease.  
13 *Neurology* 48: S36-41 (1997).
- 14 [53] Stone DJ, Rozovsky I, Morgan TE, Anderson CP, Finch CE. Increased synaptic  
15 sprouting in response to estrogen via an apolipoprotein E-dependent mechanism:  
16 implications for Alzheimer's disease. *J Neurosci* 18: 3180-5 (1998).
- 17 [54] Toran-Allerand CD, Miranda RC, Bentham WD, Sohrabji F, Brown TJ,  
18 Hochberg RB, et al. Estrogen receptors colocalize with low-affinity nerve growth factor  
19 receptors in cholinergic neurons of the basal forebrain. *Proc Natl Acad Sci U S A* 89:  
20 4668-72 (1992).
- 21 [55] Gandy S. Estrogen and neurodegeneration. *Neurochem Res* 28: 1003-8 (2003).
- 22  
23  
24  
25  
26  
27  
28  
29  
30  
31  
32  
33  
34  
35  
36  
37  
38  
39  
40  
41  
42  
43  
44  
45  
46  
47  
48  
49  
50  
51  
52  
53  
54  
55  
56  
57  
58  
59  
60

STROBE Statement—Checklist of items that should be included in reports of *case-control studies*

|                              | Item No | Recommendation                                                                                                                                                                                        |
|------------------------------|---------|-------------------------------------------------------------------------------------------------------------------------------------------------------------------------------------------------------|
| Title and abstract           | 1       | (a) Indicate the study's design with a commonly used term in the title or the abstract<br><i>Page 2</i>                                                                                               |
|                              |         | (a) Provide in the abstract an informative and balanced summary of what was done and what was found<br><i>Page 2</i>                                                                                  |
| <b>Introduction</b>          |         |                                                                                                                                                                                                       |
| Background/rationale         | 2       | Explain the scientific background and rationale for the investigation being reported<br><i>Page 3</i>                                                                                                 |
| Objectives                   | 3       | State specific objectives, including any prespecified hypotheses<br><i>Page 4</i>                                                                                                                     |
| <b>Methods</b>               |         |                                                                                                                                                                                                       |
| Study design                 | 4       | Present key elements of study design early in the paper<br><i>Page 4</i>                                                                                                                              |
| Setting                      | 5       | Describe the setting, locations, and relevant dates, including periods of recruitment, exposure, follow-up, and data collection<br><i>Page 4-5</i>                                                    |
| Participants                 | 6       | (a) Give the eligibility criteria, and the sources and methods of case ascertainment and control selection. Give the rationale for the choice of cases and controls<br><i>Page 4-5</i>                |
|                              |         | (b) For matched studies, give matching criteria and the number of controls per case                                                                                                                   |
| Variables                    | 7       | Clearly define all outcomes, exposures, predictors, potential confounders, and effect modifiers. Give diagnostic criteria, if applicable<br><i>Page 4-6</i>                                           |
| Data sources/<br>measurement | 8*      | For each variable of interest, give sources of data and details of methods of assessment (measurement). Describe comparability of assessment methods if there is more than one group<br><i>Page 4</i> |
| Bias                         | 9       | Describe any efforts to address potential sources of bias<br><i>Page 6</i>                                                                                                                            |
| Study size                   | 10      | Explain how the study size was arrived at                                                                                                                                                             |
| Quantitative variables       | 11      | Explain how quantitative variables were handled in the analyses. If applicable, describe which groupings were chosen and why                                                                          |
| Statistical methods          | 12      | (a) Describe all statistical methods, including those used to control for confounding<br><i>Page 5-6</i>                                                                                              |
|                              |         | (b) Describe any methods used to examine subgroups and interactions                                                                                                                                   |
|                              |         | (c) Explain how missing data were addressed                                                                                                                                                           |
|                              |         | (d) If applicable, explain how matching of cases and controls was addressed                                                                                                                           |

(e) Describe any sensitivity analyses

---

**Results**

---

Participants 13\* (a) Report numbers of individuals at each stage of study—eg numbers potentially eligible, examined for eligibility, confirmed eligible, included in the study, completing follow-up, and analysed

Page 4-5

---

(b) Give reasons for non-participation at each stage

---

(c) Consider use of a flow diagram

---

Descriptive data 14\* (a) Give characteristics of study participants (eg demographic, clinical, social) and information on exposures and potential confounders

Page 4-6

---

(b) Indicate number of participants with missing data for each variable of interest

Page 4

---

Outcome data 15\* Report numbers in each exposure category, or summary measures of exposure

Page 6-9

---

Main results 16 (a) Give unadjusted estimates and, if applicable, confounder-adjusted estimates and their precision (eg, 95% confidence interval). Make clear which confounders were adjusted for and why they were included

Page 9-10

---

(b) Report category boundaries when continuous variables were categorized

---

(c) If relevant, consider translating estimates of relative risk into absolute risk for a meaningful time period

---

1  
2  
3  
4  
5  
6  
7  
8  
9  
10  
11  
12  
13  
14  
15  
16  
17  
18  
19  
20  
21  
22  
23  
24  
25  
26  
27  
28  
29  
30  
31  
32  
33  
34  
35  
36  
37  
38  
39  
40  
41  
42  
43  
44  
45  
46  
47  
48  
49  
50  
51  
52  
53  
54  
55  
56  
57  
58  
59  
60

---

Other analyses 17 Report other analyses done—eg analyses of subgroups and interactions, and sensitivity analyses

---

### Discussion

Key results 18 Summarise key results with reference to study objectives

Page 11

Limitations 19 Discuss limitations of the study, taking into account sources of potential bias or imprecision.  
Discuss both direction and magnitude of any potential bias

Page 12

Interpretation 20 Give a cautious overall interpretation of results considering objectives, limitations, multiplicity  
of analyses, results from similar studies, and other relevant evidence

Page 11-12

Generalisability 21 Discuss the generalisability (external validity) of the study results

Page 12 (multicenter nature)

### Other information

Funding 22 Give the source of funding and the role of the funders for the present study and, if applicable,  
for the original study on which the present article is based

Page 13

\*Give information separately for cases and controls.

**Note:** An Explanation and Elaboration article discusses each checklist item and gives methodological background and published examples of transparent reporting. The STROBE checklist is best used in conjunction with this article (freely available on the Web sites of PLoS Medicine at <http://www.plosmedicine.org/>, Annals of Internal Medicine at <http://www.annals.org/>, and Epidemiology at <http://www.epidem.com/>). Information on the STROBE Initiative is available at <http://www.strobe-statement.org>.



**Estrogen receptor polymorphisms are an associated risk factor for mild cognitive impairment and Alzheimer disease in women APOE ε4 carriers**

|                                 |                                                                                                                                                                                                                                                                                                                                                                                                                                                                                                                                                                                                                                                                                                                                                                                                                                                                                                                                                                                                                                                            |
|---------------------------------|------------------------------------------------------------------------------------------------------------------------------------------------------------------------------------------------------------------------------------------------------------------------------------------------------------------------------------------------------------------------------------------------------------------------------------------------------------------------------------------------------------------------------------------------------------------------------------------------------------------------------------------------------------------------------------------------------------------------------------------------------------------------------------------------------------------------------------------------------------------------------------------------------------------------------------------------------------------------------------------------------------------------------------------------------------|
| Journal:                        | <i>BMJ Open</i>                                                                                                                                                                                                                                                                                                                                                                                                                                                                                                                                                                                                                                                                                                                                                                                                                                                                                                                                                                                                                                            |
| Manuscript ID:                  | bmjopen-2013-003200.R1                                                                                                                                                                                                                                                                                                                                                                                                                                                                                                                                                                                                                                                                                                                                                                                                                                                                                                                                                                                                                                     |
| Article Type:                   | Research                                                                                                                                                                                                                                                                                                                                                                                                                                                                                                                                                                                                                                                                                                                                                                                                                                                                                                                                                                                                                                                   |
| Date Submitted by the Author:   | 30-Jul-2013                                                                                                                                                                                                                                                                                                                                                                                                                                                                                                                                                                                                                                                                                                                                                                                                                                                                                                                                                                                                                                                |
| Complete List of Authors:       | Fernández-Martínez, Manuel; Hospital Universitario Cruces, Neurology Elcoroaristizabal, Xabier; University of Basque Country UPV/EHU, Blanco, Elisa; Hospital Universitario Cruces, Neurology Galdós, Luis; Hospital Universitario Txagorritxu,, Neurology Ugarriza-Serrano, Iratxe; Hospital Universitario Cruces, Neurology Gómez-Busto, Fernando; Vitoria-Gasteiz city Council, San Prudencio Comprehensive Care Center for elderly Álvarez-Álvarez, Maite; University of Basque Country UPV/EHU, Molano, Ana; Hospital Universitario Cruces, Neurology Bereincua, Rocío; Hospital Universitario Cruces, Neurology Inglés, Sandra; Hospital Universitario Txagorritxu, Neurology Uterga, Juan; Hospital Universitario Basurto, Neurology Indakoetxea, Begoña; Hospital Universitario Donostia, Neurology Gómez-Beldarraín, María; Hospital Galdakao, Neurology Moraza, Josefa; Hospital Santiago Apóstol, Neurology Barandiarán, Myriam; Hospital Universitario Donostia, Neurology Martínez-De Pancorbo, Marian; University of Basque Country UPV/EHU, |
| <b>Primary Subject Heading</b>: | Neurology                                                                                                                                                                                                                                                                                                                                                                                                                                                                                                                                                                                                                                                                                                                                                                                                                                                                                                                                                                                                                                                  |
| Secondary Subject Heading:      | Geriatric medicine, Genetics and genomics                                                                                                                                                                                                                                                                                                                                                                                                                                                                                                                                                                                                                                                                                                                                                                                                                                                                                                                                                                                                                  |
| Keywords:                       | Dementia < NEUROLOGY, Adult neurology < NEUROLOGY, GENETICS                                                                                                                                                                                                                                                                                                                                                                                                                                                                                                                                                                                                                                                                                                                                                                                                                                                                                                                                                                                                |
|                                 |                                                                                                                                                                                                                                                                                                                                                                                                                                                                                                                                                                                                                                                                                                                                                                                                                                                                                                                                                                                                                                                            |

SCHOLARONE™  
Manuscripts

## Estrogen receptor polymorphisms are an associated risk factor for mild cognitive impairment and Alzheimer disease in women APOE ε4 carriers

Manuel Fernández-Martínez<sup>1\*</sup>, Xabier Elcoroaristizabal Martín<sup>2\*</sup>, Elisa Blanco Martín<sup>1</sup>, Luis Galdos Alcelay<sup>3</sup>, Iratxe Ugarriza Serrano<sup>1</sup>, Fernando Gómez Busto<sup>4</sup>, Maite Álvarez-Álvarez<sup>2</sup>, Ana Molano Salazar<sup>1</sup>, Rocio Bereincua Gandarias<sup>1</sup>, Sandra Inglés Borda<sup>3</sup>, Juan María Uterga Valiente<sup>5</sup>, Begoña Indakoetxea Juanbeltz<sup>6</sup>, María Ángeles Gómez Beldarraín<sup>7</sup>, Josefa Moraza López<sup>8</sup>, Myriam Barandiarán Amillano<sup>6</sup>, Marian M. de Pancorbo<sup>2</sup>.

\*Equally Contributed.

<sup>§</sup>Corresponding author.

<sup>1</sup>Neurology Department. Hospital Universitario Cruces. BioCruces Health Research Institute (Barakaldo-Vizcaya). Spain. <sup>2</sup>BIOMICS Research Group. Dpt. of Z. and Cellular Biology A. Centro de Investigación y Estudios Avanzados Lucio Lascaray (CIEA). University of Basque Country UPV/EHU (Vitoria-Gasteiz). Spain. <sup>3</sup>Neurology Department. Hospital Universitario Txagorritxu. (Vitoria-Gasteiz). Spain. <sup>4</sup>San Prudencio Comprehensive Care Center for elderly. Vitoria-Gasteiz city Council. Basque Country. Spain. <sup>5</sup>Neurology Department. Hospital Universitario Basurto. (Bilbao-Vizcaya)Spain. <sup>6</sup>Neurology Department. Hospital Universitario Donostia. (Donostia-Guipuzcoa). <sup>7</sup>Neurology Department. Hospital de Galdakao (Galdakao -Vizcaya) <sup>8</sup>Neurology Department. Hospital Santiago Apóstol. (Vitoria-Gasteiz) Spain.

<sup>§</sup> Manuel Fernández Martínez - [mfernandezm@oroitu.com](mailto:mfernandezm@oroitu.com)  
Xabier Elcoroaristizabal Martín - [xabierelcoro@gmail.com](mailto:xabierelcoro@gmail.com)  
Elisa Blanco Martín - [elibliam@gmail.com](mailto:elibliam@gmail.com)  
Luis Galdos Alcelay - [luis@lurra.jazztel.es](mailto:luis@lurra.jazztel.es)  
Iratxe Ugarriza Serrano - [IRATXE.UGARRIZASERRANO@osakidetza.net](mailto:IRATXE.UGARRIZASERRANO@osakidetza.net)  
Fernando Gómez Busto - [fgomezbusto@vitoria-gasteiz.org](mailto:fgomezbusto@vitoria-gasteiz.org)  
Maite Álvarez-Álvarez - [maite.alvarez@ehu.es](mailto:maite.alvarez@ehu.es)  
Ana Molano Salazar - [psimolano@yahoo.es](mailto:psimolano@yahoo.es)  
Rocio Bereincua Gandarias - [rocio.bgan@yahoo.es](mailto:rocio.bgan@yahoo.es)  
Sandra Inglés Borda - [sibcat02@yahoo.es](mailto:sibcat02@yahoo.es)  
Juan María Uterga Valiente - [JUANMARIA.UTERGAVALIENTE@osakidetza.net](mailto:JUANMARIA.UTERGAVALIENTE@osakidetza.net)  
Begoña Indakoetxea Juanbeltz - [bindakoetxeaj@meditex.es](mailto:bindakoetxeaj@meditex.es)  
María Ángeles Gómez Beldarraín - [mariaangeles.gomezbeldarrain@osakidetza.net](mailto:mariaangeles.gomezbeldarrain@osakidetza.net)  
Josefa Moraza López - [m.j.moraza@gmail.com](mailto:m.j.moraza@gmail.com)  
Myriam Barandiarán Amillano - [MYRIAM.BARANDIARANAMILLANO@osakidetza.net](mailto:MYRIAM.BARANDIARANAMILLANO@osakidetza.net)  
Marian M. de Pancorbo - [marianpancorbo@gmail.com](mailto:marianpancorbo@gmail.com)

## ABSTRACT

**Objectives:** Examine the role of single nucleotide polymorphisms (SNPs) in the estrogen receptor genes: rs9340799, rs2234693, rs2228480 (in the *ESR1* gene) and rs4986938 (in the *ESR2* gene) as a risk factor for amnesic mild cognitive impairment (MCIa) and Alzheimer's disease (AD) and its possible association with *APOE* gene

**Design:** We have investigated the independent and combined association of different alleles of the estrogen receptor genes and *APOE*\* $\epsilon$ 4 allele with cognitive impairment using a case-control design.

**Setting:** Subjects were prospectively recruited from Neurology Departments of several Basque Country hospitals.

**Participants:** This study comprised 816 Caucasian subjects that were aged 50 years and older: 204 MCIa, 350 sporadic AD patients and 262 healthy controls,

**Primary and secondary outcome measures:** Clinical criteria and neuropsychological tests were used to establish the diagnostic groups (MCIa, AD and healthy controls). A dichotomous variable was used for each allele and genotype and the association with MCI and AD was established using Logistic Regression Models.

**Results:** Neither alleles nor genotypes of SNPs rs9340799, rs2234693, rs2228480 and rs4986938 of estrogen receptor genes (*ESR1* and *ESR2*) are independently associated with the risk of MCIa or AD. However, the genetic profile created with the combination of the less represented alleles of these SNPs (expressed as XPAA) was associated with an increased risk for MCIa (OR= 3.30, 95%CI 1.28-8.54,  $p=0.014$ ) and AD (OR= 5.16, 95% CI 2.19-12.14,  $p<0.001$ ) in women *APOE*\* $\epsilon$ 4 allele carriers.

**Conclusions:** The less represented alleles of SNPs studied are associated with MCIa and AD in *APOE*\* $\epsilon$ 4 carriers. Particularly, the genetic profile created with the less represented alleles of *ESR1* and *ESR2* SNPs are associated with an increased risk for MCIa and AD in women *APOE* $\epsilon$ 4 allele carriers.

## ARTICLE SUMMARY

### Article focus:

- Alzheimer's disease's etiology is complex and multifactorial
- Estrogen receptors have several polymorphisms that seem to be related to the effect of the main risk factor to Alzheimer disease (AD), the *APOE* gene.
- The aim of the study is to examine the role of the single nucleotide polymorphisms (SNPs): rs9340799, rs2234693, rs2228480 and rs4986938 as a risk factor for mild cognitive impairment (MCI) and AD and its possible association with *APOE* gene

### Key message

- *APOE*\* $\epsilon$ 4 allele is an independent risk factor for the AD population, and this risk is higher in women



- rs9340799, rs2234693, rs2228480 and rs4986938 are not independently associated with the risk of MCI and AD
- The less represented alleles of SNPs studied are associated with MCI and AD in APOE\*E4 carriers

#### Strengths and limitations of this study

- It was one of the first studies to investigate an association between polymorphisms of ER genes and cognitive function not only in AD patients, but also in MCI.
- It is a multicenter study with a patient sample that allows gender stratification.
- The study population comes from the hospital setting. A community-based study could provide more information.
- The levels of estradiol and the previous estrogen replacement therapy were unknown.

#### INTRODUCTION:

Alzheimer's disease (AD) is the most common form of dementia, currently affecting over 9 million americans and europeans, its etiology is complex and multifactorial. Several genes associated with sporadic and familial AD have been identified, but it is estimated that probably more than 50% of genetic risk remains unidentified<sup>1</sup>.

The apolipoprotein E gene (*APOE*) is a genetic factor closely related to late onset AD disease, and constitutes a strong independent risk factor for sporadic AD<sup>2</sup>. However, the *APOE* gene explains only a fraction of the genetic risk associated with AD, and it is possible that other genes or metabolic factors may modify the *APOE* effect to initiate the pathogenesis of AD.

In the last years genetic research has focused on identifying common population polymorphism loci, not only *APOE*, but also other genes such as *CLU*, *CR1*, *PICALM* and *EXOC3L2* have been associated with an increased risk for developing AD<sup>3-6</sup>. These genes are implicated in chaperone action, positive regulation immune response, regulation of receptor-mediated endocytosis. Strikingly, although these genes have a significant effect on the risk of AD, risks differ by more than two orders of magnitude lower than *APOE*.

Estrogens are pleiotropic hormones having an influence not only on reproductive system but also in central nervous system (CNS). These hormones are synthesized by ovaries and are also produced in smaller amounts by other tissues such as glia in CNS, having a wide spectrum of effects such as neuroprotective and antiapoptotic<sup>7-9</sup>. Synaptogenic effects of estradiol-17-Beta have been demonstrated in the adult mammalian brain (rodent and monkey models), low levels of estradiol are correlated with lower synapse density, while high estradiol levels are correlated with a higher density of synapses in the hippocampal region and dendritic spine density in CA1 pyramidal cells<sup>10,11</sup>. Among other positive effects of estrogens<sup>12</sup>, estradiol-17-Beta has an effect on 1) the maintenance and increase of the neurotransmitter systems, 2) the *APP* processing, Abeta levels and factors that alter its clearance and aggregation<sup>13</sup>, 3) mechanisms of oxidative damage. Multiple lines of evidence suggest that loss of estrogens in the aging brain of both women and men may play a role in the cognitive declines associated with AD<sup>14</sup> but whether female sex is also a risk factor is controversial although some past and a recent study show higher rates of cognitive decline for women and apolipoprotein E4 carriers (*APOE*\*ε4)<sup>15,16</sup>, and mouse AD-transgenic mice studies generally show great amyloid and neurodegeneration in females

1  
2  
3<sup>17 18</sup>. However, despite the initial data<sup>19-22</sup>, there is disagreement regarding hormonal replacement  
4 therapy in women<sup>14 23-25</sup>.

5  
6 Furthermore, it has also described an interaction With ApoE. Estradiol increased ApoE levels and neurite  
7 outgrowth. APOE\*ε2 isoform increased neurite length more than APOE\*ε3 isoform in the presence of  
8 estradiol-17-Beta. The hormone had no effect on neurite outgrowth from mice lacking the *APOE* gene  
9 or when only APOE\*ε4, the isoform that is associated with increased risk of neurological disease, was  
10 exogenously supplied<sup>26</sup>. These data support the hypothesis that *APOE* gene plays an integral role in the  
11 neurotrophic effects of estradiol-17-Beta, and the presence of a probable synergism between ApoE  
12 subtype expression and the effects of estrogens.

13  
14 The mechanism through estrogens exert its neuroprotective and anti-neurodegenerative effects in the  
15 CNS is poorly understood overall are mediated by two estrogen receptors (ERs), ERalpha and ERbeta  
16 (coded by *ESR1* and *ESR2* gene), expressed in neurons and glia throughout the brain, especially in  
17 hippocampus and amygdale<sup>27 28</sup>, regions involved in memory and learning process. Thus, genetic  
18 variants in ER genes have been studied in relation to AD. There are several polymorphic loci in intron 1  
19 of *ESR1* gen, highlighting the PvuII and XbaI locus<sup>29</sup>. The polymorphisms of PvuII were coded as P or p  
20 and the polymorphisms of XbaI as X or x, in which the capital letter signifies the absence of the  
21 restriction site and the lower case letter, signifies its presence. Subjects were described as pp or xx  
22 homozygotes, Pp or Xx heterozygotes, or PP or XX homozygotes<sup>30</sup>. The xp haplotype has higher  
23 expression than the XP one, but with no significant differences<sup>31</sup>. Several studies,<sup>32-34</sup> but not all<sup>31</sup> have  
24 found an increased frequency of the PvuII and XbaI *ESR1* polymorphisms in AD patients.

25  
26 Other interesting SNP is rs2228480, this polymorphism is the coding synonymous variant at codon 594  
27 (rs2228480) within the last exon of the gene *ESR1* gen. This variant is thought to play a role in  
28 distinguishing between the receptor agonist or antagonists binding to the receptor molecule<sup>35</sup>. In  
29 addition, this SNP has been associated with schizophrenia and the mechanism of this association may  
30 involve alternative gene regulation and transcript processing<sup>36</sup>.

31  
32 Other studies have shown an association between several polymorphism of *ESR2* gene and late onset  
33 AD, and they found that variations in this gene could modify disease susceptibility<sup>37</sup>. The polymorphism  
34 located in 3'UTR of *ESR2* gene, rs4986938, has been associated with the onset of Parkinson disease<sup>38</sup>  
35 and the susceptibility for vascular dementia (VaD) in an Israeli cohort, but not with AD<sup>39</sup>. In the study of  
36 Dresener-Pollack et al. (2009), VaD is differentiated from AD by clinical criteria, but in the absence of  
37 imaging data, the potential misclassification is high. Thus, results should be confirmed.

38  
39 To date no studies have been conducted in the prodromal stages of AD such as mild cognitive  
40 impairment of amnesic type (MCIa). Such studies could provide information about the beginning of the  
41 disease process, helping to ensure that suitable therapeutic measures would be implemented at an early  
42 stage.

43  
44 According to the above, the aim of the present study was to determine whether the *ESR1* and *ESR2*  
45 genes are linked to the risk of MCIa; whether there is an interaction with *APOE* gene; and whether such  
46 interaction could influence the risk of AD and MCIa. Our hypothesis is that the association of the *ESR1*  
47 and *ESR2* genes with cognitive impairment may exist only in APOE\*ε4 carriers. We have studied this  
48 association in AD patients and in MCIa patients, the latter condition possibly representing a prodrome  
49 for AD type dementia.<sup>40</sup>

50  
51 With the purpose of examining the association of the *ESR1* and *ESR2* genes involved in estrogen  
52 metabolism, as a genetic risk factor for cognitive impairment, we conducted a study on a sample of  
53 patients with MCIa, AD and a control group. All subjects were analysed for the *ESR1* (rs9340799,  
54 rs2234693 and rs2228480) and *ESR2* (rs4986938) polymorphisms and *APOE* genotype.

## METHODS:

This study comprised 816 caucasian subjects, included in 3 groups: MCIa patients (n=204), AD patients (n=350) and healthy controls (CTL) (n=262). Subjects were prospectively recruited from Neurology Departments of several hospitals. Participants were aged 50 years and older. For AD and MCIa patients, evaluation also included routine blood tests: haematology, biochemistry, thyroid-stimulating hormone, vitamin B12 levels, syphilis serology and neuroimaging test: CT (Computerized Tomography) scan or MRI (Magnetic Resonance Imaging).

The subjects were evaluated using a broad battery of neuropsychological tests: Minimal State Examination (MMSE), Clinical Dementia Rating scale, CERAD protocol, Stroop test, unilateral and bilateral motor praxis, 7-minute test, trial making part A and B; and Neuropsychiatric Inventory (NPI).

Based upon the results of these evaluations, the participants were classified into the following groups: MCIa patients, AD patients and healthy control subjects.

The diagnosis of MCIa patients was based on Petersen's criteria<sup>40</sup>. Patients had memory complaints corroborated by an informant, representing a decline from a previous level of functioning given their age and educational level. The score in CDR scale was required to be 0.5, and performance in relation to other cognitive functions and daily living activities were required to be normal. The diagnosis of AD was based on the DSM IV and NINCDS-ADRDA criteria for probable and possible AD. Patients with a total score of less than 3 on CDR scale (mild to moderate dementia) were included.

Healthy control subjects scored within the normal ranges for age and educational level in psychometric testing, with a CDR score of 0.

The exclusion criteria included: severe comorbidities making adequate follow-up unlikely, acute psychiatric diseases, previous cerebrovascular diseases (transient ischemic attacks, stroke or intracranial haemorrhage), other neurodegenerative diseases, and the absence of a reliable informant.

A specific database was designed and declared to the Spanish Data Protection Agency. The study was approved by the Ethics Committee of Cruces Hospital (Barakaldo, Spain). All patients signed informed consent to undergo the examination. The study was conducted in accordance with the Declaration of Helsinki concerning medical research in human subjects.

### Genetic analysis:

On the first visit, peripheral blood samples were collected in EDTA vacuum tubes from all individuals. Genomic DNA was extracted by proteolytic lysis from white blood cells using standard phenol/chloroform extraction method.

*APOE* gene was amplified by PCR with 112F and 158R primers, under the PCR conditions described by Wilton and Lim<sup>41</sup>. Digestion of the amplified product was carried out with Hae II and Afl III, as described by Álvarez-Álvarez et al. (2003)<sup>42</sup>.

Three single nucleotide polymorphisms (SNPs) in the *ESR1* gene (rs9340799, rs2234693 and rs2228480) and one SNP in the *ESR2* gene (rs4986938) were evaluated. First two SNPs in *ESR1* (rs9340799 and rs2234693) are in intron 1 and are separated by only 46 base pairs. The rs9340799 polymorphism marks an A→G transition 351 nucleotides upstream in intron 1 (also known as c.454-351A>G). Those with the G allele have an absent XbaI site which has previously been called X in the literature, with the A allele denoted by x. The rs2234693 polymorphism is characterized by a T→C transition 397 nucleotides upstream in the intron (also known as c.454-497T>C) that obliterates the PvuII restriction site. The T allele has previously been called the p allele, while the C allele has been called the P allele, denoting the absence of the PvuII restriction site. Subjects were described as XX, xx, PP, pp, homozygotes; and Xx or Pp heterozygotes.

Taqman SNP Genotyping Assays were used to analyse polymorphism rs2228480; G>A (SNP1) of *ESR1* gen and polymorphism rs4986938; G>A (SNP2) of *ESR2* gen.

SNP genotypes of candidate genes (*ESR1* and *ESR2*) and *APOE* gene were analysed blinded to clinical diagnosis.

The less frequent alleles of each SNP were evaluated such as a combined genotype (XPAA). Therefore with the name of XPAA we are referring all haplotypes with at least one X allele (rs9340799), one P allele (rs2234693), one A allele (rs2228480) and one A allele (rs4986938).

### Statistical analyses

Genepop version 4.0 was used to test the goodness of the fit to the Hardy-Weinberg equilibrium by means of the Guo-Thompson exact test for all three groups studied<sup>43</sup>. The G test was also used to check the differences between demographic and clinical variables, allele frequencies and genotype frequencies.

Statistical analysis was also performed using the SPSS<sup>®</sup> package, version 15.0. A dichotomous variable was used for each polymorphism: "yes" or "no" for "carrier" or "non carrier" of the *APOE*\* $\epsilon$ 4 allele and for different alleles and genotypes of the SNPs in candidate genes (*ESR1* and *ESR2* genes).

Several multinomial regression models were created in order to determine the independent effect of X, P and SNP1-A alleles of *ESR1* gen and SNP2-A allele of *ESR2* gen in the total sample and in the absence of *APOE*\* $\epsilon$ 4 allele. The effect of *APOE*\* $\epsilon$ 4 allele in the total sample and in the different diagnostic groups was also calculated. Another model was created to assess the combined effect of different polymorphism of *ESR1* and *ESR2* genes and the *APOE*\* $\epsilon$ 4 allele, based on the hypothesis that the effect of estrogens might exist only in *APOE*\* $\epsilon$ 4 allele carriers.

Because age and gender could be associated with the frequency of some polymorphisms, we adjusted our analysis for these covariates in total sample. P-values of less than 0.05 were considered statistically significant.

## RESULTS:

We have investigated the independent and combined association of X, P and SNP1-A alleles of *ESR1* gen and SNP2-A allele of *ESR2* gen and *APOE*\* $\epsilon$ 4 allele by using a case-control design.

In the present study we analysed a sample of 204 MCIa patients, 350 AD patients, and 262 healthy control subjects without significant differences in terms of age ( $p > 0.05$ ). There was, however, a significant difference in the MMSE score between groups ( $p < 0.05$ ), (Table 1). Years of education were not significantly different between groups ( $p = 0.148$ ).

**Table 1.** Baseline Demographic

| Group    | n   | Age <sup>a</sup> | Women (%) <sup>b</sup> | MMSE <sup>c</sup> | Education <sup>d</sup> |
|----------|-----|------------------|------------------------|-------------------|------------------------|
| MCIa     | 204 | 70,25 ± 8,6      | 61,3                   | 26.38 ± 2.05      | 8,08 ± 4,36            |
| AD       | 350 | 72,17 ± 8,3      | 71,1                   | 19.68 ± 4.60      | 8,41 ± 7,90            |
| CONTROLS | 262 | 74,00 ± 9,6      | 59,5                   | 28.45 ± 1.63      | 9,51 ± 4,80            |

<sup>a</sup> Years, mean ± Standard Deviation (S.D.). <sup>b</sup> % of Women in group. <sup>c</sup> MMSE score, mean ± S.D. <sup>d</sup> Years of education

Table 2 shows the allele and genotype frequencies of *ESR1* and *ESR2* polymorphisms and *APOE* gene in MCIa, AD and controls. In all studied groups, frequencies were in Hardy-Weinberg equilibrium ( $p>0.05$ ).

**Table 2.** Allelic and genotypic frequency.

| <i>ESR1</i>      |         |                |             |                    |
|------------------|---------|----------------|-------------|--------------------|
|                  | XbaI    | MCIa (N = 204) | AD (N =350) | CONTROLS (N = 262) |
| Allele           | X       | 0.426          | 0.409       | 0.395              |
|                  | x       | 0.574          | 0.591       | 0.605              |
| Genotype         | XX      | 0.157          | 0.154       | 0.156              |
|                  | Xx      | 0.539          | 0.509       | 0.477              |
|                  | xx      | 0.304          | 0.337       | 0.366              |
| H-W <sup>a</sup> | p-Value | 0.197          | 0.376       | 1.000              |
|                  | PvuII   |                |             |                    |
| Allele           | P       | 0.488          | 0.480       | 0.462              |
|                  | p       | 0.512          | 0.520       | 0.538              |
| Genotype         | PP      | 0.225          | 0.209       | 0.214              |
|                  | Pp      | 0.525          | 0.543       | 0.496              |
|                  | pp      | 0.250          | 0.249       | 0.290              |
| H-W <sup>a</sup> | p-Value | 0.575          | 0.110       | 1.000              |
|                  | SNP1    |                |             |                    |
| Allele           | A       | 0.191          | 0.189       | 0.174              |
|                  | G       | 0.809          | 0.811       | 0.826              |
| Genotype         | AA      | 0.039          | 0.037       | 0.030              |
|                  | AG      | 0.304          | 0.303       | 0.286              |
|                  | GG      | 0.657          | 0.660       | 0.684              |
| H-W <sup>a</sup> | p-Value | 0.818          | 0.861       | 1.000              |
| <i>ESR2</i>      |         |                |             |                    |
|                  | SNP2    |                |             |                    |
| Allele           | A       | 0.424          | 0.419       | 0.378              |
|                  | G       | 0.576          | 0.581       | 0.622              |
| Genotype         | AA      | 0.201          | 0.189       | 0.133              |
|                  | AG      | 0.446          | 0.460       | 0.489              |
|                  | GG      | 0.353          | 0.351       | 0.378              |
| H-W <sup>a</sup> | p-Value | 0.245          | 0.325       | 0.591              |

| <i>APOE</i>            |                |       |       |       |
|------------------------|----------------|-------|-------|-------|
| <b>Allele</b>          | <b>2</b>       | 0.027 | 0.034 | 0.057 |
|                        | <b>3</b>       | 0.743 | 0.665 | 0.842 |
|                        | <b>4</b>       | 0.230 | 0.301 | 0.101 |
| <b>Genotype</b>        | <b>2,2</b>     | 0.000 | 0.000 | 0.008 |
|                        | <b>2,3</b>     | 0.044 | 0.046 | 0.092 |
|                        | <b>2,4</b>     | 0.010 | 0.017 | 0.008 |
|                        | <b>3,3</b>     | 0.574 | 0.434 | 0.698 |
|                        | <b>3,4</b>     | 0.294 | 0.420 | 0.195 |
|                        | <b>4,4</b>     | 0.078 | 0.083 | 0.000 |
| <b>H-W<sup>a</sup></b> | <b>p-Value</b> | 0.217 | 0.814 | 0.102 |
| <i>Genetic Profile</i> |                |       |       |       |
|                        | <b>XPAA(+)</b> | 0.709 | 0.708 | 0.674 |
|                        | <b>XPAA(-)</b> | 0.291 | 0.292 | 0.326 |

<sup>a</sup> Hardy-Weinberg probability test.

There were no significant differences in allele and genotype frequencies in MCIa and AD compared to controls for *ESR1* and *ESR2* gene polymorphisms, while the differences proved significant for *APOE* gene (Table 3).

**Table 3.** Exact G test

| <b>XbaI<sup>a</sup></b>  |                |                         | <b>XbaI<sup>b</sup></b>  |                |                         |
|--------------------------|----------------|-------------------------|--------------------------|----------------|-------------------------|
|                          | <b>P-value</b> | <b>S.E.<sup>c</sup></b> |                          | <b>P-value</b> | <b>S.E.<sup>c</sup></b> |
| <b>MCI vs CTL</b>        | 0.339          | 0.006                   | <b>MCI vs CTL</b>        | 0.336          | 0.004                   |
| <b>MCI vs AD</b>         | 0.571          | 0.005                   | <b>MCI vs AD</b>         | 0.564          | 0.004                   |
| <b>AD vs CTL</b>         | 0.638          | 0.005                   | <b>AD vs CTL</b>         | 0.635          | 0.004                   |
| <b>PvuII<sup>a</sup></b> |                |                         | <b>PvuII<sup>b</sup></b> |                |                         |
|                          | <b>P-value</b> | <b>S.E.<sup>c</sup></b> |                          | <b>P-value</b> | <b>S.E.<sup>c</sup></b> |
| <b>MCI vs CTL</b>        | 0.479          | 0.006                   | <b>MCI vs CTL</b>        | 0.464          | 0.004                   |

|                  |       |       |                  |       |       |
|------------------|-------|-------|------------------|-------|-------|
| <b>MCI vs AD</b> | 0.853 | 0.002 | <b>MCI vs AD</b> | 0.846 | 0.002 |
| <b>AD vs CTL</b> | 0.562 | 0.006 | <b>AD vs CTL</b> | 0.548 | 0.005 |

| <b>SNP1<sup>a</sup></b> |                |                         | <b>SNP1<sup>b</sup></b> |                |                         |
|-------------------------|----------------|-------------------------|-------------------------|----------------|-------------------------|
|                         | <b>P-value</b> | <b>S.E.<sup>c</sup></b> |                         | <b>P-value</b> | <b>S.E.<sup>c</sup></b> |
| <b>MCI vs CTL</b>       | 0.483          | 0.005                   | <b>MCI vs CTL</b>       | 0.491          | 0.004                   |
| <b>MCI vs AD</b>        | 0.935          | 0.002                   | <b>MCI vs AD</b>        | 0.935          | 0.001                   |
| <b>AD vs CTL</b>        | 0.532          | 0.011                   | <b>AD vs CTL</b>        | 0.552          | 0.007                   |

| <b>SNP2<sup>a</sup></b> |                |                         | <b>SNP2<sup>b</sup></b> |                |                         |
|-------------------------|----------------|-------------------------|-------------------------|----------------|-------------------------|
|                         | <b>P-value</b> | <b>S.E.<sup>c</sup></b> |                         | <b>P-value</b> | <b>S.E.<sup>c</sup></b> |
| <b>MCI vs CTL</b>       | 0.180          | 0.009                   | <b>MCI vs CTL</b>       | 0.153          | 0.005                   |
| <b>MCI vs AD</b>        | 0.896          | 0.003                   | <b>MCI vs AD</b>        | 0.904          | 0.003                   |
| <b>AD vs CTL</b>        | 0.139          | 0.007                   | <b>AD vs CTL</b>        | 0.173          | 0.009                   |

| <b>APOE<sup>a</sup></b> |                |                         | <b>APOE<sup>b</sup></b> |                |                         |
|-------------------------|----------------|-------------------------|-------------------------|----------------|-------------------------|
|                         | <b>P-value</b> | <b>S.E.<sup>c</sup></b> |                         | <b>P-value</b> | <b>S.E.<sup>c</sup></b> |
| <b>MCI vs CTL</b>       | 0.000          | <0.001                  | <b>MCI vs CTL</b>       | 0.000          | <0.001                  |
| <b>MCI vs AD</b>        | 0.033          | 0.002                   | <b>MCI vs AD</b>        | 0.033          | 0.002                   |
| <b>AD vs CTL</b>        | 0.000          | <0.001                  | <b>AD vs CTL</b>        | 0.000          | <0.001                  |

*a Allelic frequency. b Genotypic frequency. c Standard Error*

In order to determine whether the less represented alleles of SNPs in candidate genes (*ESR1* and *ESR2* genes) were an independent risk factor for MCIa and AD, we selected a subgroup of MCIa, AD and control individuals with the presence of at least one of these alleles. None of them had a significant effect (data not shown).

In the total sample, APOE\* $\epsilon$ 4 allele is a risk factor for cognitive impairment; the odds ratios (ORs) of developing MCIa and AD were 2.44 (95%CI 1.61-3.69,  $p < 0.001$ ) and 4.23 (95%CI 2.93-6.12,  $p < 0.001$ ), respectively (Table 4). The higher risk conferred by APOE\* $\epsilon$ 4 allele was observed even when the samples were subgrouped by sex, but in AD women the risk was higher than in men, 4.85 (95%CI 3.04-7.73,  $p < 0.001$ ) versus 3.19 (95%CI 1.73-5.88,  $p < 0.001$ ).

**Table 4.** Risk Factors for MCI and AD from Logistic Regression Models

| <b>Global Effects</b> | <b>MCI</b>       |          | <b>AD</b>        |          |
|-----------------------|------------------|----------|------------------|----------|
|                       | <b>OR CI95%</b>  | <b>p</b> | <b>OR CI95%</b>  | <b>p</b> |
| X (+) <sup>a</sup>    | 1.39 (0.93-2.06) | 0.104    | 1.18 (0.85-1.67) | 0.324    |

|                               |                   |        |                   |        |
|-------------------------------|-------------------|--------|-------------------|--------|
| P (+) <sup>b</sup>            | 1.25 (0.82-1.90)  | 0.293  | 1.26 (0.88-1.23)  | 0.205  |
| SNP1-A <sup>c</sup>           | 1.14 (0.76-1.71)  | 0.506  | 1.13 (0.78-1.62)  | 0.510  |
| SNP2-A <sup>d</sup>           | 1.05 (0.71-1.54)  | 0.304  | 1.08 (0.77-1.51)  | 0.649  |
| E4 (+) <sup>e</sup>           | 2.44 (1.61-3.69)  | <0.001 | 4.23 (2.93-6.12)  | <0.001 |
| Women                         | 1.07 (0.73-1.56)  | 0.705  | 1.67 (1.19-2.35)  | 0.003  |
| E4 (+)*Women <sup>f</sup>     | 2.27 (1.32-3.87)  | 0.003  | 4.85 (3.04-7.73)  | <0.001 |
| E4 (+)*Men <sup>g</sup>       | 2.74 (1.43-5.23)  | 0.002  | 3.19 (1.73-5.88)  | <0.001 |
| <b>Independent Effects</b>    |                   |        |                   |        |
| X (+) E4(-) <sup>h</sup>      | 1.04 (0.65-1.66)  | 0.863  | 1.18 (0.76-1.81)  | 0.452  |
| P (+) E4(-) <sup>h</sup>      | 0.86 (0.52-1.40)  | 0.545  | 1.19 (0.754-1.90) | 0.444  |
| SNP1-A(+)*E4(-) <sup>h</sup>  | 1.19 (0.74-1.92)  | 0.469  | 1.13 (0.73-1.76)  | 0.568  |
| SNP2-A(+)*E4(-) <sup>h</sup>  | 1.03 (0.65-1.66)  | 0.879  | 1.07 (0.70-1.64)  | 0.758  |
| <b>ESR1</b>                   |                   |        |                   |        |
| <b>Combined Effects</b>       |                   |        |                   |        |
| E4(+)*X <sup>i</sup>          | 3.17 (1.80-5.59)  | <0.001 | 5.07 (3.00-8.55)  | <0.001 |
| E4(+)*P <sup>i</sup>          | 2.74 (1.55-4.85)  | 0.001  | 5.35 (3.11-9.17)  | <0.001 |
| E4(+)*SNP1-A <sup>i</sup>     | 2.53 (1.31-4.90)  | <0.001 | 4.44 (2.48-7.93)  | <0.001 |
| <b>ESR2</b>                   |                   |        |                   |        |
| <b>Combined Effects</b>       |                   |        |                   |        |
| E4(+)*SNP2-A <sup>i</sup>     | 2.77 (1.55-4.93)  | 0.001  | 4.87 (2.91-8.17)  | <0.001 |
| <b>Genetic Profile (XPAA)</b> |                   |        |                   |        |
| <b>Independent Effects</b>    |                   |        |                   |        |
| XPAA*E4(-) <sup>j</sup>       | 1.31 (0.48-3.54)  | 0.590  | 1.19 (0.49-2.91)  | 0.696  |
| XPAA(-)*E4(+) <sup>k</sup>    | 2.53 (1.61-3.93)  | <0.001 | 4.32 (2.91-6.40)  | <0.001 |
| <b>Combined Effects</b>       |                   |        |                   |        |
| XPAA*E4(+) <sup>l</sup>       | 3.30 (1.28-8.54)  | 0.014  | 5.16 (2.19-12.14) | <0.001 |
| XPAA*E4(+)*Women <sup>m</sup> | 3.84 (1.09-13.57) | 0.036  | 8.04 (2.60-24.80) | <0.001 |
| XPAA*E4(+)*Men <sup>m</sup>   | 3.20 (0.73-14.11) | 0.124  | 3.57 (0.88-14.47) | 0.075  |

<sup>a</sup>Effect of sample with at least one X of RFLP XbaI. <sup>b</sup>Effect of sample with at least one P of RFLP PvuII.

<sup>c</sup> Effect of sample with at least one A allele of rs2228480. <sup>d</sup> Effect of sample with at least one A allele of rs4986938. <sup>e</sup> Effect of sample with at least one E4 allele of APOE gene. <sup>f</sup> Women selected by at least one E4 allele of APOE gene. <sup>g</sup> Men selected by at least one E4 allele of APOE gene. <sup>h</sup> Sample selected by at least one allele that is indicated and the absence of E4 allele of APOE gene. <sup>i</sup> Sample selected by at least one E4 allele of APOE gene and one of the alleles that is indicated. Reference category was sample control. <sup>j</sup> Sample selected by absence of E4 allele of APOE gene and the presence of XPAA. <sup>k</sup> Sample selected by absence of



1  
2  
3 XPAA and the presence by at least one E4 allele of APOE gene. Sample selected by at least one E4 allele of  
4 APOE gene and the presence XPAA.<sup>l</sup> Sample selected by at least one E4 allele of APOE gene and the presence  
5 of XPAA.<sup>m</sup> Women or Men selected by at least one E4 allele of APOE gene and the presence of XPAA. \* In all  
6 models reference category was sample control considering the age and sex (as appropriate)  
7  
8

9  
10 Aiming to avoid the combined effect of the less represented alleles of SNPs in candidates genes and  
11 APOE\* $\epsilon$ 4 allele, we analysed the risk of MCIa and AD according to the presence of X, P, SNP1-A and  
12 SNP2-A alleles and the absence of one APOE\* $\epsilon$ 4 allele. We did not found a significant effect, even when  
13 the samples were subgrouped by sex (data not shown).

14  
15 We further evaluated a possible synergistic effect between the less represented alleles of SNP in  
16 candidates genes and APOE\* $\epsilon$ 4 allele by using a multivariate logistic regression model. To analyse this  
17 effect, we subgrouped the subjects according to the presence of X, P, SNP1-A and SNP2-A alleles and at  
18 least one APOE\* $\epsilon$ 4 allele. A slight increase in nominal risk of MCI and AD was observed. The statistical  
19 analyzes were also conducted according to the gender (Supplementary table 1)  
20

21  
22  
23  
24  
25 In order to analyse the combined effect between estrogen polymorphisms, we created a genetic profile  
26 with the less represented alleles of these SNPs, expressed as XPAA. We did not found a significant risk in  
27 the absence of one APOE\* $\epsilon$ 4 allele, but analysing the combined effect of XPAA with APOE\* $\epsilon$ 4 allele, ORs  
28 were the following: MCIa, OR= 3.30 (95%CI 1.28-8.54, p=0.014) and AD, OR= 5.16 (95%CI 2.19-12.14,  
29 p<0.001), these ORs were even greater than the independent effect of APOE\* $\epsilon$ 4 allele with XPAA(-)  
30 (absence of this genetic profile). Although it was expected to obtain a greater effect in MCI men and AD  
31 women, according to the results showed in table 3, when the samples were subgrouped by sex taking  
32 into account the genetic profile, MCIa and AD women showed an increased OR, 3.84 (95%CI 1.09-13.57,  
33 p<0.036) and 8.04 (95%CI 2.60-24.80, p<0.001) respectively, comparing to men (table 4).  
34

## 35 DISCUSSION

36  
37 Our study shows that neither alleles nor genotypes of SNPs rs9340799 (A>G; XbaI), rs2234693 (PvuII;  
38 C>T) and rs2228480 (A>G) (*ESR1* gene) and SNP rs4986938 (A>G) (*ESR2* gene) are independently  
39 associated with the risk of MCIa or AD. The less represented alleles of SNPs in candidate genes (*ESR1*  
40 and *ESR2* genes) were not an independent risk factor for MCIa and AD in absence of APOE\* $\epsilon$ 4.  
41 Furthermore, the genetic profile created with the less represented alleles of SNPs in candidates genes  
42 were associated with an increased risk for MCIa and AD in women APOE\* $\epsilon$ 4 allele carriers.  
43

44 In our serie, APOE\* $\epsilon$ 4 allele seems to be an independent risk factor for the AD population, and this risk is  
45 highest for women. The APOE\* $\epsilon$ 4 allele also constitutes a risk factor for MCIa patients.  
46

47 On evaluating the combined effect of the APOE\* $\epsilon$ 4 allele in the presence of alleles or genotypes of *ESR1*  
48 and *ESR2* SNPs the risk for AD remains significant; though this association did not confer a relevant  
49 additional risk of MCIa and AD.  
50

51 When we created a genetic profile with the less represented alleles of *ESR1* and *ESR2* SNPs, expressed as  
52 XPAA, we did not found a significant risk in the absence of one APOE\* $\epsilon$ 4 allele. However, the presence  
53 of XPAA and at least one APOE\* $\epsilon$ 4 allele increases the risk in MCIa and AD women.  
54

55 Nowadays the most well-known polymorphism of *ESR1* gene related to AD are SNPs rs9340799 (A>G;  
56 XbaI) and rs2234693 (PvuII; T>C). Regarding to the association between XbaI with AD, several studies  
57 show that *ESR1* XbaI polymorphism is an additional risk factor<sup>32 44-46</sup>. However, other studies have not  
58  
59  
60

1  
2  
3 found this association<sup>34 47-50</sup>. These results and several meta-analysis<sup>1 51</sup> suggested that *ESR1* gene  
4 polymorphisms might be related to the individual susceptibility to AD, especially in the females.

5  
6 Concerning to the association between *ESR1* PvuII polymorphism and AD, several published studies have  
7 shown a great heterogeneity. In some of them no association has been found<sup>31 47 48 50 52</sup>. Other studies  
8 claimed a protective role of P allele of *ESR1* PvuII polymorphism<sup>34 45 46</sup>, whereas others found an  
9 opposite effect<sup>32 33 44 53-55</sup>. Some studies<sup>44</sup> have established an association between *ESR1* PP and XX  
10 genotypes with an increased risk for AD only in males (OR = 3.6, 95% CI = 1.2-10.9) and conferred a  
11 relevant additional risk of AD to subjects also carrying APOE\*ε4 allele, and in AD women. In this last  
12 study *ESR1* PP and XX genotypes were also associated with lower MMSE values (p = 0.0007). This data  
13 suggests that the involvement of *ESR1* polymorphisms (XbaI and PvuII) in AD onset is mediated by the  
14 regulation of *APOE* expression. Our data support this hypothesis, in accordance to the increased risk of  
15 MCI and AD observed in patients with APOE\*ε4 allele.

16  
17 In our knowledge, this is the first study to show evidences in support of the association of SNP  
18 rs2228480 with MCI and AD patients APOE\*ε4 allele carriers. Previously, this SNP only has been linked  
19 to the alternative regulation and transcript processing of *ESR1* gene<sup>36 56</sup>. To date have not been  
20 provided other information in relation to neurodegenerative disorders.

21  
22 Regarding polymorphisms of *ESR2* gene, several studies have been published with conflicting results:  
23 susceptibility for VaD but not for sporadic AD in elderly Jewish women was found in *ESR2* rs4986938  
24 polymorphism<sup>39</sup>. Pirskanen et al. (2005)<sup>37</sup> found that some gene variants of *ESR2* gene are associated  
25 with increased risk of AD in women (rs1271573 T/T genotype and rs1256043 T/T genotype) while others  
26 not (IVS31842, rs4986938). Lambert et al. (2001)<sup>48</sup> found no independent association of these  
27 polymorphisms with the risk of developing AD. One study suggests the *ESR2* allele 5 seems to be a  
28 protective factor<sup>57</sup>. Meta-analyses have not been performed on the following polymorphisms of *ESR2*  
29 gene since they lack published genotype data or the published genotype data was not eligible for  
30 inclusion. Other studies<sup>58</sup> have not detected a significant gene-gene interaction between *ESR1*, *ESR2*  
31 SNPs and *APOE* status but the analysis was performed in late onset AD.

32  
33 In contrast with previous studies we have analysed the genetic profile of the less represented alleles of  
34 *ESR1* and *ESR2* gene polymorphisms, XPAA; when considering the XPAA isolatedly, the genetic profile  
35 was not an independent risk factor for MCI and AD, but the combined effect with APOE\*ε4 allele  
36 confers an increased risk in women, whereas it does not contribute to the disease susceptibility in men.  
37 Analysis of haplotypes offers more power to detect associations than does simply focusing on a single  
38 variant, but in our case the expected results differ slightly from those expected. The combined effect  
39 observed between X, P, SNP1-A and SNP2-A alleles and at least one APOE\*ε4 allele seemed to point to  
40 an increased risk in MCI men and AD women. Our case-control study is relative medium size there are a  
41 small number samples carrying the genetic profile (<8% in MCI and AD patients, and <2% in controls)  
42 and APOE\*ε4 allele that may affects negatively the power. Nevertheless, according to our results, some  
43 variations in the ER genes in synergy with APOE\*ε4 allele may be associated with an increased risk of  
44 MCI and AD in women.

45  
46 Our results may suggest that the risk for MCI and AD may be modulated only when both *ESR1* and *ESR2*  
47 genes have several polymorphisms, which might be related to their expression and biological activities.  
48 The variations in the ERs genes may involve alternative gene regulation and transcript processing in the  
49 brain<sup>36</sup>. *APOE* gene expression can be differentially regulated depending on activation of ER subtypes. A  
50 recent study<sup>59</sup> demonstrated that activation of *ESR1* gene up-regulated APOE\*ε4 mRNA and protein  
51 expression in hippocampus. In contrast, activation of *ESR2* gene down-regulated the mRNA and protein  
52 expression of *APOE* gene. Thus, it is expected lower regulation in postmenopausal women<sup>60</sup>, conferring  
53 less protection against the effect of APOE\*ε4 allele.

54  
55 Relatively few studies have examined the epistatic effects between estrogen-related pathway genes and  
56 APOE\*ε4 allele. Postmenopausal women with down syndrome showed an increased risk of AD and  
57 elevated sex hormone binding globulin in those carrying *CYP17* and *CYP19* variants and APOE\*ε4 allele<sup>61</sup>.  
58 Both genes are involved in the production of neurosteroids (estrogens and testosterone). In addition,  
59

1  
2  
3 estrogens have been shown to affect amyloid precursor protein metabolism, by increasing the secretory  
4 metabolism of amyloid protein precursor (*APP*). Estrogens are also a potent factor that not only  
5 prevents vascular disease but also improves blood flow, including blood flow in regions on the brain  
6 affected by AD<sup>62</sup>. Synaptic sprouting by estradiol in a model of AD may operate via an APOE\*ε4-  
7 dependent mechanism<sup>63</sup>. Cholinergic neurons that are implicated in cognitive functions may be  
8 regulated by estrogens. The distribution of ERs corresponds to that of cholinergic system<sup>64</sup>. The  
9 important decrease in endogenous estrogen levels after menopause may contribute to the development  
10 of AD<sup>65</sup>. Despite the protective effect of estrogens upon AD, this effect might to be modified by ERs  
11 polymorphisms, particularly in APOE\*ε4 allele carriers. Thus, the current state of knowledge of the role  
12 of estrogens for preventing dementia in postmenopausal women should be reviewed.

13  
14 Although the prevalence and incidence of AD are higher in women, men also may have the same effect  
15 due to SNPs in ER genes. It has been observed that while androgens have specific receptors to exert its  
16 neuroprotective action, they may also exert their actions indirectly via *CYP17* by aromatization of  
17 testosterone to estradiol<sup>66</sup> or directly through *ESR2* binding capacity of the metabolite  
18 dihydrotestosterone<sup>67</sup>. To date, it is unclear whether SNPs in ER genes would increase the risk of AD or  
19 MCIa in men. Our partial data trend to increase the risk of MCIa in men. Future studies should elucidate  
20 whether there is a relationship between ER genes and MCIa in men.

21  
22 The strengths of our study are its multicenter nature including AD patients, healthy controls, and MCIa  
23 patients. In our knowledge, ours is the first study to investigate an association between polymorphisms  
24 of ER (rs9340799, rs2234693, rs2228480 and rs4986938) and cognitive function not only in AD patients,  
25 but also in MCIa. Moreover, the patient sample is not small, allowing gender stratification.

26  
27 Some limitations in our study must be addressed. The study population comes from the hospital setting.  
28 A community-based study could provide more information. The serum levels of estradiol have not been  
29 measured, and we do not know whether the patients received ERT in the last years. We also include a  
30 sample of patients with MCIa, this stage is probably a heterogeneous clinical entity. But, the broad  
31 battery of neuropsychological test used in our sample might ensure a highest homogeneity.

## 32 33 CONCLUSIONS

34  
35 In our study, APOE\*ε4 allele is an independent risk factor for MCIa and AD patients. The combined  
36 effect of the APOE\*ε4 allele and the less represented alleles of *ESR1* and *ESR2* SNPs remains the risk for  
37 MCIa and AD; this association confers a relevant additional risk of AD and MCIa, in women and men  
38 respectively. Nevertheless, the genetic profile with the less represented alleles of *ESR1* and *ESR2* gene  
39 polymorphisms, expressed as XPAA, did not increased the risk of cognitive impairment in the absence of  
40 one APOE\*ε4 allele, but the presence of XPAA and at least one APOE\*ε4 allele only increases the risk in  
41 MCIa and AD women.

## 42 43 44 45 OTHER INFORMATION:

### 46 47 48 Competing interests:

49 None.

### 50 51 52 53 Funding:

54 This work was sponsored by grants from the Federación de Asociaciones de Familiares de enfermos de  
55 Alzheimer de Euskadi, Fondo de Investigación Sanitaria del Instituto Carlos III (Madrid), Pfizer  
56 Foundation and Ayudas a la Investigación de la Obra Social de la Caja Vital Kutxa.

## Contributorship

MFM: main investigator, conceived of the study, and participated in its design and coordination, and drafted the manuscript.

XEM: co-investigator; participated in its design and coordination, and drafted the manuscript

EBM: Participated in the drafting of the manuscript.

IUS: Participated in the drafting of the manuscript.

LGA: co-investigator; participated in its design and coordination, and drafted the manuscript.

FGB: co-investigator; participated in its design and coordination, and drafted the manuscript.

MAA: co-investigator; participated in its design and coordination, and drafted the manuscript.

AMS: performed the battery of neuropsychological tests.

RBG: performed the battery of neuropsychological tests.

SIB: performed the battery of neuropsychological tests.

JMUV: co-investigator; participated in its design and coordination. BIJ: co-investigator; participated in its design and coordination.

MAGB: co-investigator; participated in its design and coordination. JML: co-investigator; participated in its design and coordination.

NO: performed the battery of neuropsychological tests.

MBA: performed the battery of neuropsychological tests.

MCZ: performed the battery of neuropsychological tests.

MMP: co-investigator; participated in its design and coordination, and drafted the manuscript.

All authors read and approved the final manuscript.

## Data sharing

No additional data available.

## REFERENCES

1. Bertram L, McQueen MB, Mullin K, et al. Systematic meta-analyses of Alzheimer disease genetic association studies: the AlzGene database. *Nat Genet* 2007;39(1):17-23.
2. Saunders AM, Strittmatter WJ, Schmechel D, et al. Association of apolipoprotein E allele epsilon 4 with late-onset familial and sporadic Alzheimer's disease. *Neurology* 1993;43(8):1467-72.
3. Carrasquillo MM, Belbin O, Hunter TA, et al. Replication of CLU, CR1, and PICALM associations with alzheimer disease. *Arch Neurol* ;67(8):961-4.
4. Harold D, Abraham R, Hollingworth P, et al. Genome-wide association study identifies variants at CLU and PICALM associated with Alzheimer's disease. *Nat Genet* 2009;41(10):1088-93.
5. Lambert JC, Heath S, Even G, et al. Genome-wide association study identifies variants at CLU and CR1 associated with Alzheimer's disease. *Nat Genet* 2009;41(10):1094-9.
6. Seshadri S, Fitzpatrick AL, Ikram MA, et al. Genome-wide analysis of genetic loci associated with Alzheimer disease. *JAMA* 2010 ;303(18):1832-40.
7. Garcia-Segura LM, McCarthy MM. Minireview: Role of glia in neuroendocrine function. *Endocrinology* 2004;145(3):1082-6.
8. Hu R, Cai WQ, Wu XG, et al. Astrocyte-derived estrogen enhances synapse formation and synaptic transmission between cultured neonatal rat cortical neurons. *Neuroscience* 2007 ;144(4):1229-40.
9. Marin R, Guerra B, Alonso R, et al. Estrogen activates classical and alternative mechanisms to orchestrate neuroprotection. *Curr Neurovasc Res* 2005;2(4):287-301.
10. Hao J, Janssen WG, Tang Y, et al. Estrogen increases the number of spinophilin-immunoreactive spines in the hippocampus of young and aged female rhesus monkeys. *J Comp Neurol* 2003;465(4):540-50.
11. Woolley CS, McEwen BS. Estradiol mediates fluctuation in hippocampal synapse density during the estrous cycle in the adult rat. *J Neurosci* 1992;12(7):2549-54.
12. Pike CJ, Carroll JC, Rosario ER, et al. Protective actions of sex steroid hormones in Alzheimer's disease. *Front Neuroendocrinol* 2009;30(2):239-58.
13. Amtul Z, Wang L, Westaway D, et al. Neuroprotective mechanism conferred by 17beta-estradiol on the biochemical basis of Alzheimer's disease. *Neuroscience*;169(2):781-6.
14. Janicki SC, Schupf N. Hormonal influences on cognition and risk for Alzheimer's disease. *Curr Neurol Neurosci Rep*;10(5):359-66.
15. Seshadri S, Fitzpatrick AL, Ikram MA, et al. Genome-wide analysis of genetic loci associated with Alzheimer disease. *JAMA*;303(18):1832-40.
16. Holland D, Desikan RS, Dale AM, et al. Higher Rates of Decline for Women and Apolipoprotein E {varepsilon}4 Carriers. *AJNR Am J Neuroradiol*.
17. Callahan MJ, Lipinski WJ, Bian F, et al. Augmented senile plaque load in aged female beta-amyloid precursor protein-transgenic mice. *Am J Pathol* 2001;158(3):1173-7.
18. Wang J, Tanila H, Puolivali J, et al. Gender differences in the amount and deposition of amyloidbeta in APPswe and PS1 double transgenic mice. *Neurobiol Dis* 2003;14(3):318-27.
19. Baldereschi M, Di Carlo A, Lepore V, et al. Estrogen-replacement therapy and Alzheimer's disease in the Italian Longitudinal Study on Aging. *Neurology* 1998;50(4):996-1002.
20. Tang MX, Jacobs D, Stern Y, et al. Effect of oestrogen during menopause on risk and age at onset of Alzheimer's disease. *Lancet* 1996;348(9025):429-32.

- 1
- 2
- 3 21. Kawas C, Resnick S, Morrison A, et al. A prospective study of estrogen replacement
- 4 therapy and the risk of developing Alzheimer's disease: the Baltimore Longitudinal
- 5 Study of Aging. *Neurology* 1997;48(6):1517-21.
- 6
- 7 22. Resnick SM, Metter EJ, Zonderman AB. Estrogen replacement therapy and longitudinal
- 8 decline in visual memory. A possible protective effect? *Neurology* 1997;49(6):1491-7.
- 9 23. Hogervorst E, Bandelow S. Brain and cognition. Is there any case for improving cognitive
- 10 function in menopausal women using estrogen treatment? *Minerva Ginecol*
- 11 2009;61(6):499-515.
- 12 24. Maki PM, Sundermann E. Hormone therapy and cognitive function. *Hum Reprod Update*
- 13 2009;15(6):667-81.
- 14 25. Henderson VW. Alzheimer's disease: Review of hormone therapy trials and implications
- 15 for treatment and prevention after menopause. *J Steroid Biochem Mol Biol*.
- 16 26. Nathan BP, Barsukova AG, Shen F, et al. Estrogen facilitates neurite extension via
- 17 apolipoprotein E in cultured adult mouse cortical neurons. *Endocrinology*
- 18 2004;145(7):3065-73.
- 19 27. Shughrue P, Scrimo P, Lane M, et al. The distribution of estrogen receptor-beta mRNA in
- 20 forebrain regions of the estrogen receptor-alpha knockout mouse. *Endocrinology*
- 21 1997;138(12):5649-52.
- 22 28. Shughrue PJ, Lane MV, Merchenthaler I. Comparative distribution of estrogen receptor-
- 23 alpha and -beta mRNA in the rat central nervous system. *J Comp Neurol*
- 24 1997;388(4):507-25.
- 25 29. Castagnoli A, Maestri I, Bernardi F, et al. PvuII RFLP inside the human estrogen receptor
- 26 gene. *Nucleic Acids Res* 1987;15(2):866.
- 27 30. Yaffe K, Lui LY, Grady D, et al. Estrogen receptor 1 polymorphisms and risk of cognitive
- 28 impairment in older women. *Biological psychiatry* 2002;51(8):677-82.
- 29 31. Maruyama H, Toji H, Harrington CR, et al. Lack of an association of estrogen receptor alpha
- 30 gene polymorphisms and transcriptional activity with Alzheimer disease. *Arch Neurol*
- 31 2000;57(2):236-40.
- 32 32. Brandi ML, Becherini L, Gennari L, et al. Association of the estrogen receptor alpha gene
- 33 polymorphisms with sporadic Alzheimer's disease. *Biochem Biophys Res Commun*
- 34 1999;265(2):335-8.
- 35 33. Isoe-Wada K, Maeda M, Yong J, et al. Positive association between an estrogen receptor
- 36 gene polymorphism and Parkinson's disease with dementia. *Eur J Neurol*
- 37 1999;6(4):431-5.
- 38 34. Mattila KM, Axelman K, Rinne JO, et al. Interaction between estrogen receptor 1 and the
- 39 epsilon4 allele of apolipoprotein E increases the risk of familial Alzheimer's disease in
- 40 women. *Neurosci Lett* 2000;282(1-2):45-8.
- 41 35. Pavao M, Traish AM. Estrogen receptor antibodies: specificity and utility in detection,
- 42 localization and analyses of estrogen receptor alpha and beta. *Steroids* 2001;66(1):1-
- 43 16.
- 44 36. Weickert CS, Miranda-Angulo AL, Wong J, et al. Variants in the estrogen receptor alpha
- 45 gene and its mRNA contribute to risk for schizophrenia. *Hum Mol Genet*
- 46 2008;17(15):2293-309.
- 47 37. Pirskanen M, Hiltunen M, Mannermaa A, et al. Estrogen receptor beta gene variants are
- 48 associated with increased risk of Alzheimer's disease in women. *Eur J Hum Genet*
- 49 2005;13(9):1000-6.
- 50
- 51
- 52
- 53
- 54
- 55
- 56
- 57
- 58
- 59
- 60

- 1
- 2
- 3 38. Westberg L, Hakansson A, Melke J, et al. Association between the estrogen receptor beta
- 4 gene and age of onset of Parkinson's disease. *Psychoneuroendocrinology*
- 5 2004;29(8):993-8.
- 6
- 7 39. Dresner-Pollak R, Kinnar T, Friedlander Y, et al. Estrogen receptor beta gene variant is
- 8 associated with vascular dementia in elderly women. *Genet Test Mol Biomarkers*
- 9 2009;13(3):339-42.
- 10
- 11 40. Petersen RC. Mild cognitive impairment clinical trials. *Nat Rev Drug Discov* 2003;2(8):646-
- 12 53.
- 13 41. Wilton S, Lim L. Rapid identification of ApoE alleles by multiple-single-strand conformation
- 14 polymorphism (SSCP) analysis. *Trends Genet* 1995;11(9):341.
- 15 42. Alvarez-Alvarez M, Galdos L, Fernandez-Martinez M, et al. 5-Hydroxytryptamine 6 receptor
- 16 (5-HT(6)) receptor and apolipoprotein E (ApoE) polymorphisms in patients with
- 17 Alzheimer's disease in the Basque Country. *Neurosci Lett* 2003;339(1):85-7.
- 18 43. Rousset F. genepop'007: a complete re-implementation of the genepop software for
- 19 Windows and Linux. *Molecular ecology resources* 2008;8(1):103-6.
- 20
- 21 44. Corbo RM, Gambina G, Ruggeri M, et al. Association of estrogen receptor alpha (ESR1)
- 22 PvuII and XbaI polymorphisms with sporadic Alzheimer's disease and their effect on
- 23 apolipoprotein E concentrations. *Dement Geriatr Cogn Disord* 2006;22(1):67-72.
- 24 45. Monastero R, Cefalu AB, Camarda C, et al. Association of estrogen receptor alpha gene
- 25 with Alzheimer's disease: a case-control study. *J Alzheimers Dis* 2006;9(3):273-8.
- 26 46. Porrello E, Monti MC, Sinforiani E, et al. Estrogen receptor alpha and APOEepsilon4
- 27 polymorphisms interact to increase risk for sporadic AD in Italian females. *Eur J Neurol*
- 28 2006;13(6):639-44.
- 29
- 30 47. den Heijer T, Schuit SC, Pols HA, et al. Variations in estrogen receptor alpha gene and risk
- 31 of dementia, and brain volumes on MRI. *Mol Psychiatry* 2004;9(12):1129-35.
- 32 48. Lambert JC, Harris JM, Mann D, et al. Are the estrogen receptors involved in Alzheimer's
- 33 disease? *Neurosci Lett* 2001;306(3):193-7.
- 34 49. Prince JA, Feuk L, Sawyer SL, et al. Lack of replication of association findings in complex
- 35 disease: an analysis of 15 polymorphisms in prior candidate genes for sporadic
- 36 Alzheimer's disease. *Eur J Hum Genet* 2001;9(6):437-44.
- 37 50. Usui C, Shibata N, Ohnuma T, et al. No genetic association between the myeloperoxidase
- 38 gene -463 polymorphism and estrogen receptor-alpha gene polymorphisms and
- 39 Japanese sporadic Alzheimer's disease. *Dement Geriatr Cogn Disord* 2006;21(5-6):296-
- 40 9.
- 41
- 42 51. Luckhaus C, Sand PG. Estrogen Receptor 1 gene (ESR1) variants in Alzheimer's disease.
- 43 Results of a meta-analysis. *Aging Clin Exp Res* 2007;19(2):165-8.
- 44 52. Rodriguez E, Mateo I, Llorca J, et al. No association between low density lipoprotein
- 45 receptor genetic variants and Alzheimer's disease risk. *Am J Med Genet B*
- 46 *Neuropsychiatr Genet* 2006;141B(5):541-3.
- 47 53. Boada M, Antunez C, Lopez-Arrieta J, et al. Estrogen receptor alpha gene variants are
- 48 associated with Alzheimer's disease. *Neurobiol Aging*.
- 49 54. Ji Y, Urakami K, Wada-Isoe K, et al. Estrogen receptor gene polymorphisms in patients with
- 50 Alzheimer's disease, vascular dementia and alcohol-associated dementia. *Dement*
- 51 *Geriatr Cogn Disord* 2000;11(3):119-22.
- 52 55. Lin GF, Ma QW, Zhang DS, et al. Polymorphism of alpha-estrogen receptor and aryl
- 53 hydrocarbon receptor genes in dementia patients in Shanghai suburb. *Acta Pharmacol*
- 54 *Sin* 2003;24(7):651-6.
- 55
- 56
- 57
- 58
- 59
- 60

- 1  
2  
3 56. Long JR, Xu H, Zhao LJ, et al. The oestrogen receptor alpha gene is linked and/or associated  
4 with age of menarche in different ethnic groups. *J Med Genet* 2005;42(10):796-800.  
5  
6 57. Forsell C, Enmark E, Axelman K, Blomberg M, Wahlund LO, Gustafsson JA, et al.  
7 Investigations of a CA repeat in the oestrogen receptor beta gene in patients with  
8 Alzheimer's disease. *Eur J Hum Genet* 2001;9(10):802-4.  
9  
10 58. Goumidi L, Dahlman-Wright K, Tapia-Paez I, et al. Study of estrogen receptor-alpha and  
11 receptor-beta gene polymorphisms on Alzheimer's disease. *Journal of Alzheimer's*  
12 *disease : JAD*;26(3):431-9.  
13  
14 59. Wang X, Dykens JA, Perez E, et al. Neuroprotective effects of 17beta-estradiol and  
15 nonfeminizing estrogens against H2O2 toxicity in human neuroblastoma SK-N-SH cells.  
16 *Mol Pharmacol* 2006;70(1):395-404.  
17  
18 60. Ishunina TA, van Heerikhuizen JJ, Ravid R, et al. Estrogen receptors and metabolic activity in  
19 the human tuberomammillary nucleus: changes in relation to sex, aging and Alzheimer's  
20 disease. *Brain research* 2003;988(1-2):84-96.  
21  
22 61. Chace C, Pang D, Weng C, et al. Variants in CYP17 and CYP19 cytochrome P450 genes are  
23 associated with onset of Alzheimer's disease in women with down syndrome. *Journal*  
24 *of Alzheimer's disease : JAD* 2012;28(3):601-12.  
25  
26 62. Birge SJ. The role of estrogen in the treatment of Alzheimer's disease. *Neurology*  
27 1997;48(5 Suppl 7):S36-41.  
28  
29 63. Stone DJ, Rozovsky I, Morgan TE, et al. Increased synaptic sprouting in response to  
30 estrogen via an apolipoprotein E-dependent mechanism: implications for Alzheimer's  
31 disease. *J Neurosci* 1998;18(9):3180-5.  
32  
33 64. Toran-Allerand CD, Miranda RC, Bentham WD, et al. Estrogen receptors colocalize with  
34 low-affinity nerve growth factor receptors in cholinergic neurons of the basal  
35 forebrain. *Proc Natl Acad Sci U S A* 1992;89(10):4668-72.  
36  
37 65. Gandy S. Estrogen and neurodegeneration. *Neurochem Res* 2003;28(7):1003-8.  
38  
39 66. Raber J. AR, apoE, and cognitive function. *Hormones and behavior* 2008;53(5):706-15.  
40  
41 67. Lund TD, Hinds LR, Handa RJ. The androgen 5alpha-dihydrotestosterone and its metabolite  
42 5alpha-androstan-3beta, 17beta-diol inhibit the hypothalamo-pituitary-adrenal  
43 response to stress by acting through estrogen receptor beta-expressing neurons in the  
44 hypothalamus. *The Journal of neuroscience : the official journal of the Society for*  
45 *Neuroscience* 2006;26(5):1448-56.  
46  
47  
48  
49  
50  
51  
52  
53  
54  
55  
56  
57  
58  
59  
60



STROBE Statement—Checklist of items that should be included in reports of *case-control studies*

|                              | Item No | Recommendation                                                                                                                                                                                        |
|------------------------------|---------|-------------------------------------------------------------------------------------------------------------------------------------------------------------------------------------------------------|
| Title and abstract           | 1       | (a) Indicate the study's design with a commonly used term in the title or the abstract<br><i>Page 2</i>                                                                                               |
|                              |         | (a) Provide in the abstract an informative and balanced summary of what was done and what was found<br><i>Page 2</i>                                                                                  |
| <b>Introduction</b>          |         |                                                                                                                                                                                                       |
| Background/rationale         | 2       | Explain the scientific background and rationale for the investigation being reported<br><i>Page 3</i>                                                                                                 |
| Objectives                   | 3       | State specific objectives, including any prespecified hypotheses<br><i>Page 4</i>                                                                                                                     |
| <b>Methods</b>               |         |                                                                                                                                                                                                       |
| Study design                 | 4       | Present key elements of study design early in the paper<br><i>Page 4</i>                                                                                                                              |
| Setting                      | 5       | Describe the setting, locations, and relevant dates, including periods of recruitment, exposure, follow-up, and data collection<br><i>Page 4-5</i>                                                    |
| Participants                 | 6       | (a) Give the eligibility criteria, and the sources and methods of case ascertainment and control selection. Give the rationale for the choice of cases and controls<br><i>Page 4-5</i>                |
|                              |         | (b) For matched studies, give matching criteria and the number of controls per case                                                                                                                   |
| Variables                    | 7       | Clearly define all outcomes, exposures, predictors, potential confounders, and effect modifiers. Give diagnostic criteria, if applicable<br><i>Page 4-6</i>                                           |
| Data sources/<br>measurement | 8*      | For each variable of interest, give sources of data and details of methods of assessment (measurement). Describe comparability of assessment methods if there is more than one group<br><i>Page 4</i> |
| Bias                         | 9       | Describe any efforts to address potential sources of bias<br><i>Page 6</i>                                                                                                                            |
| Study size                   | 10      | Explain how the study size was arrived at                                                                                                                                                             |
| Quantitative variables       | 11      | Explain how quantitative variables were handled in the analyses. If applicable, describe which groupings were chosen and why                                                                          |
| Statistical methods          | 12      | (a) Describe all statistical methods, including those used to control for confounding<br><i>Page 5-6</i>                                                                                              |
|                              |         | (b) Describe any methods used to examine subgroups and interactions                                                                                                                                   |
|                              |         | (c) Explain how missing data were addressed                                                                                                                                                           |
|                              |         | (d) If applicable, explain how matching of cases and controls was addressed                                                                                                                           |

(e) Describe any sensitivity analyses

---

**Results**

---

Participants 13\* (a) Report numbers of individuals at each stage of study—eg numbers potentially eligible, examined for eligibility, confirmed eligible, included in the study, completing follow-up, and analysed

Page 4-5

---

(b) Give reasons for non-participation at each stage

---

(c) Consider use of a flow diagram

---

Descriptive data 14\* (a) Give characteristics of study participants (eg demographic, clinical, social) and information on exposures and potential confounders

Page 4-6

---

(b) Indicate number of participants with missing data for each variable of interest

Page 4

---

Outcome data 15\* Report numbers in each exposure category, or summary measures of exposure

Page 6-9

---

Main results 16 (a) Give unadjusted estimates and, if applicable, confounder-adjusted estimates and their precision (eg, 95% confidence interval). Make clear which confounders were adjusted for and why they were included

Page 9-10

---

(b) Report category boundaries when continuous variables were categorized

---

(c) If relevant, consider translating estimates of relative risk into absolute risk for a meaningful time period

---

1  
2  
3 Other analyses 17 Report other analyses done—eg analyses of subgroups and interactions, and sensitivity analyses  
4  
5

---

#### Discussion

6  
7 Key results 18 Summarise key results with reference to study objectives  
8

Page 11

9  
10 Limitations 19 Discuss limitations of the study, taking into account sources of potential bias or imprecision.  
11 Discuss both direction and magnitude of any potential bias  
12

Page 12

13 Interpretation 20 Give a cautious overall interpretation of results considering objectives, limitations, multiplicity  
14 of analyses, results from similar studies, and other relevant evidence  
15

Page 11-12

16  
17 Generalisability 21 Discuss the generalisability (external validity) of the study results  
18

Page 12 (multicenter nature)

---

#### Other information

19  
20  
21 Funding 22 Give the source of funding and the role of the funders for the present study and, if applicable,  
22 for the original study on which the present article is based  
23

Page 13

24  
25  
26 \*Give information separately for cases and controls.  
27

28 **Note:** An Explanation and Elaboration article discusses each checklist item and gives methodological background and  
29 published examples of transparent reporting. The STROBE checklist is best used in conjunction with this article (freely  
30 available on the Web sites of PLoS Medicine at <http://www.plosmedicine.org/>, Annals of Internal Medicine at  
31 <http://www.annals.org/>, and Epidemiology at <http://www.epidem.com/>). Information on the STROBE Initiative is  
32 available at <http://www.strobe-statement.org>.  
33  
34  
35  
36  
37  
38  
39  
40  
41  
42  
43  
44  
45  
46  
47  
48  
49  
50  
51  
52  
53  
54  
55  
56  
57  
58  
59  
60

## Estrogen receptor polymorphisms are an associated risk factor for mild cognitive impairment and Alzheimer disease in women APOE ε4 carriers

Manuel Fernández-Martínez<sup>1\*§</sup>, Xabier Elcoroaristizabal Martín<sup>2\*</sup>, Elisa Blanco Martín<sup>1</sup>, Luis Galdos Alcelay<sup>3</sup>, Iratxe Ugarriza Serrano<sup>1</sup>, Fernando Gómez Busto<sup>4</sup>, Maite Álvarez-Álvarez<sup>2</sup>, Ana Molano Salazar<sup>1</sup>, Rocio Bereincua Gandarias<sup>1</sup>, Sandra Inglés Borda<sup>3</sup>, Juan María Uterga Valiente<sup>5</sup>, Begoña Indakoetxea Juanbeltz<sup>6</sup>, María Ángeles Gómez Beldarraín<sup>7</sup>, Josefa Moraza López<sup>8</sup>, Myriam Barandiarán Amillano<sup>6</sup>, Marian M. de Pancorbo<sup>2</sup>.

\*Equally Contributed.

§Corresponding author.

<sup>1</sup>Neurology Department, Hospital Universitario Cruces, BioCruces Health Research Institute (Barakaldo-Vizcaya), Spain. <sup>2</sup>BIOMICS Research Group, Dpt. of Z. and Cellular Biology A. Centro de Investigación y Estudios Avanzados Lucio Lascaray (CIEA), University of Basque Country UPV/EHU (Vitoria-Gasteiz), Spain. <sup>3</sup>Neurology Department, Hospital Universitario Txagorritxu, (Vitoria-Gasteiz), Spain. <sup>4</sup>San Prudencio Comprehensive Care Center for elderly, Vitoria-Gasteiz city Council, Basque Country, Spain. <sup>5</sup>Neurology Department, Hospital Universitario Basurto, (Bilbao-Vizcaya) Spain. <sup>6</sup>Neurology Department, Hospital Universitario Donostia, (Donostia-Guipuzcoa). <sup>7</sup>Neurology Department, Hospital de Galdakao (Galdakao -Vizcaya) <sup>8</sup>Neurology Department, Hospital Santiago Apóstol, (Vitoria-Gasteiz) Spain.

§ Manuel Fernández Martínez - [mfernandezm@oroitu.com](mailto:mfernandezm@oroitu.com)  
 Xabier Elcoroaristizabal Martín - [xabierelcoro@gmail.com](mailto:xabierelcoro@gmail.com)  
 Elisa Blanco Martín - [eliblam@gmail.com](mailto:eliblam@gmail.com)  
 Luis Galdos Alcelay - [luis@lurra.jazztel.es](mailto:luis@lurra.jazztel.es)  
 Iratxe Ugarriza Serrano - [IRATXE.UGARRIZASERRANO@osakidetza.net](mailto:IRATXE.UGARRIZASERRANO@osakidetza.net)  
 Fernando Gómez Busto - [fgomezbusto@vitoria-gasteiz.org](mailto:fgomezbusto@vitoria-gasteiz.org)  
 Maite Álvarez-Álvarez - [maite.alvarez@ehu.es](mailto:maite.alvarez@ehu.es)  
 Ana Molano Salazar - [psimolano@yahoo.es](mailto:psimolano@yahoo.es)  
 Rocio Bereincua Gandarias - [rocio.bgan@yahoo.es](mailto:rocio.bgan@yahoo.es)  
 Sandra Inglés Borda - [sibcat02@yahoo.es](mailto:sibcat02@yahoo.es)  
 Juan María Uterga Valiente - [JUANMARIA.UTERGAVALIENTE@osakidetza.net](mailto:JUANMARIA.UTERGAVALIENTE@osakidetza.net)  
 Begoña Indakoetxea Juanbeltz - [bindakoetxeaj@meditex.es](mailto:bindakoetxeaj@meditex.es)  
 María Ángeles Gómez Beldarraín - [mariaangeles.gomezbeldarrain@osakidetza.net](mailto:mariaangeles.gomezbeldarrain@osakidetza.net)  
 Josefa Moraza López - [m.j.moraza@gmail.com](mailto:m.j.moraza@gmail.com)  
 Myriam Barandiarán Amillano - [MYRIAM.BARANDIARANAMILLANO@osakidetza.net](mailto:MYRIAM.BARANDIARANAMILLANO@osakidetza.net)  
 Marian M. de Pancorbo - [marianpancorbo@gmail.com](mailto:marianpancorbo@gmail.com)

Style Definition: Normal

Formatted: Font: Calibri

Formatted: Superscript

Formatted: Font: Calibri, English (U.S.)

Formatted: Font: Calibri

Formatted: Font: Calibri, English (U.S.)

Formatted: Font: Calibri

Formatted: Font: Calibri, English (U.S.)

Formatted: Font: Calibri

Formatted: Font: Calibri, Portuguese (Portugal)

Formatted: Font: Calibri

Formatted: Font: Calibri

Formatted: Font: Calibri, English (U.S.)

Formatted: Font: Calibri

Formatted: Font: Calibri, English (U.S.)

Formatted: Font: Calibri

## ABSTRACT

**Objetives:** Examine the role of the single nucleotide polymorphisms (SNPs) in the estrogen receptor genes: rs9340799, rs2234693, rs2228480 (in the *ESR1* gene) and rs4986938 (in the *ESR2* gene) as a risk factor for amnesic mild cognitive impairment (MCI) and Alzheimer's disease (AD) and its possible association with *APOE* gene

**Design:** We have investigated the independent and combined association of different alleles of the estrogen receptor genes and *APOE*\* $\epsilon$ 4 allele with cognitive impairment by using a case-control design.

**Setting:** Subjects were prospectively recruited from the Neurology Departments of several Basque Country hospitals.

**Participants:** This study comprised 816 Caucasian subjects that were aged 50 years and older: 204 MCI, 350 sporadic AD patients and 262 healthy controls,

**Primary and secondary outcome measures:** Clinical criteria and neuropsychological tests were used to establish the diagnostic groups (MCI, AD and healthy controls). A dichotomous variable was used for each allele and genotype and the association with MCI and AD was established using Logistic Regression Models.

**Results:** Neither alleles nor genotypes of SNPs rs9340799, rs2234693, rs2228480 and rs4986938 of estrogen receptor genes (*ESR1* and *ESR2*) are independently associated with the risk of MCI or AD. However, the genetic profile created with the combination of the less represented alleles of these SNPs (expressed as XPAA) was associated with an increased risk for MCI (OR= 3.30, 95%CI 1.28-8.54,  $p=0.014$ ) and AD (OR= 5.16, 95% CI 2.19-12.14,  $p<0.001$ ) in women *APOE*\* $\epsilon$ 4 allele carriers.

**Conclusions:** The less represented alleles of SNPs studied are associated with DCLa y to with MCI and AD in subjects *APOE*\* $\epsilon$ 4 carriers. Particularly, the genetic profile created with the less represented alleles of *ESR1* and *ESR2* SNPs are associated with an increased risk for MCI and AD in women *APOE*\* $\epsilon$ 4 allele carriers.

## ARTICLE SUMMARY

### Article focus:

- Alzheimer's disease's **actiology** is complex and multifactorial
- Estrogen receptors have several polymorphisms that seem to be related **with** the effect of the main risk factor to Alzheimer disease (AD), the *APOE* gene.
- The aim of the study is to examine the role of the single nucleotide polymorphisms (SNPs): rs9340799, rs2234693, rs2228480 and rs4986938 as a risk factor for mild cognitive impairment (MCI) and AD and its possible association with *APOE* gene

### Key message

- APOE*\* $\epsilon$ 4 allele is an independent risk factor for the AD population, and this risk is **highest for higher in women**

|           |          |
|-----------|----------|
| Formatted | ... [1]  |
| Formatted | ... [4]  |
| Formatted | ... [2]  |
| Formatted | ... [3]  |
| Formatted | ... [5]  |
| Formatted | ... [6]  |
| Formatted | ... [7]  |
| Formatted | ... [8]  |
| Formatted | ... [9]  |
| Formatted | ... [10] |
| Formatted | ... [11] |
| Formatted | ... [12] |
| Formatted | ... [13] |
| Formatted | ... [14] |
| Formatted | ... [15] |
| Formatted | ... [16] |
| Formatted | ... [17] |
| Formatted | ... [18] |
| Formatted | ... [19] |
| Formatted | ... [20] |
| Formatted | ... [21] |
| Formatted | ... [22] |
| Formatted | ... [23] |
| Formatted | ... [24] |
| Formatted | ... [25] |
| Formatted | ... [26] |
| Formatted | ... [27] |
| Formatted | ... [28] |
| Formatted | ... [29] |
| Formatted | ... [30] |
| Formatted | ... [31] |
| Formatted | ... [32] |
| Formatted | ... [33] |
| Formatted | ... [34] |
| Formatted | ... [35] |
| Formatted | ... [36] |
| Formatted | ... [37] |
| Formatted | ... [38] |
| Formatted | ... [39] |
| Formatted | ... [40] |
| Formatted | ... [41] |
| Formatted | ... [42] |
| Formatted | ... [43] |
| Formatted | ... [44] |
| Formatted | ... [45] |
| Formatted | ... [46] |
| Formatted | ... [47] |

- rs9340799, rs2234693, rs2228480 and rs4986938 are not independently associated with the risk of MCI and AD
- The less represented alleles of SNPs studied are associated with MCI and AD in [subjects APOE\\*E4 carriers](#)

Formatted: Font: Calibri

**Strengths and limitations of this study**

- It was one of the first studies to investigate and association between polymorphisms of ER [genes](#) and cognitive function not only in AD patients, but also in [MCI MCIa](#).
- It is a multicenter study with a patient sample that allows gender stratification.
- The study population comes from the hospital setting. A community-based study could provide more information.
- The levels of estradiol and the previous estrogen replacement therapy were unknown.

Formatted: Font: Calibri

Formatted: Font: Calibri

**INTRODUCTION:**

Alzheimer’s disease (AD) is the most common form of dementia, currently affecting over 9 million americans and europeans, its ~~ethiology is complex and multifactorial. Several genes associated with sporadic and familial AD have been identified, but it is estimated that probably more than 50% of genetic risk remains unidentified~~ ~~[1]~~ etiology is complex and multifactorial. Several genes associated with sporadic and familial AD have been identified, but it is estimated that probably more than 50% of genetic risk remains unidentified <sup>1</sup>.

Formatted: Font: Calibri

~~The apolipoprotein E gene (APOE) is a genetic factor closely related to late onset AD disease, and constitutes a strong independent risk factor for sporadic AD [2]. Women have a slightly higher risk of AD compared to men [3]. However, the APOE gene explains only a fraction of the genetic risk associated with AD, and it is possible that other genes or metabolic factors may modify the APOE effect to initiate the pathogenesis of AD.~~

The apolipoprotein E gene (APOE) is a genetic factor closely related to late onset AD disease, and constitutes an strong independent risk factor for sporadic AD <sup>2</sup>. However, the APOE gene explains only a fraction of the genetic risk associated with AD, and it is possible that other genes or metabolic factors may modify the APOE effect to initiate the pathogenesis of AD.

In the last years genetic research has focused on identifying common population polymorphism loci, not only APOE, but also other genes such as *CLU*, *CR1*, *PICALM* and *EXOC3L2* have been associated with an increased risk for developing AD [4-7]; <sup>3-6</sup>. ~~These genes are implicated in chaperone action, positive regulation immune response, regulation of receptor-mediated endocytosis.~~ Strikingly, although these genes have a significant effect on the risk of AD, risks differ by more than two orders of magnitude lower than APOE.

Formatted: Font: Calibri

Formatted: Font: Calibri

Formatted: Font: Calibri

Estrogens are pleiotropic hormones having an influence not only on reproductive system but also in central nervous system (CNS). These hormones are synthesized by ovaries and ~~by are also produced in smaller amounts by other tissues such as glia~~ in CNS, having a wide spectrum of effects such as neuroprotective and antiapoptotic [8-10]; <sup>7-9</sup>. Synaptogenic effects of estradiol-17-Beta have been demonstrated in the adult mammalian brain: ~~(rodent and monkey models)~~, low levels of estradiol are correlated with lower synapse density, while high estradiol levels are correlated with a higher density of synapses in the hippocampal region and dendritic spine density in CA1 pyramidal cells [11, 12] <sup>10 11</sup>.

Formatted: Normal

Formatted: Font: Calibri

Formatted: Font: Calibri

Formatted: Font: Calibri

Formatted: Font: Calibri

Among other positive effects of estrogens [13], estradiol-17-Beta has an effect on 1) the maintenance and increase of the neurotransmitter systems, 2) the APP processing, Abeta levels and factors that alter its clearance and aggregation [14], 3) mechanisms of oxidative damage [15]. Low endogenous estrogen levels have been broadly related with the increased risk of Alzheimer's in postmenopausal women. However, despite the initial data, Among other positive effects of estrogens<sup>12</sup>, estradiol-17-Beta has an effect on 1) the maintenance and increase of the neurotransmitter systems, 2) the APP processing, Abeta levels and factors that alter its clearance and aggregation<sup>13</sup>, 3) mechanisms of oxidative damage. Multiple lines of evidence suggest that loss of estrogens in the aging brain of both women and men may play a role in the cognitive declines associated with AD<sup>14</sup> but whether female sex is also a risk factor is controversial although some past and a recent study say show that there is higher rates of cognitive decline for women and apolipoprotein E4 carriers (APOE\*ε4) [16-19]<sup>15-16</sup>, there is disagreement regarding hormonal replacement therapy, and mouse AD-transgenic mice studies generally show great amyloid and neurodegeneration in females [20, 21]<sup>17-18</sup>. However, despite the initial data<sup>19-22</sup>, there is disagreement regarding hormonal replacement therapy in women<sup>14 23-25</sup>.

Furthermore, it has also described an interaction with apolipoprotein E (ApoE). With ApoE, Estradiol increased ApoE levels and neurite outgrowth. ApoE2APOE\*ε2 isoform increased neurite length more than ApoE3APOE\*ε3 isoform in the presence of estradiol-17-Beta. The hormone had no effect on neurite outgrowth from mice lacking the APOE gene or when only ApoE4APOE\*ε4, the isoform that is associated with increased risk of neurological disease, was exogenously supplied [22].<sup>26</sup> These data support the hypothesis that APOE gene plays an integral role in the neurotrophic effects of estradiol-17-Beta, and the presence of a probable synergism between ApoE subtype expression and the effects of estrogens.

The mechanism through which estrogens exert its neuroprotective and anti-neurodegenerative effects in the CNS is poorly understood overall are mediated by two estrogen receptors (ERs), ERalpha and ERbeta (coded by ESR1 and ESR2 genes). ERs are located through around gene, expressed in neurons and glia throughout the brain, especially in hippocampus and amygdala [23, 24]<sup>27-28</sup>, regions involved in memory and learning process. Thus, genetic variants in ER genes have been studied in relation to EA. There are several polymorphic loci in intron 1 of ESR1 gen, highlighting the PvuII and XbaI locus [25]. These loci may influence the expression of ESR1 gen; xp haplotype has higher expression than the XP one, but with no significant differences [26]. Several studies, [27-29] but not all [26] have found an increased frequency of the PvuII and XbaI ESR1 polymorphisms in AD patients.

, regions involved in memory and learning process. Thus, genetic variants in ER genes have been studied in relation to EAD. There are several polymorphic loci in intron 1 of ESR1 gen, highlighting the PvuII and XbaI locus<sup>29</sup>. The polymorphisms of PvuII were coded as P or p and the polymorphisms of XbaI as X or x, in which the capital letter signifies the absence of the restriction site and the lower case letter, signifies its presence. Subjects were described as pp or xx homozygotes, Pp or Xx heterozygotes, or PP or XX homozygotes<sup>30</sup>. The xp haplotype has higher expression than the XP one, but with no significant differences<sup>31</sup>. Several studies,<sup>32-34</sup> but not all<sup>31</sup> have found an increased frequency of the PvuII and XbaI ESR1 polymorphisms in AD patients.

Other interesting SNP is rs2228480, this polymorphism is the coding synonymous variant at codon 594 (rs2228480) within the last exon of the gene ESR1 gen. This variant is thought to play a role in distinguishing between the receptor agonist or antagonists binding to the receptor molecule [30]. In addition, this SNP has been associated with neurodegenerative disorders<sup>35</sup>. In addition, this SNP has been associated with schizophrenia and the mechanism of this association may involve alternative gene regulation and transcript processing [31].<sup>36</sup>

Other studies have shown an association between several polymorphism of ESR2 gene and late onset AD, and they found that variations in this gene could modify disease susceptibility [32].<sup>37</sup> The polymorphism located in 3'UTR of ESR2 gene, rs4986938, has been associated with the onset of Parkinson disease [33]<sup>38</sup> and the susceptibility for vascular dementia (VaD) in an Israeli cohort, but not with AD [34].<sup>39</sup> In the study of Dresener-Pollack et al. (2009), VADVaD is differentiated from AD by clinical criteria, but in the absence of imaging data, the potential for misclassification is high. Thus, results should be confirmed.

Formatted: Font: Calibri

Formatted: Font: Calibri

Formatted: Font: Calibri, English (U.S.)

Formatted: Font: Calibri

To date no studies have been conducted in the prodromal stages of [EAAD](#), such as mild cognitive impairment of amnesic type (MCIa). Such studies could provide information ~~on~~<sup>about</sup> the beginning of the disease process, helping to ensure that suitable therapeutic measures ~~are~~<sup>would be</sup> implemented at an early stage.

Formatted: Font: Calibri

Formatted: Font: Calibri

Formatted: Font: Calibri

According to the above, the aim of the present study was to determine whether the *ESR1* and *ESR2* genes are linked to the risk of MCIa; whether there is an interaction with *APOE* gene; and whether such interaction could influence the risk of AD and MCIa. Our hypothesis is that the association of the *ESR1* and *ESR2* genes with cognitive impairment may exist only in [APOE\\*ε4 status](#) carriers. We have studied this association in AD patients and in MCIa patients, the latter condition possibly representing a prodrome for ~~dementia of AD type~~ [\[35\]](#) AD type dementia.<sup>40</sup>

Formatted: Font: Calibri

Formatted: Font: Calibri

Formatted: Font: Calibri

With the purpose of examining the association of the *ESR1* and *ESR2* genes involved in estrogen metabolism, as a genetic risk factor for cognitive impairment, we conducted a study on a sample of patients with MCIa, AD and a control group. All subjects were analysed for the *ESR1* (rs9340799, rs2234693 and rs2228480) and *ESR2* (rs4986938) polymorphisms and *APOE* genotype.

## METHODS:

Formatted: Font: Calibri

This study comprised 816 caucasian subjects, included in 3 groups: MCIa patients (n=204), AD patients (n=350) and healthy controls (CTL) (n=262). Subjects were prospectively recruited from the Neurology Departments of several hospitals. Participants were aged 50 years and older. For AD and MCIa patients, evaluation also included routine blood tests: haematology, biochemistry, thyroid-stimulating hormone, vitamin B12 levels, syphilis serology and neuroimaging test (CT (Computerized Tomography) scan or MRI) ([Magnetic Resonance Imaging](#)).

Formatted: Font: Calibri

The subjects were evaluated using a broad battery of neuropsychological tests: Minimental State Examination ([MMSE](#)), Clinical Dementia Rating scale, CERAD protocol, Stroop test, unilateral and bilateral motor praxis, 7-minute test, trial making part A and B; and Neuropsychiatric Inventory (NPI).

Formatted: Font: Calibri

Based upon the results of these evaluations, the participants were classified into the following groups: MCIa patients, AD patients and healthy control subjects.

The diagnosis of MCIa patients was based on Petersen's criteria [\[35, 56\]](#).<sup>40</sup> Patients had memory complaints corroborated by an informant, representing a decline from a previous level of functioning given their age and educational level. The score in CDR scale was required to be 0.5, and performance in relation to other cognitive functions and daily living activities were required to be normal. The diagnosis of AD was based on the DSM IV [\[57\]](#) and NINCDS-ADRDA [\[58\]](#) criteria for probable and possible AD. Patients with a total score of less than 3 on CDR scale (mild to moderate dementia) were included.

Formatted: Font: Calibri

Formatted: Font: Calibri

Formatted: Font: Calibri

Healthy control subjects scored within the normal ranges for age and educational level in psychometric testing, with a CDR score of 0.

The exclusion criteria included: severe comorbidities making adequate follow-up unlikely, acute psychiatric diseases, previous cerebrovascular diseases (transient ischemic attacks, stroke or intracranial haemorrhage), other neurodegenerative diseases, and the absence of a reliable informant.

A specific database was designed and declared to the Spanish Data Protection Agency. The study was approved by the Ethics Committee of Cruces Hospital (Barakaldo, Spain). All patients signed informed



consent to undergo the examination. The study was conducted in accordance with the Declaration of Helsinki concerning medical research in human subjects.

#### Genetic analysis:

On the first visit, peripheral blood samples were collected in EDTA vacuum tubes from all individuals. Genomic DNA was extracted by proteolytic lysis from white blood cells using standard phenol/chloroform extraction method.

*APOE* gene was amplified by PCR with the primers 112F and 158R, under the PCR conditions described by Wilton and Lim [59]. 112F and 158R primers, under the PCR conditions described by Wilton and Lim [41]. Digestion of the amplified product was carried out with Hae II and Afl III, as described by Álvarez-Álvarez et al. (2003) [60] (2003) [42].

Three single nucleotide polymorphisms (SNPs) in the *ESR1* gene (rs9340799, rs2234693 and rs2228480) and one SNP in the *ESR2* gene (rs4986938) were evaluated. First two SNPs in *ESR1* (rs9340799 and rs2234693) are in intron 1 and are separated by only 46 base pairs. The rs9340799 polymorphism marks an A→G transition 351 nucleotides upstream in intron 1 (also known as c.454-351A>G). Those with the G allele have an absent XbaI site which has previously been called X in the literature, with the A allele denoted by x. The rs2234693 polymorphism is characterized by a T→C transition 397 nucleotides upstream in the intron (also known as c.454-497T>C) that obliterates the PvuII restriction site. The T allele has previously been called the p allele, while the C allele has been called the P allele, denoting the absence of the PvuII restriction site. Subjects were described as XX, xx, PP, pp, homozygotes; and Xx or Pp heterozygotes.

Taqman SNP Genotyping Assays were used to analyse polymorphism rs2228480; G>A (SNP1) of *ESR1* gene and polymorphism rs4986938; G>A (SNP2) of *ESR2* gene.

SNP genotypes of candidate genes (*ESR1* and *ESR2*) and *APOE* gene were analysed blinded to clinical diagnosis.

The less frequent alleles of each SNP were evaluated such as a combined genotype (XPAA). Therefore with the name of XPAA we are referring all haplotypes with at least one X allele (rs9340799), one P allele (rs2234693), one A allele (rs2228480) and one A allele (rs4986938).

#### Statistical analyses

Genepop version 4.0 was used to test the goodness of the fit to the Hardy-Weinberg equilibrium by means of the Guo-Thompson exact test for all three groups studied [61]. [43]. The G test was also used to check the differences between demographic and clinical variables, allele frequencies and genotype frequencies.

Statistical analysis was also performed using the SPSS® package, version 15.0. A dichotomous variable was used for each polymorphism: "yes" or "no" for "carrier" or "non carrier" of the *APOE*\*ε4 allele and for different alleles and genotypes of the SNPs in candidate genes (*ESR1* and *ESR2* genes).

Several multinomial regression models were created in order to determine the independent effect of X, P and SNP1-A alleles of *ESR1* gene and SNP2-A allele of *ESR2* gene in the total sample and in the absence of *APOE*\*ε4 allele. The effect of *APOE*\*ε4 allele in the total sample and in the different diagnostic groups was also calculated. Another model was created to assess the combined effect of different polymorphism of *ESR1* and *ESR2* genes and the *APOE*\*ε4 allele, based on the hypothesis that the effect of estrogens might exist only in *APOE*\*ε4 allele carriers.

Formatted: Font: Calibri

Formatted: Font: Calibri

Formatted: Font: Calibri, Italic

Formatted: Font: Calibri

Formatted: Font: Calibri

Formatted: Font: Calibri

Formatted: Font: Calibri, Italic

Formatted: Font: Calibri

Formatted: Font: Calibri

Formatted: Font: Calibri

Formatted: Font: Calibri, Superscript

Formatted: Font: Calibri

Formatted: Font: Calibri, Italic

Formatted: Font: Calibri

Because age and gender could be associated with the frequency of some polymorphisms, we adjusted our analysis for these covariates in total sample. P-values of less than 0.05 were considered statistically significant.

**RESULTS:**

We have investigated the independent and combined association of X, P and SNP1-A alleles of *ESR1* gen and SNP2-A allele of *ESR2* gen and APOE\*ε4 allele by using a case-control design.

In the present study we analysed a sample of 204 MCIa patients, 350 AD patients, and 262 healthy control subjects without significant differences in terms of age (p>0.05). There was, however, a significant difference in the MMSE score between groups (p<0.05), (Table 1). Years of education were not significantly different between groups (p=0,148).

**Table 1.** Baseline Demographic

| Group    | n   | Age <sup>a</sup> | Women (%) <sup>b</sup> | MMSE <sup>c</sup> | Education <sup>d</sup> |
|----------|-----|------------------|------------------------|-------------------|------------------------|
| MCIa     | 204 | 70,25 ± 8,6      | 61,3                   | 26.38 ± 2.05      | 8,08 ± 4,36            |
| AD       | 350 | 72,17± 8,3       | 71,1                   | 19.68 ± 4.60      | 8,41 ± 7,90            |
| CONTROLS | 262 | 74,00 ± 9,6      | 59,5                   | 28.45 ± 1.63      | 9,51 ± 4,80            |

<sup>a</sup> Years, mean ± Standard Deviation (S.D.). <sup>b</sup> % of Women in group. <sup>c</sup> MMSE score, mean ± S.D. <sup>d</sup> Years of education

Table 2 shows the allele and genotype frequencies of *ESR1* and *ESR2* polymorphisms and APOE gene in MCIa, AD and controls. In all studied groups, frequencies were in Hardy-Weinberg equilibrium (p>0.05).

**Table 2.** Allelic and genotypic frequency.

| <i>ESR1</i>      |         |       | MCIa (N = 204) | AD (N =350) | CONTROLS (N = 262) |
|------------------|---------|-------|----------------|-------------|--------------------|
| Allele           | XbaI    | X     | 0.426          | 0.409       | 0.395              |
|                  |         | x     | 0.574          | 0.591       | 0.605              |
| Genotype         | PvuII   | XX    | 0.157          | 0.154       | 0.156              |
|                  |         | Xx    | 0.539          | 0.509       | 0.477              |
|                  |         | xx    | 0.304          | 0.337       | 0.366              |
| H-W <sup>a</sup> | p-Value | 0.197 | 0.376          | 1.000       |                    |
| Allele           | PvuII   | P     | 0.488          | 0.480       | 0.462              |
|                  |         | p     | 0.512          | 0.520       | 0.538              |
|                  |         | PP    | 0.225          | 0.209       | 0.214              |

|                        |                |       |       |       |
|------------------------|----------------|-------|-------|-------|
|                        | <b>Pp</b>      | 0.525 | 0.543 | 0.496 |
|                        | <b>pp</b>      | 0.250 | 0.249 | 0.290 |
| <b>H-W<sup>a</sup></b> | <b>p-Value</b> | 0.575 | 0.110 | 1.000 |
| <b>SNP1</b>            |                |       |       |       |
| <b>Allele</b>          | <b>A</b>       | 0.191 | 0.189 | 0.174 |
|                        | <b>G</b>       | 0.809 | 0.811 | 0.826 |
| <b>Genotype</b>        | <b>AA</b>      | 0.039 | 0.037 | 0.030 |
|                        | <b>AG</b>      | 0.304 | 0.303 | 0.286 |
|                        | <b>GG</b>      | 0.657 | 0.660 | 0.684 |
| <b>H-W<sup>a</sup></b> | <b>p-Value</b> | 0.818 | 0.861 | 1.000 |
| <b>ESR2</b>            |                |       |       |       |
| <b>SNP2</b>            |                |       |       |       |
| <b>Allele</b>          | <b>A</b>       | 0.424 | 0.419 | 0.378 |
|                        | <b>G</b>       | 0.576 | 0.581 | 0.622 |
| <b>Genotype</b>        | <b>AA</b>      | 0.201 | 0.189 | 0.133 |
|                        | <b>AG</b>      | 0.446 | 0.460 | 0.489 |
|                        | <b>GG</b>      | 0.353 | 0.351 | 0.378 |
| <b>H-W<sup>a</sup></b> | <b>p-Value</b> | 0.245 | 0.325 | 0.591 |
| <b>APOE</b>            |                |       |       |       |
| <b>Allele</b>          | <b>2</b>       | 0.027 | 0.034 | 0.057 |
|                        | <b>3</b>       | 0.743 | 0.665 | 0.842 |
|                        | <b>4</b>       | 0.230 | 0.301 | 0.101 |
| <b>Genotype</b>        | <b>2,2</b>     | 0.000 | 0.000 | 0.008 |
|                        | <b>2,3</b>     | 0.044 | 0.046 | 0.092 |
|                        | <b>2,4</b>     | 0.010 | 0.017 | 0.008 |
|                        | <b>3,3</b>     | 0.574 | 0.434 | 0.698 |
|                        | <b>3,4</b>     | 0.294 | 0.420 | 0.195 |
|                        | <b>4,4</b>     | 0.078 | 0.083 | 0.000 |
| <b>H-W<sup>a</sup></b> | <b>p-Value</b> | 0.217 | 0.814 | 0.102 |
| <b>Genetic Profile</b> |                |       |       |       |
|                        | <b>XPAA(+)</b> | 0.709 | 0.708 | 0.674 |

XPAA(-) 0.291 0.292 0.326

<sup>a</sup> Hardy-Weinberg probability test.

There were no significant differences in allele and genotype frequencies in MCIa and AD compared to controls for *ESR1* and *ESR2* gene polymorphisms, while the differences proved significant for *APOE* gene (Table 3).

**Table 3.** Exact G test

| XbaI <sup>a</sup>  |         |                   | XbaI <sup>b</sup>  |         |                   |
|--------------------|---------|-------------------|--------------------|---------|-------------------|
|                    | P-value | S.E. <sup>c</sup> |                    | P-value | S.E. <sup>c</sup> |
| MCI vs CTL         | 0.339   | 0.006             | MCI vs CTL         | 0.336   | 0.004             |
| MCI vs AD          | 0.571   | 0.005             | MCI vs AD          | 0.564   | 0.004             |
| AD vs CTL          | 0.638   | 0.005             | AD vs CTL          | 0.635   | 0.004             |
| PvuII <sup>a</sup> |         |                   | PvuII <sup>b</sup> |         |                   |
|                    | P-value | S.E. <sup>c</sup> |                    | P-value | S.E. <sup>c</sup> |
| MCI vs CTL         | 0.479   | 0.006             | MCI vs CTL         | 0.464   | 0.004             |
| MCI vs AD          | 0.853   | 0.002             | MCI vs AD          | 0.846   | 0.002             |
| AD vs CTL          | 0.562   | 0.006             | AD vs CTL          | 0.548   | 0.005             |
| SNP1 <sup>a</sup>  |         |                   | SNP1 <sup>b</sup>  |         |                   |
|                    | P-value | S.E. <sup>c</sup> |                    | P-value | S.E. <sup>c</sup> |
| MCI vs CTL         | 0.483   | 0.005             | MCI vs CTL         | 0.491   | 0.004             |
| MCI vs AD          | 0.935   | 0.002             | MCI vs AD          | 0.935   | 0.001             |
| AD vs CTL          | 0.532   | 0.011             | AD vs CTL          | 0.552   | 0.007             |
| SNP2 <sup>a</sup>  |         |                   | SNP2 <sup>b</sup>  |         |                   |
|                    | P-value | S.E. <sup>c</sup> |                    | P-value | S.E. <sup>c</sup> |
| MCI vs CTL         | 0.180   | 0.009             | MCI vs CTL         | 0.153   | 0.005             |
| MCI vs AD          | 0.896   | 0.003             | MCI vs AD          | 0.904   | 0.003             |
| AD vs CTL          | 0.139   | 0.007             | AD vs CTL          | 0.173   | 0.009             |
| APOE <sup>a</sup>  |         |                   | APOE <sup>b</sup>  |         |                   |
|                    | P-value | S.E. <sup>c</sup> |                    | P-value | S.E. <sup>c</sup> |

Formatted: Font: Calibri, 8 pt

Formatted: Font: Calibri

Formatted: Font: Calibri, Italic

Formatted: Font: Calibri

Formatted: Font: Calibri, Italic

Formatted: Font: Calibri

Formatted: Font: Calibri, Italic

Formatted: Font: Calibri

Formatted Table

|                   |       |        |                   |       |        |
|-------------------|-------|--------|-------------------|-------|--------|
| <b>MCI vs CTL</b> | 0.000 | <0.001 | <b>MCI vs CTL</b> | 0.000 | <0.001 |
| <b>MCI vs AD</b>  | 0.033 | 0.002  | <b>MCI vs AD</b>  | 0.033 | 0.002  |
| <b>AD vs CTL</b>  | 0.000 | <0.001 | <b>AD vs CTL</b>  | 0.000 | <0.001 |

*a Allelic frequency. b Genotypic frequency. c Standard Error*

In order to determine whether the less represented alleles of SNPs in candidate genes (*ESR1* and *ESR2* genes) were an independent risk factor for MCIa and AD, we selected a subgroup of MCIa, AD and control individuals with the presence of at least one of these alleles. None of them had a significant effect (data not shown).

In the total sample, APOE\*ε4 allele is a risk factor for cognitive impairment; the odds ratios (ORs) of developing MCIa and AD were 2.44 (95%CI 1.61-3.69, p<0.001) and 4.23 (95%CI 2.93-6.12, p<0.001), respectively (Table 4). The higher risk conferred by APOE\*ε4 allele was observed even when the samples were subgrouped by sex, but in AD women the risk was higher than in men, 4.85 (95%CI 3.04-7.73, p<0.001) versus 3.19 (95%CI 1.73-5.88, p<0.001).

**Table 4.** Risk Factors for MCI and AD from Logistic Regression Models

| Global Effects               | MCI              |        | AD                |        |
|------------------------------|------------------|--------|-------------------|--------|
|                              | OR CI95%         | p      | OR CI95%          | p      |
| X (+) <sup>a</sup>           | 1.39 (0.93-2.06) | 0.104  | 1.18 (0.85-1.67)  | 0.324  |
| P (+) <sup>b</sup>           | 1.25 (0.82-1.90) | 0.293  | 1.26 (0.88-1.23)  | 0.205  |
| SNP1-A <sup>c</sup>          | 1.14 (0.76-1.71) | 0.506  | 1.13 (0.78-1.62)  | 0.510  |
| SNP2-A <sup>d</sup>          | 1.05 (0.71-1.54) | 0.304  | 1.08 (0.77-1.51)  | 0.649  |
| E4 (+) <sup>e</sup>          | 2.44 (1.61-3.69) | <0.001 | 4.23 (2.93-6.12)  | <0.001 |
| Women                        | 1.07 (0.73-1.56) | 0.705  | 1.67 (1.19-2.35)  | 0.003  |
| E4 (+)*Women <sup>f</sup>    | 2.27 (1.32-3.87) | 0.003  | 4.85 (3.04-7.73)  | <0.001 |
| E4 (+)*Men <sup>g</sup>      | 2.74 (1.43-5.23) | 0.002  | 3.19 (1.73-5.88)  | <0.001 |
| <b>Independent Effects</b>   |                  |        |                   |        |
| X (+) E4(-) <sup>h</sup>     | 1.04 (0.65-1.66) | 0.863  | 1.18 (0.76-1.81)  | 0.452  |
| P (+) E4(-) <sup>h</sup>     | 0.86 (0.52-1.40) | 0.545  | 1.19 (0.754-1.90) | 0.444  |
| SNP1-A(+)*E4(-) <sup>h</sup> | 1.19 (0.74-1.92) | 0.469  | 1.13 (0.73-1.76)  | 0.568  |
| SNP2-A(+)*E4(-) <sup>h</sup> | 1.03 (0.65-1.66) | 0.879  | 1.07 (0.70-1.64)  | 0.758  |
| <b>ESR1</b>                  |                  |        |                   |        |
| <b>Combined Effects</b>      |                  |        |                   |        |
| E4(+)*X <sup>i</sup>         | 3.17 (1.80-5.59) | <0.001 | 5.07 (3.00-8.55)  | <0.001 |
| E4(+)*P <sup>j</sup>         | 2.74 (1.55-4.85) | 0.001  | 5.35 (3.11-9.17)  | <0.001 |

Formatted: Font: 8 pt

Formatted: Font: Calibri

Formatted: Font: Calibri, Italic

Formatted: Font: Calibri

Formatted: Font: Calibri, Italic

Formatted: Font: Calibri

Formatted Table

Formatted Table

E4(+)\*SNP1-A<sup>i</sup> 2.53 (1.31-4.90) <0.001 4.44 (2.48-7.93) <0.001

**ESR2**

**Combined Effects**

E4(+)\*SNP2-A<sup>l</sup> 2.77 (1.55-4.93) 0.001 4.87 (2.91-8.17) <0.001

**Genetic Profile  
(XPAA)**

**Independent Effects**

XPAA\*E4(-)<sup>j</sup> 1.31 (0.48-3.54) 0.590 1.19 (0.49-2.91) 0.696

XPAA(-)\*E4(+)<sup>k</sup> 2.53 (1.61-3.93) <0.001 4.32 (2.91-6.40) <0.001

**Combined Effects**

XPAA\*E4(+)<sup>l</sup> 3.30 (1.28-8.54) 0.014 5.16 (2.19-12.14) <0.001

XPAA\*E4(+)\*Women<sup>m</sup> 3.84 (1.09-13.57) 0.036 8.04 (2.60-24.80) <0.001

XPAA\*E4(+)\*Men<sup>m</sup> 3.20 (0.73-14.11) 0.124 3.57 (0.88-14.47) 0.075

<sup>a</sup>Effect of sample with at least one X of RFLP XbaI. <sup>b</sup>Effect of sample with at least one P of RFLP PvuII.  
<sup>c</sup> Effect of sample with at least one A allele of rs2228480. <sup>d</sup> Effect of sample with at least one A allele of rs4986938. <sup>e</sup> Effect of sample with at least one E4 allele of APOE gene. <sup>f</sup> Women selected by at least one E4 allele of APOE gene. <sup>g</sup> Men selected by at least one E4 allele of APOE gene. <sup>h</sup> Sample selected by at least one allele that is indicated and the absence of E4 allele of APOE gene. <sup>i</sup> Sample selected by at least one E4 allele of APOE gene and one of the alleles that is indicated. Reference category was sample control. <sup>j</sup> Sample selected by absence of E4 allele of APOE gene and the presence of XPAA. <sup>k</sup> Sample selected by absence of XPAA and the presence by at least one E4 allele of APOE gene. Sample selected by at least one E4 allele of APOE gene and the presence XPAA. <sup>l</sup> Sample selected by at least one E4 allele of APOE gene and the presence of XPAA. <sup>m</sup> Women or Men selected by at least one E4 allele of APOE gene and the presence of XPAA. \* In all models reference category was sample control considering the age and sex (as appropriate).  
<sup>n</sup> Sample selected by at least one X of RFLP XbaI. <sup>o</sup> Sample selected by at least one P of RFLP PvuII. <sup>p</sup> Sample selected by at least one A allele of rs2228480. <sup>q</sup> Sample selected by at least one A allele of rs4986938. <sup>r</sup> Sample selected by at least one E4 allele of APOE gene. <sup>s</sup> Women selected by at least one E4 allele of APOE gene. <sup>t</sup> Men selected by at least one E4 allele of APOE gene. <sup>u</sup> Sample selected by at least one allele that is indicated and the absence of E4 allele of APOE gene. <sup>v</sup> Sample selected by at least one E4 allele of APOE gene and one of the alleles that is indicated. Reference category was sample control. <sup>w</sup> Sample selected by absence of E4 allele of APOE gene and the presence of XPAA. <sup>x</sup> Sample selected by absence of XPAA and the presence by at least one E4 allele of APOE gene. Sample selected by at least one E4 allele of APOE gene and the presence XPAA. <sup>y</sup> Sample selected by at least one E4 allele of APOE gene and the presence of XPAA. <sup>z</sup> Women or Men selected by at least one E4 allele of APOE gene and the presence of XPAA. \* In all models reference category was sample control

Aiming to avoid the combined effect of the less represented alleles of SNPs in candidates genes and APOE\*ε4 allele, we analysed the risk of MCIa and AD according to the presence of X, P, SNP1-A and SNP2-A alleles and the absence of one APOE\*ε4 allele. We did not found a significant effect, even when the samples were subgrouped by sex (data not shown).

Formatted Table

Formatted Table

Formatted: Font: Calibri, 8 pt

Formatted: 08 Article Text, Left, Right: 0", Adjust space between Latin and Asian text, Adjust space between Asian text and numbers

Formatted Table

Formatted: 08 Article Text, Left, Line spacing: single

Formatted: Font: Times New Roman, 8 pt, Not Bold

Formatted: Font: Calibri, Italic, Font color: Black

Formatted: Normal, Right: 0.03", Don't adjust space between Latin and Asian text, Don't adjust space between Asian text and

Formatted: Font: Calibri

We further evaluated a possible synergistic effect between the less represented alleles of SNP in candidates genes and APOE\*ε4 allele by using a multivariate logistic regression model. To analyse this effect, we subgrouped the subjects according to the presence of X, P, SNP1-A and SNP2-A alleles and at least one APOE\*ε4 allele. A slight increase in nominal risk of MCI and AD was observed. [The statistical analyzes were also conducted according to the gender \(Supplementary table 1\)](#)

**Supplementary Table 1:** Risk factors for combined effects in MCI and AD from Logistic Regression Models

| <u>ESR1</u>                         | <u>MCI</u>               |              | <u>AD</u>                |                  |
|-------------------------------------|--------------------------|--------------|--------------------------|------------------|
| <u>Combined Effects</u>             | <u>OR CI95%</u>          | <u>p</u>     | <u>OR CI95%</u>          | <u>p</u>         |
| <u>E4 (+)*X*Women<sup>a1</sup></u>  | <u>4.32 (1.80-10.39)</u> | <u>0.001</u> | <u>7.46 (3.46-16.10)</u> | <u>&lt;0.001</u> |
| <u>E4 (+)*X*Men<sup>a2</sup></u>    | <u>5.02 (1.95-12.89)</u> | <u>0.001</u> | <u>3.84 (1.60-9.21)</u>  | <u>0.003</u>     |
| <u>E4 (+)*P*Women<sup>b1</sup></u>  | <u>3.62 (1.51-8.67)</u>  | <u>0.004</u> | <u>9.71 (4.20-22.43)</u> | <u>&lt;0.001</u> |
| <u>E4 (+)*P*Men<sup>b2</sup></u>    | <u>3.87 (1.52-9.82)</u>  | <u>0.004</u> | <u>4.67 (1.86-11.71)</u> | <u>0.004</u>     |
| <u>E4 (+)*A*Women<sup>c1</sup></u>  | <u>1.51 (0.93-3.63)</u>  | <u>0.348</u> | <u>4.45 (2.18-9.08)</u>  | <u>&lt;0.001</u> |
| <u>E4 (+)*A*Men<sup>c2</sup></u>    | <u>5.05 (1.77-14.42)</u> | <u>0.002</u> | <u>3.87 (1.39-10.76)</u> | <u>0.010</u>     |
| <u>ESR-2</u>                        |                          |              |                          |                  |
| <u>Combined Effects</u>             |                          |              |                          |                  |
| <u>E4 (+)*A* Women<sup>d1</sup></u> | <u>2.14 (1.03-4.49)</u>  | <u>0.041</u> | <u>4.71 (2.49-8.90)</u>  | <u>0.001</u>     |
| <u>E4 (+)*A* Men<sup>d2</sup></u>   | <u>4.20 (1.62-10.87)</u> | <u>0.003</u> | <u>4.74 (1.94-11.56)</u> | <u>0.001</u>     |

<sup>a1</sup> Women selected by at least one E4 allele of APOE gene and at least on X allele of Xbal. Reference category was sample control. <sup>a2</sup> Men selected by at least one E4 of APOE gene and at least one X allele of Xbal. Reference category was sample control. <sup>b1</sup> Women selected by at least one E4 allele of APOE gene an at least one P allele of P vull. Reference category was sample control. <sup>b2</sup> Men selected by at least one E4 an APOE gene and at least one P allele of P vull. Reference category was sample control. <sup>c1</sup> Women selected by at least one E4 allele of APOE an at least one A allele of rs2228480. Reference category was sample control. <sup>c2</sup> Men selected by at least one E4 allele of APOE an at least: One A allele of rs2228480. Reference category was sample control. <sup>d1</sup> Women selected by at least one E4 allele of APOE an at least one A allele of rs4986938. Reference category was sample control. <sup>d2</sup> Men selected by at least one EA allele of APOE and at least one A allele of rs4986938. Reference category was sample control.

A significant increased OR was found between the X, P, SNP1-A and SNP2-A alleles tested and MCI men, but it has not been clear observed in women. The opposite effect was observed in the AD group, women showed a greater OR than men. Supplementary table 2 shows the size of samples that carry the genetic characteristic considered in the input of combined models in all groups. Overall, significant differences between the control frequencies and patient's frequencies provided enough power to address this question for a minimum detectable OR between 2.0 and 5.

**Supplementary table 2.** Samples size for each group considered in combined calculations.

| <u>Alleles</u> | <u>MCI (N=204)</u> |                |                |                | <u>AD (N=350)</u> |               |                |                | <u>CTL (N=262)</u> |               |                |                |
|----------------|--------------------|----------------|----------------|----------------|-------------------|---------------|----------------|----------------|--------------------|---------------|----------------|----------------|
|                | <u>E4(+)</u>       |                | <u>E4(-)</u>   |                | <u>E4(+)</u>      |               | <u>E4(-)</u>   |                | <u>E4(+)</u>       |               | <u>E4(-)</u>   |                |
|                | <u>Women</u>       | <u>Men</u>     | <u>Women</u>   | <u>Men</u>     | <u>Women</u>      | <u>Men</u>    | <u>Women</u>   | <u>Men</u>     | <u>Women</u>       | <u>Men</u>    | <u>Women</u>   | <u>Men</u>     |
| <u>X(+)</u>    | <u>34</u>          | <u>27</u>      | <u>47</u>      | <u>34</u>      | <u>88</u>         | <u>31</u>     | <u>76</u>      | <u>37</u>      | <u>19</u>          | <u>13</u>     | <u>79</u>      | <u>55</u>      |
|                | <u>(16.67)</u>     | <u>(13.24)</u> | <u>(23.04)</u> | <u>(16.67)</u> | <u>(25.14)</u>    | <u>(8.86)</u> | <u>(21.71)</u> | <u>(10.57)</u> | <u>(7.25)</u>      | <u>(4.96)</u> | <u>(30.15)</u> | <u>(20.99)</u> |

|                    |         |               |               |               |               |                |               |               |               |              |              |                |               |
|--------------------|---------|---------------|---------------|---------------|---------------|----------------|---------------|---------------|---------------|--------------|--------------|----------------|---------------|
| Pvull              | X(-)    | 11<br>(5.39)  | 6<br>(2.94)   | 33<br>(16.18) | 12<br>(5.88)  | 48<br>(13.71)  | 15<br>(4.29)  | 37<br>(10.57) | 18<br>(5.14)  | 12<br>(4.58) | 9<br>(3.44)  | 46<br>(17.56)  | 29<br>(11.07) |
|                    | P(+)    | 38<br>(18.63) | 29<br>(14.22) | 52<br>(25.49) | 34<br>(16.67) | 102<br>(29.14) | 35<br>(10.00) | 83<br>(23.71) | 43<br>(12.29) | 21<br>(8.02) | 15<br>(5.73) | 90<br>(34.35)  | 60<br>(22.90) |
|                    | P(-)    | 7<br>(3.43)   | 4<br>(1.96)   | 28<br>(13.73) | 12<br>(5.88)  | 34<br>(9.71)   | 11<br>(3.14)  | 30<br>(8.57)  | 12<br>(3.43)  | 10<br>(3.82) | 7<br>(2.67)  | 35<br>(13.36)  | 24<br>(9.16)  |
| ESR1<br>SNP1       | A(+)    | 12<br>(5.88)  | 14<br>(6.86)  | 28<br>(13.73) | 16<br>(7.84)  | 46<br>(13.14)  | 15<br>(4.29)  | 45<br>(12.86) | 13<br>(3.71)  | 12<br>(4.58) | 6<br>(2.29)  | 46<br>(17.56)  | 19<br>(7.25)  |
|                    | A(-)    | 33<br>(16.18) | 19<br>(9.31)  | 52<br>(25.49) | 30<br>(14.71) | 90<br>(25.71)  | 31<br>(8.86)  | 68<br>(19.43) | 42<br>(12.00) | 19<br>(7.25) | 16<br>(6.11) | 79<br>(30.15)  | 65<br>(24.81) |
| ESR2<br>SNP2       | A(+)    | 29<br>(14.22) | 21<br>(10.29) | 51<br>(25.00) | 31<br>(15.20) | 88<br>(25.14)  | 30<br>(8.57)  | 73<br>(20.86) | 36<br>(10.29) | 21<br>(8.02) | 11<br>(4.20) | 80<br>(30.53)  | 51<br>(19.47) |
|                    | A(-)    | 16<br>(7.84)  | 12<br>(5.88)  | 29<br>(14.22) | 15<br>(7.35)  | 48<br>(13.71)  | 16<br>(4.57)  | 40<br>(11.43) | 19<br>(5.43)  | 10<br>(3.82) | 11<br>(4.20) | 45<br>(17.18)  | 33<br>(12.60) |
| Genetic<br>profile | XPAA(+) | 8<br>(2.29)   | 5<br>(1.43)   | 14<br>(4.00)  | 7<br>(2.00)   | 21<br>(6.00)   | 7<br>(2.00)   | 17<br>(4.86)  | 6<br>(1.71)   | 4<br>(1.14)  | 3<br>(0.86)  | 13<br>(3.71)   | 9<br>(2.57)   |
|                    | XPAA(-) | 37<br>(10.57) | 28<br>(8.00)  | 66<br>(18.86) | 39<br>(11.14) | 115<br>(32.86) | 39<br>(11.14) | 96<br>(27.43) | 49<br>(14.00) | 27<br>(7.71) | 19<br>(5.43) | 112<br>(32.00) | 75<br>(21.43) |

The percentages are calculated over the total size of each group. (+) presence of the allele, (-) Absence of the allele.

In order to analyse the combined effect between estrogen polymorphisms, we created a genetic profile with the less represented alleles of these SNPs, expressed as XPAA. We did not found a significant risk in the absence of one APOE\*ε4 allele, but analysing the combined effect of XPAA with APOE\*ε4 allele, ORs were as follows: the following: MCIa, OR= 3.30 (95%CI 1.28-8.54, p=0.014) and AD, OR= 5.16 (95%CI 2.19-12.14, p<0.001), these ORs were even greater than the independent effect of APOE\*ε4 allele with XPAA(-) (absence of this genetic profile). However, although it was expected to obtain a greater effect in MCI men and AD women, according to the results showed in table 3, when the samples were subgrouped by sex taking into account the genetic profile, MCIa and AD women showed an increased OR, 3.84 (95%CI 1.09-13.57, p<0.036) and 8.04 (95%CI 2.60-24.80, p<0.001) respectively, comparing with men (table 4).

## DISCUSSION

Our study shows that neither alleles nor genotypes of SNPs rs9340799 (A>G; XbaI), rs2234693 (PvuII; C>T) and rs2228480 (A>G) (ESR1 gene) and SNP rs4986938 (A>G) (ESR2 gene) are independently associated with the risk of MCIa or AD. The less represented alleles of SNPs in candidate genes (ESR1 and ESR2 genes) were not an independent risk factor for MCIa and AD in absence of APOE\*ε4. Furthermore, the genetic profile created with the less represented alleles of SNPs in candidate genes were associated with an increased risk for MCIa and AD in women APOE\*ε4 allele carriers.

In our series, APOE\*ε4 allele seems to be an independent risk factor for the AD population, and this risk is highest for women. The APOE\*ε4 allele also constitutes a risk factor for MCIa patients.

On evaluating the combined effect of the APOE\*ε4 allele in the presence of alleles or genotypes of ESR1 and ESR2 SNPs the risk for AD remains significant; though this association did not confer a relevant additional risk of MCIa and AD.

When we created a genetic profile with the less represented alleles of ESR1 and ESR2 SNPs, expressed as XPAA, we did not found a significant risk in the absence of one APOE\*ε4 allele. However, the presence of XPAA and at least one APOE\*ε4 allele increases the risk in MCIa and AD women.

Nowadays the most well-known polymorphism of ESR1 gene related with AD are SNPs rs9340799 (A>G; XbaI) and rs2234693 (PvuII; T>C). Regarding to the association between XbaI with AD, several studies show that ESR1 XbaI polymorphism is an additional risk factor [27, 36-38]. However, other

Formatted: Font: Calibri, Highlight

Formatted: Font: Calibri

Formatted: Tab stops: 2.18", Left

Formatted: Font: Calibri, Italic

Formatted: Font: Calibri



studies have not found this association [29, 39, 42]<sup>34, 47-50</sup>. These results and several meta-analysis [1, 43]<sup>51</sup> suggested that *ESR1* gene polymorphisms might be related to the individual susceptibility to AD, especially in the females.

Concerning to the association between *ESR1* PvuII polymorphism with AD, several published studies have shown a great heterogeneity. In some of them no association has been found [26, 39, 40, 42, 44]<sup>31, 47, 48, 50, 52</sup>. Other studies claimed a protective role of P allele of *ESR1* PvuII polymorphism [29, 37, 38]<sup>34, 45, 46</sup>, whereas others found an opposite effect [27, 28, 36, 45, 47]<sup>32, 33, 44, 53, 55</sup>. Some studies [36]. Some studies<sup>44</sup> have established an association between *ESR1* PP and XX genotypes with an increased risk for AD only in males (OR = 3.6, 95% CI = 1.2-10.9) and conferred a relevant additional risk of AD to subjects also carrying APOE\*ε4 allele, and in AD women. In this last study *ESR1* PP and XX genotypes were also associated with lower MMSE values (p = 0.0007). This data suggests that the involvement of *ESR1* polymorphisms (XbaI and PvuII) in AD onset is mediated by the regulation of *APOE* expression. Our data support this hypothesis, in accordance with the increased risk of MCI and AD observed in patients with APOE\*ε4 allele.

In our knowledge, this is the first study to show evidences in support of the association of SNP rs2228480 with MCI and AD patients APOE\*ε4 allele carriers. Previously, this SNP only has been linked to the alternative regulation and transcript processing of *ESR1* gene [31, 48]<sup>36, 56</sup>. To date had have not been provided other information in relation to neurodegenerative disorders.

Regarding polymorphisms of *ESR2* gen, several studies have been published with conflicting results: susceptibility for vascular dementia (VaD) but not for sporadic AD in elderly Jewish women was found in *ESR2* rs4986938 polymorphism [34]. Pirskanen et al. (2005)[32] found that some gene variants of *ESR2* gen are associated with increased risk of AD in women (rs1271573 T/T genotype and rs1256043 T/T genotype) while others not (IVS31842, rs4986938). Lambert et al. (2001) [40] found no independent association of these polymorphisms with the risk of developing AD. One study suggests the *ESR2* allele 5 seems to be a protective factor [49]. Meta-analyses have not been performed on the following polymorphisms of *ESR2* gen since they lack published genotype data or the published genotype data was not eligible for inclusion. Other studies [50] have not detected a significant gene-gene interaction between *ESR1*, *ESR2* SNPs and APOE status but the analysis was performed in late onset AD.

Regarding polymorphisms of *ESR2* gen, several studies have been published with conflicting results: susceptibility for vascular dementia (VaD) but not for sporadic AD in elderly Jewish women was found in *ESR2* rs4986938 polymorphism<sup>39</sup>. Pirskanen et al. (2005)<sup>37</sup> found that some gene variants of *ESR2* gen are associated with increased risk of AD in women (rs1271573 T/T genotype and rs1256043 T/T genotype) while others not (IVS31842, rs4986938). Lambert et al. (2001)<sup>48</sup> found no independent association of these polymorphisms with the risk of developing AD. One study suggests the *ESR2* allele 5 seems to be a protective factor<sup>57</sup>. Meta-analyses have not been performed on the following polymorphisms of *ESR2* gen since they lack published genotype data or the published genotype data was not eligible for inclusion. Other studies<sup>58</sup> have not detected a significant gene-gene interaction between *ESR1*, *ESR2* SNPs and APOE status but the analysis was performed in late onset AD.

In contrast with previous studies we have analysed the genetic profile of the less represented alleles of *ESR1* and *ESR2* gene polymorphisms, XPAA; when considering the XPAA isolatedly, the genetic profile was not an independent risk factor for MCI and AD, but the combined effect with APOE\*ε4 allele confers an increased risk in women, whereas it does not contribute to the disease susceptibility in men. According Analysis of haplotypes offers more power to detect associations than does simply focusing on a single variant, but in our case the expected results differ slightly from those expected. The combined effect observed between X, P, SNP1-A and SNP2-A alleles and at least one APOE\*ε4 allele seemed to point to an increased risk in MCI men and AD women. Our case-control study is relative medium size there are a small number samples carrying the genetic profile (<8% in MCI and AD patients, and <2% in controls) and APOE\*ε4 allele that may affects negatively the power. Nevertheless, according to our results, some variations in the ER genes in synergy with APOE\*ε4 allele may be associated with an increased risk of MCI and AD in women.

Formatted: Font: Calibri

Our results may suggest that the risk for MCIa and AD may be modulated only when both *ESR1* and *ESR2* genes have several polymorphisms, which might be related to their expression and biological activities. The variations in the ERs genes may involve alternative gene regulation and transcript processing in the brain [31].<sup>36A</sup> *APOE* gene expression can be differentially regulated depending on activation of ER subtypes. A recent study [15] A recent study<sup>59</sup> demonstrated that activation of *ESR1* gene up-regulated *APOE\*ε4* mRNA and protein expression in hippocampus. In contrast, activation of *ESR2* gene down-regulated the mRNA and protein expression of *APOE gene*. Thus, it is expected lower regulation in postmenopausal women [51].<sup>60A</sup> conferring less protection against the effect of *APOE\*ε4* allele.

Estrogens have been shown to affect amyloid precursor protein metabolism, by increasing the secretory metabolism of amyloid protein precursor (*APP*). Estrogens are also a potent factor that not only prevents vascular disease but also improves blood flow, including blood flow in regions on the brain affected by AD [52]. Synaptic sprouting by estradiol in a model of AD may operate via an *APOE\*ε4* dependent mechanism [53]. Cholinergic neurons that are implicated in cognitive functions may be regulated by estrogens. The distribution of ERs corresponds to that of cholinergic system [54]. The important decrease in endogenous estrogen levels after menopause may contribute to the development of AD [55]. Despite the protective effect of estrogens upon AD, this effect might be modified by ERs polymorphisms, particularly in *APOE\*ε4* allele carriers. Thus, the current state of knowledge of the role of estrogens for preventing dementia in postmenopausal women should be reviewed.

Relatively few studies have examined the epistatic effects between estrogen-related pathway genes and *APOE\*ε4* allele. Postmenopausal women with down syndrome showed an increased risk of AD and elevated sex hormone binding globulin in those carrying *CYP17* and *CYP19* variants and *APOE\*ε4* allele<sup>61</sup>. Both genes are involved in the production of neurosteroids (estrogens and testosterone). In addition, estrogens have been shown to affect amyloid precursor protein metabolism, by increasing the secretory metabolism of amyloid protein precursor (*APP*). Estrogens are also a potent factor that not only prevents vascular disease but also improves blood flow, including blood flow in regions on the brain affected by AD<sup>62</sup>. Synaptic sprouting by estradiol in a model of AD may operate via an *APOE\*ε4*-dependent mechanism<sup>63</sup>. Cholinergic neurons that are implicated in cognitive functions may be regulated by estrogens. The distribution of ERs corresponds to that of cholinergic system<sup>64</sup>. The important decrease in endogenous estrogen levels after menopause may contribute to the development of AD<sup>65</sup>. Despite the protective effect of estrogens upon AD, this effect might be modified by ERs polymorphisms, particularly in *APOE\*ε4* allele carriers. Thus, the current state of knowledge of the role of estrogens for preventing dementia in postmenopausal women should be reviewed.

Although the prevalence and incidence of AD are higher in women, men also may have the same effect due to SNPs in ER genes. It has been observed that while androgens have specific receptors to exert its neuroprotective action, they also ~~they may exert~~ also exert their actions indirectly via *CYP17* by aromatization of testosterone to estradiol<sup>66</sup> or directly through *ESR2* binding capacity ~~of~~ of the metabolite dihydrotestosterone<sup>67</sup>. To date, it is unclear whether SNPs in ER genes would increase the risk of AD or MCIa in men. Our partial data trend to increase the risk of MCIa in men, ~~although the data seems to indicate otherwise~~. Future studies should elucidate whether there is a relationship between ER genes and MCIa in men.

The strengths of our study are its multicenter nature including AD patients, healthy controls, and MCIa patients. In our knowledge, ours is the first study to investigate ~~and an~~ association between polymorphisms of ER (rs9340799, rs2234693, rs2228480 and rs4986938) and cognitive function not only in AD patients, but also in MCIa. Moreover, the patient sample is not small, allowing gender stratification.

Some limitations ~~to in~~ our study must be addressed. The study population comes from the hospital setting. A community-based study could provide more information. The serum levels of estradiol have not been measured, and we do not know whether the patients received ERT in the last years. We also include a sample of patients with MCIa, this stage is probably a heterogeneous clinical entity. But, the broad battery of neuropsychological test used in our sample might ensure a highest homogeneity.

Formatted: Font: Calibri

## CONCLUSIONS

In our study, APOE\*ε4 allele is an independent risk factor for MCIa and AD patients. The combined effect of the APOE\*ε4 allele and the less represented alleles of *ESR1* and *ESR2* SNPs remains the risk for MCIa and AD; ~~although this association does not confers~~ a relevant additional risk of AD and MCIa. ~~Furthermore, in women and men respectively. Nevertheless,~~ the genetic profile with the less represented alleles of *ESR1* and *ESR2* gene polymorphisms, expressed as XPAA, did not increase the risk of cognitive impairment in the absence of one APOE\*ε4 allele, but the presence of XPAA and at least one APOE\*ε4 allele ~~only~~ increases the risk in MCIa and AD women.

Formatted: Font: Calibri

Formatted: Font: Calibri, 10 pt, Not Bold

Formatted: Font: Calibri

## OTHER INFORMATION:

Formatted: Font: Calibri, 10 pt, Not Highlight

Formatted: Font: Calibri, English (U.S.)

### Competing interests:

None.

### Funding:

This work was sponsored by grants from the Federación de Asociaciones de Familiares de enfermos de Alzheimer de Euskadi, Fondo de Investigación Sanitaria del Instituto Carlos III (Madrid), Pfizer Foundation and Ayudas a la Investigación de la Obra Social de la Caja Vital Kutxa.

Formatted: Font: Calibri

Formatted: Font: Calibri, 10 pt, Not Bold

Formatted: Font: Calibri

## REFERENCES

- [1] Bertram L, McQueen MB, Mullin K, Blacker D, Tanzi RE. Systematic meta-analyses of Alzheimer disease genetic association studies: the AlzGene database. *Nat Genet* 2007;39:(1):17-23 (2007).
- [2] Saunders AM, Strittmatter WJ, Schmechel D, George-Hyslop PH, Pericak-Vance MA, Joo SH, et al. Association of apolipoprotein E allele epsilon 4 with late-onset familial and sporadic Alzheimer's disease. *Neurology* 1993;43:(8):1467-72 (1993).
- [3] Farrer LA, Cupples LA, Haines JL, Hyman B, Kukull WA, Mayeux R, et al. Effects of age, sex, and ethnicity on the association between apolipoprotein E genotype and Alzheimer disease. A meta-analysis. APOE and Alzheimer Disease Meta Analysis Consortium. *JAMA* 278: 1349-56 (1997).
- [4] Carrasquillo MM, Belbin O, Hunter TA, Ma L, Bisceglia GD, Zou F, et al. Replication of CLU, CR1, and PICALM associations with Alzheimer disease. *Arch Neurol* 67:(8):961-4.
- [5] Harold D, Abraham R, Hollingworth P, Sims R, Gerrish A, Hamshere ML, et al. Genome-wide association study identifies variants at CLU and PICALM associated with Alzheimer's disease. *Nat Genet* 2009;41:(10):1088-93 (2009).
- [6] Lambert JC, Heath S, Even G, Campion D, Sleegers K, Hiltunen M, et al. Genome-wide association study identifies variants at CLU and CR1 associated with Alzheimer's disease. *Nat Genet* 2009;41:(10):1094-9 (2009).
- [7] Seshadri S, Fitzpatrick AL, Ikram MA, DeStefano AL, Gudnason V, Boada M, et al. Genome-wide analysis of genetic loci associated with Alzheimer disease. *JAMA* 303: 1832-40 (2010).
- [8] Seshadri S, Fitzpatrick AL, Ikram MA, DeStefano AL, Gudnason V, Boada M, et al. Genome-wide analysis of genetic loci associated with Alzheimer disease. *JAMA* 2010 ;303(18):1832-40.
- [9] Garcia-Segura LM, McCarthy MM. Minireview: Role of glia in neuroendocrine function. *Endocrinology* 2004;145:(3):1082-6 (2004).
- [10] Hu R, Cai WQ, Wu XG, Yang Z. Astrocyte-derived estrogen enhances synapse formation and synaptic transmission between cultured neonatal rat cortical neurons. *Neuroscience* 2007 ;144:(4):1229-40 (2007).
- [11] Marin R, Guerra B, Alonso R, Ramirez CM, Diaz M. Estrogen activates classical and alternative mechanisms to orchestrate neuroprotection. *Curr Neurovasc Res* 2005;2:(4):287-301 (2005).
- [12] Hao J, Janssen WG, Tang Y, Roberts JA, McKay H, Lasley B, et al. Estrogen increases the number of spinophilin-immunoreactive spines in the hippocampus of young and aged female rhesus monkeys. *J Comp Neurol* 2003;465:(4):540-50 (2003).
- [13] Woolley CS, McEwen BS. Estradiol mediates fluctuation in hippocampal synapse density during the estrous cycle in the adult rat. *J Neurosci* 1992;12:(7):2549-54 (1992).
- [14] Pike CJ, Carroll JC, Rosario ER, Barron AM. Protective actions of sex steroid hormones in Alzheimer's disease. *Front Neuroendocrinol* 2009;30:(2):239-58 (2009).

Formatted [48]

Formatted: Indent: Left: 0", Hanging: 0.5"

Formatted: German (Germany)

Formatted: Font: Calibri, German (Germany)

Formatted: German (Germany)

Formatted: Font: Calibri, German (Germany)

Formatted: German (Germany)

Formatted: Font: Calibri, German (Germany)

Formatted: German (Germany)

Formatted [49]

Formatted: Italian (Italy)

Formatted: Indent: Left: 0", Hanging: 0.5"

Formatted [50]

Formatted [51]

Formatted [52]

Formatted: Font: Calibri

Formatted: Italian (Italy)

Formatted: Indent: Left: 0", Hanging: 0.5"

Formatted [53]

Formatted [54]

Formatted [55]

Formatted [56]

Formatted [57]

Formatted [58]

- [14] 13. Amtul Z, Wang L, Westaway D, Rozmahel RF. Neuroprotective mechanism conferred by 17beta-estradiol on the biochemical basis of Alzheimer's disease. *Neuroscience*;169:(2):781-6.
- [15] 14. Janicki SC, Schupf N. Hormonal influences on cognition and risk for Alzheimer's disease. *Curr Neurol Neurosci Rep*;10(5):359-66.
15. Seshadri S, Fitzpatrick AL, Ikram MA, DeStefano AL, Gudnason V, Boada M, et al. Genome-wide analysis of genetic loci associated with Alzheimer disease. *JAMA*;303(18):1832-40.
16. Holland D, Desikan RS, Dale AM, McEvoy LK. Higher Rates of Decline for Women and Apolipoprotein E {varepsilon}4 Carriers. *AJNR Am J Neuroradiol*.
17. Callahan MJ, Lipinski WJ, Bian F, Durham RA, Pack A, Walker LC. Augmented senile plaque load in aged female beta-amyloid precursor protein-transgenic mice. *Am J Pathol* 2001;158(3):1173-7.
18. Wang J, Tanila H, Puolivali J, Kadish I, van Groen T. Gender differences in the amount and deposition of amyloidbeta in APPswe and PS1 double transgenic mice. *Neurobiol Dis* 2003;14(3):318-27.
19. Wang X, Dykens JA, Perez E, Liu R, Yang S, Covey DF, et al. Neuroprotective effects of 17beta-estradiol and nonfeminizing estrogens against H2O2 toxicity in human neuroblastoma SK-N-SH cells. *Mol Pharmacol* 70: 395-404 (2006).
- [16] Baldereschi M, Di Carlo A, Lepore V, Bracco L, Maggi S, Grigoletto F, et al. Estrogen-replacement therapy and Alzheimer's disease in the Italian Longitudinal Study on Aging. *Neurology* 1998;50:(4):996-1002 (1998).
- [17] 20. Tang MX, Jacobs D, Stern Y, Marder K, Schofield P, Gurland B, et al. Effect of oestrogen during menopause on risk and age at onset of Alzheimer's disease. *Lancet* 1996;348:(9025):429-32 (1996).
- [18] 21. Kawas C, Resnick S, Morrison A, Brookmeyer R, Corrada M, Zonderman A, et al. A prospective study of estrogen replacement therapy and the risk of developing Alzheimer's disease: the Baltimore Longitudinal Study of Aging. *Neurology* 1997;48:(6):1517-21 (1997).
- [19] 22. Resnick SM, Metter EJ, Zonderman AB. Estrogen replacement therapy and longitudinal decline in visual memory. A possible protective effect? *Neurology* 1997;49:(6):1491-7 (1997).
- [20] 23. Hogervorst E, Bandelow S. Brain and cognition. Is there any case for improving cognitive function in menopausal women using estrogen treatment? *Minerva Ginecol* 2009;61:(6):499-515 (2009).
- [21] 24. Maki PM, Sundermann E. Hormone therapy and cognitive function. *Hum Reprod Update* 2009;15:(6):667-81 (2009).
- [22] 25. Henderson VW. Alzheimer's disease: Review of hormone therapy trials and implications for treatment and prevention after menopause. *J Steroid Biochem Mol Biol*.
26. Nathan BP, Barsukova AG, Shen F, McAsey M, Struble RG. Estrogen facilitates neurite extension via apolipoprotein E in cultured adult mouse cortical neurons. *Endocrinology* 2004;145:(7):3065-73 (2004).
- [23] 27. Shughrue P, Scrimo P, Lane M, Askew R, Merchenthaler I. The distribution of estrogen receptor-beta mRNA in forebrain regions of the estrogen receptor-alpha knockout mouse. *Endocrinology* 1997;138:(12):5649-52 (1997).

Formatted ... [59]

Formatted: Font: Calibri

Formatted ... [60]

Formatted: Indent: Left: 0", Hanging: 0.5"

Formatted ... [61]

Formatted ... [62]

Formatted ... [63]

Formatted ... [64]

Formatted ... [65]

Formatted ... [66]

Formatted: Indent: Left: 0", Hanging: 0.5"

Formatted ... [67]

Formatted ... [68]

- [24]—28. Shughrue PJ, Lane MV, Merchenthaler I. Comparative distribution of estrogen receptor-alpha and -beta mRNA in the rat central nervous system. *J Comp Neurol* 1997;388-(4):507-25 (1997).
- [25]—29. Castagnoli A, Maestri I, Bernardi F, Del Senno L. PvuII RFLP inside the human estrogen receptor gene. *Nucleic Acids Res* 1987;15-(2):866 (1987).
- [26]—30. Yaffe K, Lui LY, Grady D, Stone K, Morin P. Estrogen receptor 1 polymorphisms and risk of cognitive impairment in older women. *Biological psychiatry* 2002;51(8):677-82.
- [31]. Maruyama H, Toji H, Harrington CR, Sasaki K, Izumi Y, Ohnuma T, et al. Lack of an association of estrogen receptor alpha gene polymorphisms and transcriptional activity with Alzheimer disease. *Arch Neurol* 2000;57-(2):236-40 (2000).
- [27]—32. Brandi ML, Becherini L, Gennari L, Racchi M, Bianchetti A, Nacmias B, et al. Association of the estrogen receptor alpha gene polymorphisms with sporadic Alzheimer's disease. *Biochem Biophys Res Commun* 1999;265-(2):335-8 (1999).
- [28]—33. Isoe-Wada K, Maeda M, Yong J, Adachi Y, Harada H, Urakami K, et al. Positive association between an estrogen receptor gene polymorphism and Parkinson's disease with dementia. *Eur J Neurol* 1999;6-(4):431-5 (1999).
- [29]—34. Mattila KM, Axelman K, Rinne JO, Blomberg M, Lehtimäki T, Laippala P, et al. Interaction between estrogen receptor 1 and the epsilon4 allele of apolipoprotein E increases the risk of familial Alzheimer's disease in women. *Neurosci Lett* 2000;282-(1-2):45-8 (2000).
- [30]—35. Pavao M, Traish AM. Estrogen receptor antibodies: specificity and utility in detection, localization and analyses of estrogen receptor alpha and beta. *Steroids* 2001;66-(1):1-16 (2001).
- [31]—36. Weickert CS, Miranda-Angulo AL, Wong J, Perlman WR, Ward SE, Radhakrishna V, et al. Variants in the estrogen receptor alpha gene and its mRNA contribute to risk for schizophrenia. *Hum Mol Genet* 2008;17-(15):2293-309 (2008).
- [32]—37. Pirskanen M, Hiltunen M, Mannermaa A, Helisalmi S, Lehtovirta M, Hanninen T, et al. Estrogen receptor beta gene variants are associated with increased risk of Alzheimer's disease in women. *Eur J Hum Genet* 2005;13-(9):1000-6 (2005).
- [33]—38. Westberg L, Hakansson A, Melke J, Shahabi HN, Nilsson S, Buervenich S, et al. Association between the estrogen receptor beta gene and age of onset of Parkinson's disease. *Psychoneuroendocrinology* 2004;29-(8):993-8 (2004).
- [34]—39. Dresner-Pollak R, Kinnar T, Friedlander Y, Sharon N, Rosenmann H, Pollak A. Estrogen receptor beta gene variant is associated with vascular dementia in elderly women. *Genet Test Mol Biomarkers* 2009;13-(3):339-42 (2009).
- [35]—40. Petersen RC. Mild cognitive impairment clinical trials. *Nat Rev Drug Discov* 2003;2-(8):646-53 (2003).
- [36]—41. Wilton S, Lim L. Rapid identification of ApoE alleles by multiple-single-strand conformation polymorphism (SSCP) analysis. *Trends Genet* 1995;11(9):341.
- [42]. Alvarez-Alvarez M, Galdos L, Fernandez-Martinez M, Gomez-Busto F, Garcia-Centeno V, Arias-Arias C, et al. 5-Hydroxytryptamine 6 receptor (5-HT(6)) receptor and apolipoprotein E (ApoE) polymorphisms in patients with Alzheimer's disease in the Basque Country. *Neurosci Lett* 2003;339(1):85-7.

43. Rousset F. genepop'007: a complete re-implementation of the genepop software for Windows and Linux. *Molecular ecology resources* 2008;8(1):103-6.

44. Corbo RM, Gambina G, Ruggeri M, Scacchi R. Association of estrogen receptor alpha (ESR1) PvuII and XbaI polymorphisms with sporadic Alzheimer's disease and their effect on apolipoprotein E concentrations. *Dement Geriatr Cogn Disord* 2006;22-(1):67-72 (2006).

[37] 45. Monastero R, Cefalu AB, Camarda C, Noto D, Camarda LK, Caldarella R, et al. Association of estrogen receptor alpha gene with Alzheimer's disease: a case-control study. *J Alzheimers Dis* 2006;9-(3):273-8 (2006).

[38] 46. Porrello E, Monti MC, Sinforiani E, Cairati M, Guaita A, Montomoli C, et al. Estrogen receptor alpha and APOEepsilon4 polymorphisms interact to increase risk for sporadic AD in Italian females. *Eur J Neurol* 2006;13-(6):639-44 (2006).

[39] 47. den Heijer T, Schuit SC, Pols HA, van Meurs JB, Hofman A, Koudstaal PJ, et al. Variations in estrogen receptor alpha gene and risk of dementia, and brain volumes on MRI. *Mol Psychiatry* 2004;9-(12):1129-35 (2004).

[40] 48. Lambert JC, Harris JM, Mann D, Lemmon H, Coates J, Cumming A, et al. Are the estrogen receptors involved in Alzheimer's disease? *Neurosci Lett* 2001;306-(3):193-7 (2001).

[41] 49. Prince JA, Feuk L, Sawyer SL, Gottfries J, Ricksten A, Nagga K, et al. Lack of replication of association findings in complex disease: an analysis of 15 polymorphisms in prior candidate genes for sporadic Alzheimer's disease. *Eur J Hum Genet* 2001;9-(6):437-44 (2001).

[42] 50. Usui C, Shibata N, Ohnuma T, Higashi S, Ohkubo T, Ueki A, et al. No genetic association between the myeloperoxidase gene -463 polymorphism and estrogen receptor-alpha gene polymorphisms and Japanese sporadic Alzheimer's disease. *Dement Geriatr Cogn Disord* 2006;21-(5-6):296-9 (2006).

[43] 51. Luckhaus C, Sand PG. Estrogen Receptor 1 gene (ESR1) variants in Alzheimer's disease. Results of a meta-analysis. *Aging Clin Exp Res* 2007;19-(2):165-8 (2007).

[44] 52. Rodriguez E, Mateo I, Llorca J, Sanchez-Quintana C, Infante J, Berciano J, et al. No association between low density lipoprotein receptor genetic variants and Alzheimer's disease risk. *Am J Med Genet B Neuropsychiatr Genet* 2006;141B-(5):541-3 (2006).

[45] 53. Boada M, Antunez C, Lopez-Arrieta J, Caruz A, Moreno-Rey C, Ramirez-Lorca R, et al. Estrogen receptor alpha gene variants are associated with Alzheimer's disease. *Neurobiol Aging*.

[46] 54. Ji Y, Urakami K, Wada-Isoe K, Adachi Y, Nakashima K. Estrogen receptor gene polymorphisms in patients with Alzheimer's disease, vascular dementia and alcohol-associated dementia. *Dement Geriatr Cogn Disord* 2000;11-(3):119-22 (2000).

[47] 55. Lin GF, Ma QW, Zhang DS, Zha YL, Lou KJ, Shen JH. Polymorphism of alpha-estrogen receptor and aryl hydrocarbon receptor genes in dementia patients in Shanghai suburb. *Acta Pharmacol Sin* 2003;24-(7):651-6 (2003).

[48] 56. Long JR, Xu H, Zhao LJ, Liu PY, Shen H, Liu YJ, et al. The oestrogen receptor alpha gene is linked and/or associated with age of menarche in different ethnic groups. *J Med Genet* 2005;42-(10):796-800 (2005).

Formatted: Indent: Left: 0", Hanging: 0.5"

Formatted ... [81]

Formatted: Italian (Italy)

Formatted: Font: Calibri, Italian (Italy)

Formatted: Italian (Italy)

Formatted: Font: Calibri, Italian (Italy)

Formatted: Italian (Italy)

Formatted ... [82]

Formatted: Italian (Italy)

Formatted: Font: Calibri, Italian (Italy)

Formatted: Italian (Italy)

Formatted: Font: Calibri, Italian (Italy)

Formatted: Italian (Italy)

Formatted ... [83]

Formatted

Formatted ... [84]

Formatted ... [85]

Formatted ... [86]

Formatted ... [87]

Formatted ... [88]

Formatted: English (U.S.)

Formatted: Font: Calibri, English (U.S.)

Formatted: English (U.S.)

Formatted: Font: Calibri, English (U.S.)

Formatted: English (U.S.)

Formatted ... [89]

Formatted ... [90]

Formatted ... [91]

Formatted ... [92]

Formatted ... [93]

Formatted: German (Germany)

Formatted: Font: Calibri, German (Germany)

Formatted: German (Germany)

Formatted: Font: Calibri, German (Germany)

1  
2  
3  
4  
5  
6  
7  
8  
9  
10  
11  
12  
13  
14  
15  
16  
17  
18  
19  
20  
21  
22  
23  
24  
25  
26  
27  
28  
29  
30  
31  
32  
33  
34  
35  
36  
37  
38  
39  
40  
41  
42  
43  
44  
45  
46  
47  
48  
49  
50  
51  
52  
53  
54  
55  
56  
57  
58  
59  
60

[49] 57. Forsell C, Enmark E, Axelman K, Blomberg M, Wahlund LO, Gustafsson JA, et al. Investigations of a CA repeat in the oestrogen receptor beta gene in patients with Alzheimer's disease. *Eur J Hum Genet* 2001;9:(10):802-4 (2001).

[50] 58. Goumidi L, Dahlman-Wright K, Tapia-Paez I, Matsson H, Pasquier F, Amouyel P, et al. Study of estrogen receptor-alpha and receptor-beta gene polymorphisms on Alzheimer's disease. *J Alzheimers Dis Journal of Alzheimer's disease : JAD*;26-(3):431-9.

[51] 59. Wang X, Dykens JA, Perez E, Liu R, Yang S, Covey DF, et al. Neuroprotective effects of 17beta-estradiol and nonfeminizing estrogens against H2O2 toxicity in human neuroblastoma SK-N-SH cells. *Mol Pharmacol* 2006;70(1):395-404.

60. Ishunina TA, van Heerikhuize JJ, Ravid R, Swaab DF. Estrogen receptors and metabolic activity in the human tuberomammillary nucleus: changes in relation to sex, aging and Alzheimer's disease. *Brain Res-research* 2003;988-(1-2):84-96 (2003).

[52] 61. Chace C, Pang D, Weng C, Temkin A, Lax S, Silverman W, et al. Variants in CYP17 and CYP19 cytochrome P450 genes are associated with onset of Alzheimer's disease in women with down syndrome. *Journal of Alzheimer's disease : JAD* 2012;28(3):601-12.

62. Birge SJ. The role of estrogen in the treatment of Alzheimer's disease. *Neurology* 1997;48-(5 Suppl 7):S36-41 (1997).

[53] 63. Stone DJ, Rozovsky I, Morgan TE, Anderson CP, Finch CE. Increased synaptic sprouting in response to estrogen via an apolipoprotein E-dependent mechanism: implications for Alzheimer's disease. *J Neurosci* 1998;18-(9):3180-5 (1998).

[54] 64. Toran-Allerand CD, Miranda RC, Bentham WD, Sohrabji F, Brown TJ, Hochberg RB, et al. Estrogen receptors colocalize with low-affinity nerve growth factor receptors in cholinergic neurons of the basal forebrain. *Proc Natl Acad Sci U S A* 1992;89-(10):4668-72 (1992).

[55] 65. Gandy S. Estrogen and neurodegeneration. *Neurochem Res* 2003;28-(7):1003-8 (2003).

66. Raber J. AR, apoE, and cognitive function. *Hormones and behavior* 2008;53(5):706-15.

67. Lund TD, Hinds LR, Handa RJ. The androgen 5alpha-dihydrotestosterone and its metabolite 5alpha-androstan-3beta, 17beta-diol inhibit the hypothalamo-pituitary-adrenal response to stress by acting through estrogen receptor beta-expressing neurons in the hypothalamus. *The Journal of neuroscience : the official journal of the Society for Neuroscience* 2006;26(5):1448-56.

Formatted: German (Germany)

Formatted ... [94]

Formatted ... [95]

Formatted: Font: Calibri

Formatted: Indent: Left: 0", Hanging: 0.5"

Formatted ... [96]

Formatted ... [97]

Formatted: Indent: Left: 0", Hanging: 0.5"

Formatted ... [98]

Formatted ... [99]

Formatted ... [100]

Formatted: Font: Calibri

Formatted: Indent: Left: 0", First line: 0"

Formatted: Font: 10 pt, English (U.K.)

Formatted: Left

Formatted: Font: Calibri, English (U.K.)



7/30/2013 11:53:00 AM

1 7/30/2013 11:53:00 AM

4 7/30/2013 11:53:00 AM

7 7/30/2013 11:53:00 AM

10 7/30/2013 11:53:00 AM

13 7/30/2013 11:53:00 AM

15 7/30/2013 11:53:00 AM

18 7/30/2013 11:53:00 AM

21 7/30/2013 11:53:00 AM

For peer review only

2  
3  
5  
6  
8  
9  
11  
12  
14  
16  
17  
19  
20  
22  
23  
24  
25  
26  
27  
28  
29  
30  
31  
32  
33  
34  
35  
36  
37  
38  
39  
40  
41  
42  
43  
44  
45  
46  
47  
48  
49  
50  
51  
52  
53  
54  
55  
56  
57  
58  
59  
60

7/30/2013 11:53:00 AM

- 1
- 2
- 3
- 4
- 5
- 6
- 7
- 8
- 9
- 10
- 11
- 12
- 13
- 14
- 15
- 16
- 17
- 18
- 19
- 20
- 21
- 22
- 23
- 24
- 25
- 26
- 27
- 28
- 29
- 30
- 31
- 32
- 33
- 34
- 35
- 36
- 37
- 38
- 39
- 40
- 41
- 42
- 43
- 44
- 45
- 46
- 47
- 48
- 49
- 50
- 51
- 52
- 53
- 54
- 55
- 56
- 57
- 58
- 59
- 60

7/30/2013 11:53:00 AM

For peer review only

7/30/2013 11:53:00 AM

1 7/30/2013 11:53:00 AM

2

3

4 7/30/2013 11:53:00 AM

5

6

7 7/30/2013 11:53:00 AM

8

9

10 7/30/2013 11:53:00 AM

11

12 7/30/2013 11:53:00 AM

13

14

15 7/30/2013 11:53:00 AM

16

17

18 7/30/2013 11:53:00 AM

19

20

21 7/30/2013 11:53:00 AM

22

23

24

25

26

27

28

29

30

31

32

33

34

35

36

37

38

39

40

41

42

43

44

45

46

47

48

49

50

51

52

53

54

55

56

57

58

59

60

For peer review only

7/30/2013 11:53:00 AM

- 1
- 2
- 3
- 4
- 5
- 6
- 7
- 8
- 9
- 10
- 11
- 12
- 13
- 14
- 15
- 16
- 17
- 18
- 19
- 20
- 21
- 22
- 23
- 24
- 25
- 26
- 27
- 28
- 29
- 30
- 31
- 32
- 33
- 34
- 35
- 36
- 37
- 38
- 39
- 40
- 41
- 42
- 43
- 44
- 45
- 46
- 47
- 48
- 49
- 50
- 51
- 52
- 53
- 54
- 55
- 56
- 57
- 58
- 59
- 60

7/30/2013 11:53:00 AM

For peer review only

7/30/2013 11:53:00 AM

1 7/30/2013 11:53:00 AM

2

3

4 7/30/2013 11:53:00 AM

5

6

7 7/30/2013 11:53:00 AM

8

9

10 7/30/2013 11:53:00 AM

11

12 7/30/2013 11:53:00 AM

13

14

15 7/30/2013 11:53:00 AM

16

17

18 7/30/2013 11:53:00 AM

19

20

21 7/30/2013 11:53:00 AM

22

23

24

25

26

27

28

29

30

31

32

33

34

35

36

37

38

39

40

41

42

43

44

45

46

47

48

49

50

51

52

53

54

55

56

57

58

59

60

For peer review only

7/30/2013 11:53:00 AM

- 1
- 2
- 3
- 4
- 5
- 6
- 7
- 8
- 9
- 10
- 11
- 12
- 13
- 14
- 15
- 16
- 17
- 18
- 19
- 20
- 21
- 22
- 23
- 24
- 25
- 26
- 27
- 28
- 29
- 30
- 31
- 32
- 33
- 34
- 35
- 36
- 37
- 38
- 39
- 40
- 41
- 42
- 43
- 44
- 45
- 46
- 47
- 48
- 49
- 50
- 51
- 52
- 53
- 54
- 55
- 56
- 57
- 58
- 59
- 60

7/30/2013 11:53:00 AM

For peer review only

7/30/2013 11:53:00 AM

1 7/30/2013 11:53:00 AM

2

3

4 7/30/2013 11:53:00 AM

5

6

7 7/30/2013 11:53:00 AM

8

9

10 7/30/2013 11:53:00 AM

11

12 7/30/2013 11:53:00 AM

13

14

15 7/30/2013 11:53:00 AM

16

17

18 7/30/2013 11:53:00 AM

19

20

21 7/30/2013 11:53:00 AM

22

23

24

25

26

27

28

29

30

31

32

33

34

35

36

37

38

39

40

41

42

43

44

45

46

47

48

49

50

51

52

53

54

55

56

57

58

59

60

For peer review only

7/30/2013 11:53:00 AM

- 1
- 2
- 3
- 4
- 5
- 6
- 7
- 8
- 9
- 10
- 11
- 12
- 13
- 14
- 15
- 16
- 17
- 18
- 19
- 20
- 21
- 22
- 23
- 24
- 25
- 26
- 27
- 28
- 29
- 30
- 31
- 32
- 33
- 34
- 35
- 36
- 37
- 38
- 39
- 40
- 41
- 42
- 43
- 44
- 45
- 46
- 47
- 48
- 49
- 50
- 51
- 52
- 53
- 54
- 55
- 56
- 57
- 58
- 59
- 60

7/30/2013 11:53:00 AM

For peer review only



7/30/2013 11:53:00 AM

7/30/2013 11:53:00 AM

7/30/2013 11:58:00 AM

For peer review only

7/30/2013 11:53:00 AM

- 1
- 2
- 3
- 4
- 5
- 6
- 7
- 8
- 9
- 10
- 11
- 12
- 13
- 14
- 15
- 16
- 17
- 18
- 19
- 20
- 21
- 22
- 23
- 24
- 25
- 26
- 27
- 28
- 29
- 30
- 31
- 32
- 33
- 34
- 35
- 36
- 37
- 38
- 39
- 40
- 41
- 42
- 43
- 44
- 45
- 46
- 47
- 48
- 49
- 50
- 51
- 52
- 53
- 54
- 55
- 56
- 57
- 58
- 59
- 60

7/30/2013 11:53:00 AM

For peer review only

7/30/2013 11:53:00 AM

1 7/30/2013 11:53:00 AM

2

3

4 7/30/2013 11:53:00 AM

5

6

7 7/30/2013 11:53:00 AM

8

9

10 7/30/2013 11:53:00 AM

11

12 7/30/2013 11:53:00 AM

13

14

15 7/30/2013 11:53:00 AM

16

17

18 7/30/2013 11:53:00 AM

19

20

21 7/30/2013 11:53:00 AM

22

23

24

25

26

27

28

29

30

31

32

33

34

35

36

37

38

39

40

41

42

43

44

45

46

47

48

49

50

51

52

53

54

55

56

57

58

59

60

For peer review only

7/30/2013 11:53:00 AM

- 1
- 2
- 3
- 4
- 5
- 6
- 7
- 8
- 9
- 10
- 11
- 12
- 13
- 14
- 15
- 16
- 17
- 18
- 19
- 20
- 21
- 22
- 23
- 24
- 25
- 26
- 27
- 28
- 29
- 30
- 31
- 32
- 33
- 34
- 35
- 36
- 37
- 38
- 39
- 40
- 41
- 42
- 43
- 44
- 45
- 46
- 47
- 48
- 49
- 50
- 51
- 52
- 53
- 54
- 55
- 56
- 57
- 58
- 59
- 60

7/30/2013 11:53:00 AM

For peer review only

7/30/2013 11:53:00 AM

1 7/30/2013 11:53:00 AM

2

3

4 7/30/2013 11:53:00 AM

5

6

7 7/30/2013 11:53:00 AM

8

9

10 7/30/2013 11:53:00 AM

11

12

13 7/30/2013 11:53:00 AM

14

15 7/30/2013 11:53:00 AM

16

17

18 7/30/2013 11:53:00 AM

19

20

21 7/30/2013 11:53:00 AM

22

23

24

25

26

27

28

29

30

31

32

33

34

35

36

37

38

39

40

41

42

43

44

45

46

47

48

49

50

51

52

53

54

55

56

57

58

59

60

For peer review only

7/30/2013 11:53:00 AM

- 1
- 2
- 3
- 4
- 5
- 6
- 7
- 8
- 9
- 10
- 11
- 12
- 13
- 14
- 15
- 16
- 17
- 18
- 19
- 20
- 21
- 22
- 23
- 24
- 25
- 26
- 27
- 28
- 29
- 30
- 31
- 32
- 33
- 34
- 35
- 36
- 37
- 38
- 39
- 40
- 41
- 42
- 43
- 44
- 45
- 46
- 47
- 48
- 49
- 50
- 51
- 52
- 53
- 54
- 55
- 56
- 57
- 58
- 59
- 60

7/30/2013 11:53:00 AM

For peer review only

7/30/2013 11:53:00 AM

1 7/30/2013 11:53:00 AM

2

3

4 7/30/2013 11:53:00 AM

5

6

7 7/30/2013 11:53:00 AM

8

9

10 7/30/2013 11:53:00 AM

11

12 7/30/2013 11:53:00 AM

13

14

15 7/30/2013 11:53:00 AM

16

17

18 7/30/2013 11:53:00 AM

19

20

21 7/30/2013 11:53:00 AM

22

23

24

25

26

27

28

29

30

31

32

33

34

35

36

37

38

39

40

41

42

43

44

45

46

47

48

49

50

51

52

53

54

55

56

57

58

59

60

For peer review only

7/30/2013 11:53:00 AM

- 1
- 2
- 3
- 4
- 5
- 6
- 7
- 8
- 9
- 10
- 11
- 12
- 13
- 14
- 15
- 16
- 17
- 18
- 19
- 20
- 21
- 22
- 23
- 24
- 25
- 26
- 27
- 28
- 29
- 30
- 31
- 32
- 33
- 34
- 35
- 36
- 37
- 38
- 39
- 40
- 41
- 42
- 43
- 44
- 45
- 46
- 47
- 48
- 49
- 50
- 51
- 52
- 53
- 54
- 55
- 56
- 57
- 58
- 59
- 60

7/30/2013 11:53:00 AM

For peer review only



7/30/2013 11:53:00 AM

1 7/30/2013 11:53:00 AM

2

3

4 7/30/2013 11:53:00 AM

5

6

7 7/30/2013 11:53:00 AM

8

9

10 7/30/2013 11:53:00 AM

11

12 7/30/2013 11:53:00 AM

13

14

15 7/30/2013 11:53:00 AM

16

17

18 7/30/2013 11:53:00 AM

19

20

21 7/30/2013 11:53:00 AM

22

23

24

25

26

27

28

29

30

31

32

33

34

35

36

37

38

39

40

41

42

43

44

45

46

47

48

49

50

51

52

53

54

55

56

57

58

59

60

For peer review only

7/30/2013 11:53:00 AM

1  
2  
3  
4  
5  
6  
7  
8  
9  
10  
11  
12  
13  
14  
15  
16  
17  
18  
19  
20  
21  
22  
23  
24  
25  
26  
27  
28  
29  
30  
31  
32  
33  
34  
35  
36  
37  
38  
39  
40  
41  
42  
43  
44  
45  
46  
47  
48  
49  
50  
51  
52  
53  
54  
55  
56  
57  
58  
59  
60

7/30/2013 11:53:00 AM

7/30/2013 11:53:00 AM

7/30/2013 11:53:00 AM

7/30/2013 11:58:00 AM

7/30/2013 11:58:00 AM

7/30/2013 11:58:00 AM

7/30/2013 11:58:00 AM

For peer review only

1  
2  
3  
4  
5  
6  
7  
8  
9  
10  
11  
12  
13  
14  
15  
16  
17  
18  
19  
20  
21  
22  
23  
24  
25  
26  
27  
28  
29  
30  
31  
32  
33  
34  
35  
36  
37  
38  
39  
40  
41  
42  
43  
44  
45  
46  
47  
48  
49  
50  
51  
52  
53  
54  
55  
56  
57  
58  
59  
60

For peer review only

Supplementary Table 1: Risk factors for combined effects in MCI and AD from Logistic Regression Models

| <i>ESR1</i>                   |                   | MCI   |                   | AD     |  |
|-------------------------------|-------------------|-------|-------------------|--------|--|
| Combined Effects              | OR CI95%          | p     | OR CI95%          | p      |  |
| E4 (+)*X*Women <sup>a1</sup>  | 4.32 (1.80-10.39) | 0.001 | 7.46 (3.46-16.10) | <0.001 |  |
| E4 (+)*X*Men <sup>a2</sup>    | 5.02 (1.95-12.89) | 0.001 | 3.84 (1.60-9.21)  | 0.003  |  |
| E4 (+)*P*Women <sup>b1</sup>  | 3.62 (1.51-8.67)  | 0.004 | 9.71 (4.20-22.43) | <0.001 |  |
| E4 (+)*P*Men <sup>b2</sup>    | 3.87 (1.52-9.82)  | 0.004 | 4.67 (1.86-11.71) | 0.004  |  |
| E4 (+)*A*Women <sup>c1</sup>  | 1.51 (0.93-3.63)  | 0.348 | 4.45 (2.18-9.08)  | <0.001 |  |
| E4 (+)*A*Men <sup>c2</sup>    | 5.05 (1.77-14.42) | 0.002 | 3.87 (1.39-10.76) | 0.010  |  |
| <i>ESR-2</i>                  |                   |       |                   |        |  |
| Combined Effects              |                   |       |                   |        |  |
| E4 (+)*A* Women <sup>d1</sup> | 2.14 (1.03-4.49)  | 0.041 | 4.71 (2.49-8.90)  | 0.001  |  |
| E4 (+)*A* Men <sup>d2</sup>   | 4.20 (1.62-10.87) | 0.003 | 4.74 (1.94-11.56) | 0.001  |  |

<sup>a1</sup> Women selected by at least one E4 allele of APOE gene and at least on X allele of Xbal. Reference category was sample control. <sup>a2</sup> Men selected by at least one E4 of APOE gene and at least one X allele of Xbal. Reference category was sample control. <sup>b1</sup> Women selected by at least one E4 allele of APOE gene and at least one P allele of P vull. Reference category was sample control. <sup>b2</sup> Men selected by at least one E4 of APOE gene and at least one P allele of P vull. Reference category was sample control. <sup>c1</sup> Women selected by at least one E4 allele of APOE gene and at least one A allele of rs2228480. Reference category was sample control. <sup>c2</sup> Men selected by at least one E4 allele of APOE gene and at least one A allele of rs2228480. Reference category was sample control. <sup>d1</sup> Women selected by at least one E4 allele of APOE gene and at least one A allele of rs4986938. Reference category was sample control. <sup>d2</sup> Men selected by at least one E4 allele of APOE gene and at least one A allele of rs4986938. Reference category was sample control.

A significant increased OR was found between the X, P, SNP1-A and SNP2-A alleles tested and MCI men, but it has not been clearly observed in women. The opposite effect was observed in the AD group, women showed a greater OR than men. Supplementary table 2 shows the size of samples that carry the genetic characteristic considered in the input of combined models in all groups. Overall, significant differences between the control frequencies and patient's frequencies provided enough power to address this question for a minimum detectable OR between 2.0 and 5.

Supplementary table 2. Samples size for each group considered in combined calculations.

|       | Alleles | MCI (N=204)   |               |               |               | AD (N=350)     |               |               |               | CTL (N=262)  |              |               |               |
|-------|---------|---------------|---------------|---------------|---------------|----------------|---------------|---------------|---------------|--------------|--------------|---------------|---------------|
|       |         | E4(+)         |               | E4(-)         |               | E4(+)          |               | E4(-)         |               | E4(+)        |              | E4(-)         |               |
|       |         | Women         | Men           | Women         | Men           | Women          | Men           | Women         | Men           | Women        | Men          | Women         | Men           |
| Xbal  | X(+)    | 34<br>(16.67) | 27<br>(13.24) | 47<br>(23.04) | 34<br>(16.67) | 88<br>(25.14)  | 31<br>(8.86)  | 76<br>(21.71) | 37<br>(10.57) | 19<br>(7.25) | 13<br>(4.96) | 79<br>(30.15) | 55<br>(20.99) |
|       | X(-)    | 11<br>(5.39)  | 6<br>(2.94)   | 33<br>(16.18) | 12<br>(5.88)  | 48<br>(13.71)  | 15<br>(4.29)  | 37<br>(10.57) | 18<br>(5.14)  | 12<br>(4.58) | 9<br>(3.44)  | 46<br>(17.56) | 29<br>(11.07) |
| Pvull | P(+)    | 38<br>(18.63) | 29<br>(14.22) | 52<br>(25.49) | 34<br>(16.67) | 102<br>(29.14) | 35<br>(10.00) | 83<br>(23.71) | 43<br>(12.29) | 21<br>(8.02) | 15<br>(5.73) | 90<br>(34.35) | 60<br>(22.90) |

|         |         |          |         |         |         |         |         |         |         |          |        |         |         |
|---------|---------|----------|---------|---------|---------|---------|---------|---------|---------|----------|--------|---------|---------|
|         | P(-)    | 7 (3.43) | 4       | 28      | 12      | 34      | 11      | 30      | 12      | 10       | 7      | 35      | 24      |
|         |         |          | (1.96)  | (13.73) | (5.88)  | (9.71)  | (3.14)  | (8.57)  | (3.43)  | (3.82)   | (2.67) | (13.36) | (9.16)  |
|         | A(+)    | 12       | 14      | 28      | 16      | 46      | 15      | 45      | 13      | 12       | 6      | 46      | 19      |
| ESR1    |         | (5.88)   | (6.86)  | (13.73) | (7.84)  | (13.14) | (4.29)  | (12.86) | (3.71)  | (4.58)   | (2.29) | (17.56) | (7.25)  |
| SNP1    | A(-)    | 33       | 19      | 52      | 30      | 90      | 31      | 68      | 42      | 19       | 16     | 79      | 65      |
|         |         | (16.18)  | (9.31)  | (25.49) | (14.71) | (25.71) | (8.86)  | (19.43) | (12.00) | (7.25)   | (6.11) | (30.15) | (24.81) |
|         | A(+)    | 29       | 21      | 51      | 31      | 88      | 30      | 73      | 36      | 21       | 11     | 80      | 51      |
| ESR2    |         | (14.22)  | (10.29) | (25.00) | (15.20) | (25.14) | (8.57)  | (20.86) | (10.29) | (8.02)   | (4.20) | (30.53) | (19.47) |
| SNP2    | A(-)    | 16       | 12      | 29      | 15      | 48      | 16      | 40      | 19      | 10       | 11     | 45      | 33      |
|         |         | (7.84)   | (5.88)  | (14.22) | (7.35)  | (13.71) | (4.57)  | (11.43) | (5.43)  | (3.82)   | (4.20) | (17.18) | (12.60) |
|         | XPAA(+) | 8 (2,29) | 5       | 14      | 7       | 21      | 7       | 17      | 6       | 4 (1,14) | 3      | 13      | 9       |
| Genetic |         |          | (1,43)  | (4,00)  | (2,00)  | (6,00)  | (2,00)  | (4,86)  | (1,71)  |          | (0,86) | (3,71)  | (2,57)  |
| profile | XPAA(-) | 37       | 28      | 66      | 39      | 115     | 39      | 96      | 49      | 27       | 19     | 112     | 75      |
|         |         | (10,57)  | (8,00)  | (18,86) | (11,14) | (32,86) | (11,14) | (27,43) | (14,00) | (7,71)   | (5,43) | (32,00) | (21,43) |

The percentages are calculated over the total size of each group. (+) presence of the allele, (-) Absence of the allele.
